# Supplementary material for: The mRNA and miRNA profiles of goat bronchial epithelial cells stimulated by Pasteurella multocida strains of serotype A and D
Source: PeerJ. 2022 Mar 18;10:e13047. doi: 10.7717/peerj.13047 (PMC8935994; doi:10.7717/peerj.13047)
Supplement: Table S1 [file peerj-10-13047-s001.xlsx]

## Sheet: Ctrl vs A_T4h
Total differentially expressed genes in the P. multocida strain serotype A- stimulated group
gene_id	gene_name	Description	mean Ctrl	mean A_T4h	fc	log2(fc)	p-value	q-value	regulation
102176667	DDIT4	PREDICTED: Capra hircus DNA damage inducible transcript 4 (DDIT4), mRNA	124.935	30.678	0.245552	-2.0259	4.3375e-155	5.77278e-151	down
102168471	NDRG1	PREDICTED: Capra hircus N-myc downstream regulated 1 (NDRG1), transcript variant X1, mRNA;PREDICTED: Capra hircus N-myc downstream regulated 1 (NDRG1), transcript variant X2, mRNA	452.21	177.426	0.392352	-1.34978	1.02522e-108	6.82236e-105	down
102178036	BNIP3	PREDICTED: Capra hircus BCL2 interacting protein 3 (BNIP3), mRNA	233.043	98.2041	0.421399	-1.24674	1.35512e-84	6.01176e-81	down
102179524	EGLN3	PREDICTED: Capra hircus egl-9 family hypoxia inducible factor 3 (EGLN3), mRNA	91.2997	36.8135	0.403216	-1.31037	2.05715e-83	6.84464e-80	down
100861074	ANKRD37	PREDICTED: Capra hircus ankyrin repeat domain 37 (ANKRD37), transcript variant X5, mRNA;PREDICTED: Capra hircus ankyrin repeat domain 37 (ANKRD37), transcript variant X3, mRNA;PREDICTED: Capra hircus ankyrin repeat domain 37 (ANKRD37), transcript variant X4, mRNA;PREDICTED: Capra hircus ankyrin repeat domain 37 (ANKRD37), transcript variant X1, mRNA;PREDICTED: Capra hircus ankyrin repeat domain 3…	15.6302	2.31149	0.147886	-2.75744	9.59862e-82	2.55496e-78	down
100860905	PTGS2	PREDICTED: Capra hircus prostaglandin-endoperoxide synthase 2 (PTGS2), mRNA	28.4711	64.4457	2.26355	1.17858	6.01065e-76	1.33326e-72	up
102178091	ADM	PREDICTED: Capra hircus adrenomedullin (ADM), transcript variant X3, mRNA;PREDICTED: Capra hircus adrenomedullin (ADM), transcript variant X1, mRNA;PREDICTED: Capra hircus adrenomedullin (ADM), transcript variant X4, mRNA;PREDICTED: Capra hircus adrenomedullin (ADM), transcript variant X2, mRNA	39.746	10.507	0.264354	-1.91946	7.96903e-73	1.51514e-69	down
102171331	SRSF6	PREDICTED: Capra hircus serine and arginine rich splicing factor 6 (SRSF6), mRNA	51.9834	113.031	2.17436	1.12059	1.11349e-66	1.85243e-63	up
102173397	LGALSL	PREDICTED: Capra hircus galectin like (LGALSL), mRNA	48.1541	96.5526	2.00507	1.00366	4.50074e-63	6.65559e-60	up
102172686	PPP1R3C	PREDICTED: Capra hircus protein phosphatase 1 regulatory subunit 3C (PPP1R3C), mRNA	20.7552	6.7158	0.323572	-1.62784	4.54912e-55	5.50402e-52	down
102178726	ZNF395	PREDICTED: Capra hircus zinc finger protein 395 (ZNF395), transcript variant X4, mRNA;PREDICTED: Capra hircus zinc finger protein 395 (ZNF395), transcript variant X1, mRNA;PREDICTED: Capra hircus zinc finger protein 395 (ZNF395), transcript variant X3, mRNA;PREDICTED: Capra hircus zinc finger protein 395 (ZNF395), transcript variant X2, mRNA	6.07933	1.39686	0.229772	-2.12173	1.5122e-54	1.67715e-51	down
102168845	LOC102168845	PREDICTED: Capra hircus uncharacterized LOC102168845 (LOC102168845), transcript variant X1, ncRNA;PREDICTED: Capra hircus uncharacterized LOC102168845 (LOC102168845), transcript variant X2, ncRNA	11.5162	3.32457	0.288685	-1.79243	2.46036e-54	2.51884e-51	down
102185032	KCTD11	PREDICTED: Capra hircus potassium channel tetramerization domain containing 11 (KCTD11), mRNA	31.2139	13.3281	0.426993	-1.22772	1.56029e-45	1.38439e-42	down
100860907	PTHLH	PREDICTED: Capra hircus parathyroid hormone like hormone (PTHLH), transcript variant X2, misc_RNA;PREDICTED: Capra hircus parathyroid hormone like hormone (PTHLH), transcript variant X3, mRNA;PREDICTED: Capra hircus parathyroid hormone like hormone (PTHLH), transcript variant X5, mRNA;PREDICTED: Capra hircus parathyroid hormone like hormone (PTHLH), transcript variant X8, mRNA;PREDICTED: Capra hi…	12.5729	27.1344	2.15816	1.1098	2.56501e-43	2.0081e-40	up
102184427	LOC102184427	PREDICTED: Capra hircus serine/arginine-rich splicing factor 6 pseudogene (LOC102184427), misc_RNA	29.4923	62.4578	2.11777	1.08254	1.73004e-40	1.21185e-37	up
102186419	TARDBP	PREDICTED: Capra hircus TAR DNA binding protein (TARDBP), transcript variant X1, mRNA;PREDICTED: Capra hircus TAR DNA binding protein (TARDBP), transcript variant X2, misc_RNA;PREDICTED: Capra hircus TAR DNA binding protein (TARDBP), transcript variant X3, mRNA	56.3165	28.1015	0.498992	-1.00291	2.77068e-40	1.75595e-37	down
102191082	STC2	PREDICTED: Capra hircus stanniocalcin 2 (STC2), mRNA	16.6009	7.54423	0.454446	-1.13782	1.96942e-35	9.36105e-33	down
102173156	MXI1	PREDICTED: Capra hircus MAX interactor 1, dimerization protein (MXI1), transcript variant X1, mRNA;PREDICTED: Capra hircus MAX interactor 1, dimerization protein (MXI1), transcript variant X2, mRNA	8.41205	3.06354	0.364185	-1.45726	1.91793e-34	8.80198e-32	down
106503773	IRF7	PREDICTED: Capra hircus interferon regulatory factor 7 (IRF7), mRNA	37.3072	18.0131	0.482833	-1.05041	1.31932e-31	5.66412e-29	down
102178957	C23H6orf223	PREDICTED: Capra hircus chromosome 23 C6orf223 homolog (C23H6orf223), ncRNA	9.32246	4.03373	0.43269	-1.2086	5.17886e-26	1.68111e-23	down
102169974	EFNB2	PREDICTED: Capra hircus ephrin B2 (EFNB2), mRNA	4.66637	9.90312	2.12223	1.08558	8.81668e-26	2.79384e-23	up
102177522	VLDLR	PREDICTED: Capra hircus very low density lipoprotein receptor (VLDLR), transcript variant X2, mRNA;PREDICTED: Capra hircus very low density lipoprotein receptor (VLDLR), transcript variant X1, mRNA	4.56669	2.10983	0.462004	-1.11402	4.40378e-23	1.19612e-20	down
102183116	RSRP1	PREDICTED: Capra hircus arginine and serine rich protein 1 (RSRP1), transcript variant X1, mRNA;PREDICTED: Capra hircus arginine and serine rich protein 1 (RSRP1), transcript variant X3, misc_RNA;PREDICTED: Capra hircus arginine and serine rich protein 1 (RSRP1), transcript variant X2, misc_RNA	14.8657	7.10788	0.478139	-1.0645	1.86356e-22	4.67963e-20	down
102178101	LOC102178101	PREDICTED: Capra hircus protein-serine O-palmitoleoyltransferase porcupine pseudogene (LOC102178101), misc_RNA	1.45363	3.17788	2.18617	1.1284	2.17949e-22	5.37165e-20	up
102170686	ARRDC2	PREDICTED: Capra hircus arrestin domain containing 2 (ARRDC2), transcript variant X2, mRNA;PREDICTED: Capra hircus arrestin domain containing 2 (ARRDC2), transcript variant X1, mRNA	9.63324	4.33833	0.45035	-1.15088	2.60923e-22	6.20112e-20	down
102189645	VAV3	PREDICTED: Capra hircus vav guanine nucleotide exchange factor 3 (VAV3), mRNA	2.8268	0.874535	0.309373	-1.69258	2.69149e-21	5.97016e-19	down
102191092	CDA	PREDICTED: Capra hircus cytidine deaminase (CDA), mRNA	25.5999	12.7356	0.497487	-1.00727	3.29413e-19	6.29175e-17	down
102182806	PTK6	PREDICTED: Capra hircus protein tyrosine kinase 6 (PTK6), mRNA	6.0073	2.69145	0.44803	-1.15833	3.30921e-19	6.29175e-17	down
102169571	CPEB2	PREDICTED: Capra hircus cytoplasmic polyadenylation element binding protein 2 (CPEB2), transcript variant X5, mRNA;PREDICTED: Capra hircus cytoplasmic polyadenylation element binding protein 2 (CPEB2), transcript variant X2, mRNA;PREDICTED: Capra hircus cytoplasmic polyadenylation element binding protein 2 (CPEB2), transcript variant X4, mRNA;PREDICTED: Capra hircus cytoplasmic polyadenylation el…	6.09419	15.1673	2.48881	1.31546	3.15671e-17	4.61678e-15	up
102173632	LOC102173632	PREDICTED: Capra hircus hypoxanthine-guanine phosphoribosyltransferase pseudogene (LOC102173632), transcript variant X1, misc_RNA;PREDICTED: Capra hircus hypoxanthine-guanine phosphoribosyltransferase pseudogene (LOC102173632), transcript variant X2, misc_RNA;PREDICTED: Capra hircus hypoxanthine-guanine phosphoribosyltransferase pseudogene (LOC102173632), transcript variant X3, misc_RNA	13.1169	6.24587	0.476169	-1.07045	6.48168e-17	8.9859e-15	down
108635303	LOC108635303	PREDICTED: Capra hircus collagen alpha-1(I) chain-like (LOC108635303), partial mRNA	0.803709	2.55883	3.18377	1.67074	8.47525e-17	1.16286e-14	up
102173853	ITPKA	PREDICTED: Capra hircus inositol-trisphosphate 3-kinase A (ITPKA), mRNA	3.28286	1.04092	0.317077	-1.6571	8.78356e-17	1.19286e-14	down
102188120	APLN	PREDICTED: Capra hircus apelin (APLN), transcript variant X2, mRNA;PREDICTED: Capra hircus apelin (APLN), transcript variant X1, mRNA	1.70743	0.420926	0.246525	-2.02019	1.32203e-14	1.41895e-12	down
102191360	BANP	PREDICTED: Capra hircus BTG3 associated nuclear protein (BANP), transcript variant X3, mRNA;PREDICTED: Capra hircus BTG3 associated nuclear protein (BANP), transcript variant X6, mRNA;PREDICTED: Capra hircus BTG3 associated nuclear protein (BANP), transcript variant X5, mRNA;PREDICTED: Capra hircus BTG3 associated nuclear protein (BANP), transcript variant X2, mRNA;PREDICTED: Capra hircus BTG3 as…	4.03217	1.8109	0.449112	-1.15485	1.89274e-14	1.97633e-12	down
108637154	LOC108637154	PREDICTED: Capra hircus uncharacterized LOC108637154 (LOC108637154), ncRNA	1.14274	0.330149	0.28891	-1.79131	6.86686e-14	6.25966e-12	down
102171839	LRRC4	PREDICTED: Capra hircus leucine rich repeat containing 4 (LRRC4), mRNA	1.47512	3.04661	2.06533	1.04637	1.04255e-13	9.37521e-12	up
102176690	HS3ST5	PREDICTED: Capra hircus heparan sulfate-glucosamine 3-sulfotransferase 5 (HS3ST5), mRNA	1.21415	0.344324	0.283593	-1.8181	4.53557e-12	3.00318e-10	down
102181150	FBXO17	PREDICTED: Capra hircus F-box protein 17 (FBXO17), transcript variant X3, mRNA;PREDICTED: Capra hircus F-box protein 17 (FBXO17), transcript variant X2, mRNA;PREDICTED: Capra hircus F-box protein 17 (FBXO17), transcript variant X1, mRNA	4.36883	1.71699	0.393009	-1.34736	5.22561e-12	3.39257e-10	down
102190585	C28H10orf99	PREDICTED: Capra hircus chromosome 28 C10orf99 homolog (C28H10orf99), mRNA	10.5986	4.90899	0.463172	-1.11038	6.56573e-12	4.18102e-10	down
102177680	LIMK1	PREDICTED: Capra hircus LIM domain kinase 1 (LIMK1), mRNA	4.34436	2.10711	0.485021	-1.04388	1.08078e-11	6.65875e-10	down
102171324	SEMA6B	PREDICTED: Capra hircus semaphorin 6B (SEMA6B), transcript variant X1, mRNA;PREDICTED: Capra hircus semaphorin 6B (SEMA6B), transcript variant X2, mRNA	1.68147	0.644521	0.383307	-1.38343	3.17377e-11	1.79743e-09	down
102179386	STC1	PREDICTED: Capra hircus stanniocalcin 1 (STC1), mRNA	1.75545	0.729559	0.415595	-1.26675	3.8156e-11	2.13369e-09	down
102179902	TRIM45	PREDICTED: Capra hircus tripartite motif containing 45 (TRIM45), mRNA	2.90389	1.43959	0.495746	-1.01233	5.21997e-11	2.82409e-09	down
102178968	GPRC5B	PREDICTED: Capra hircus G protein-coupled receptor class C group 5 member B (GPRC5B), mRNA	2.08994	0.839491	0.401682	-1.31587	5.36367e-11	2.87843e-09	down
108634774	LOC108634774	PREDICTED: Capra hircus collagen alpha-1(I) chain-like (LOC108634774), mRNA	2.76092	11.8311	4.28519	2.09936	6.18768e-11	3.28095e-09	up
102177651	FHOD1	PREDICTED: Capra hircus formin homology 2 domain containing 1 (FHOD1), transcript variant X2, mRNA;PREDICTED: Capra hircus formin homology 2 domain containing 1 (FHOD1), transcript variant X1, mRNA;PREDICTED: Capra hircus formin homology 2 domain containing 1 (FHOD1), transcript variant X3, mRNA	2.60525	1.2248	0.470127	-1.08888	1.08701e-10	5.47994e-09	down
102182155	YPEL4	PREDICTED: Capra hircus yippee like 4 (YPEL4), mRNA	8.99079	4.26998	0.474928	-1.07422	1.18055e-10	5.92904e-09	down
102171875	KLF4	PREDICTED: Capra hircus Kruppel like factor 4 (KLF4), transcript variant X3, mRNA;PREDICTED: Capra hircus Kruppel like factor 4 (KLF4), transcript variant X2, mRNA;PREDICTED: Capra hircus Kruppel like factor 4 (KLF4), transcript variant X1, mRNA	5.00169	15.9776	3.19444	1.67556	1.41843e-10	6.9918e-09	up
108635183	LOC108635183	PREDICTED: Capra hircus ubiquitin carboxyl-terminal hydrolase 33-like (LOC108635183), partial mRNA	0.0001	3.0517	30517	14.8973	1.65381e-10	8.00383e-09	up
102168597	LOC102168597	PREDICTED: Capra hircus uncharacterized LOC102168597 (LOC102168597), transcript variant X3, ncRNA;PREDICTED: Capra hircus uncharacterized LOC102168597 (LOC102168597), transcript variant X2, ncRNA;PREDICTED: Capra hircus uncharacterized LOC102168597 (LOC102168597), transcript variant X1, ncRNA	6.62547	3.27382	0.494127	-1.01705	1.71305e-10	8.23066e-09	down
102188023	LOC102188023	PREDICTED: Capra hircus N-acetyl-beta-glucosaminyl-glycoprotein 4-beta-N-acetylgalactosaminyltransferase 1 (LOC102188023), mRNA	2.91545	1.27863	0.43857	-1.18912	1.92646e-10	8.95305e-09	down
102180503	GPR21	PREDICTED: Capra hircus G protein-coupled receptor 21 (GPR21), mRNA	0.369454	0.889488	2.40758	1.26758	2.09924e-10	9.60098e-09	up
108634342	LOC108634342	PREDICTED: Capra hircus uncharacterized LOC108634342 (LOC108634342), mRNA	0.259425	0.0380257	0.146577	-2.77027	3.0453e-10	1.34651e-08	down
102185041	TPPP	PREDICTED: Capra hircus tubulin polymerization promoting protein (TPPP), transcript variant X4, mRNA;PREDICTED: Capra hircus tubulin polymerization promoting protein (TPPP), transcript variant X3, mRNA;PREDICTED: Capra hircus tubulin polymerization promoting protein (TPPP), transcript variant X2, mRNA;PREDICTED: Capra hircus tubulin polymerization promoting protein (TPPP), transcript variant X1, …	0.637596	0.190545	0.29885	-1.74251	3.58098e-10	1.5626e-08	down
102179052	DEGS2	PREDICTED: Capra hircus delta 4-desaturase, sphingolipid 2 (DEGS2), transcript variant X1, mRNA;PREDICTED: Capra hircus delta 4-desaturase, sphingolipid 2 (DEGS2), transcript variant X2, mRNA	2.34902	0.880643	0.374898	-1.41543	4.39257e-10	1.88583e-08	down
102176310	WNT5B	PREDICTED: Capra hircus Wnt family member 5B (WNT5B), mRNA	5.46742	2.72561	0.498519	-1.00428	5.51245e-10	2.30708e-08	down
102191231	KANK2	PREDICTED: Capra hircus KN motif and ankyrin repeat domains 2 (KANK2), transcript variant X3, mRNA;PREDICTED: Capra hircus KN motif and ankyrin repeat domains 2 (KANK2), transcript variant X1, mRNA;PREDICTED: Capra hircus KN motif and ankyrin repeat domains 2 (KANK2), transcript variant X2, mRNA	1.12832	0.498457	0.44177	-1.17863	6.68416e-10	2.76272e-08	down
102174959	LOC102174959		0.620635	0.130813	0.210773	-2.24624	8.19833e-10	3.29642e-08	down
106503175	LOC106503175	PREDICTED: Capra hircus uncharacterized LOC106503175 (LOC106503175), ncRNA	2.13818	0.815459	0.381381	-1.3907	1.02323e-09	4.04101e-08	down
108635080	LOC108635080	PREDICTED: Capra hircus collagen alpha-1(III) chain-like (LOC108635080), partial mRNA	0.0001	1.37077	13707.7	13.7427	1.07417e-09	4.21716e-08	up
102180469	TRIOBP	PREDICTED: Capra hircus TRIO and F-actin binding protein (TRIOBP), mRNA	0.792078	0.200323	0.252908	-1.98331	1.68534e-09	6.31835e-08	down
102189403	SALL2	PREDICTED: Capra hircus spalt like transcription factor 2 (SALL2), transcript variant X1, mRNA;PREDICTED: Capra hircus spalt like transcription factor 2 (SALL2), transcript variant X3, mRNA;PREDICTED: Capra hircus spalt like transcription factor 2 (SALL2), transcript variant X4, mRNA;PREDICTED: Capra hircus spalt like transcription factor 2 (SALL2), transcript variant X2, mRNA	0.18849	0.0344115	0.182564	-2.45352	1.82817e-09	6.77748e-08	down
100861132	RAB30	PREDICTED: Capra hircus RAB30, member RAS oncogene family (RAB30), mRNA	0.574989	0.260828	0.453623	-1.14043	2.04577e-09	7.41885e-08	down
108634770	LOC108634770	PREDICTED: Capra hircus basic proline-rich protein-like (LOC108634770), mRNA	0.258953	0.781867	3.01933	1.59423	2.96902e-09	1.04261e-07	up
108633180	LOC108633180		4.32241	1.86889	0.432371	-1.20966	4.7476e-09	1.57179e-07	down
102184308	LOC102184308	PREDICTED: Capra hircus uncharacterized LOC102184308 (LOC102184308), transcript variant X1, ncRNA;PREDICTED: Capra hircus uncharacterized LOC102184308 (LOC102184308), transcript variant X2, ncRNA	0.573328	0.157909	0.275424	-1.86027	6.01075e-09	1.9323e-07	down
102178114	LOC102178114		0.0001	0.612258	6122.58	12.5799	9.1681e-09	2.83763e-07	up
108634738	LOC108634738	PREDICTED: Capra hircus collagen alpha-1(III) chain-like (LOC108634738), mRNA	0.655812	1.53965	2.3477	1.23125	1.08935e-08	3.28757e-07	up
102181596	SPAG8	PREDICTED: Capra hircus sperm associated antigen 8 (SPAG8), transcript variant X2, mRNA;PREDICTED: Capra hircus sperm associated antigen 8 (SPAG8), transcript variant X1, mRNA;PREDICTED: Capra hircus sperm associated antigen 8 (SPAG8), transcript variant X3, mRNA	2.49184	1.21315	0.486847	-1.03846	1.09357e-08	3.29284e-07	down
102170104	SLC9A3R2	PREDICTED: Capra hircus SLC9A3 regulator 2 (SLC9A3R2), transcript variant X1, mRNA;PREDICTED: Capra hircus SLC9A3 regulator 2 (SLC9A3R2), transcript variant X2, mRNA;PREDICTED: Capra hircus SLC9A3 regulator 2 (SLC9A3R2), transcript variant X3, mRNA	2.59325	1.19727	0.461686	-1.11502	1.21765e-08	3.58532e-07	down
102175041	LOC102175041	PREDICTED: Capra hircus uncharacterized LOC102175041 (LOC102175041), transcript variant X4, misc_RNA;PREDICTED: Capra hircus uncharacterized LOC102175041 (LOC102175041), transcript variant X7, misc_RNA;PREDICTED: Capra hircus uncharacterized LOC102175041 (LOC102175041), transcript variant X6, misc_RNA;PREDICTED: Capra hircus uncharacterized LOC102175041 (LOC102175041), transcript variant X3, misc…	0.350416	0.0933513	0.266401	-1.90833	1.64139e-08	4.68783e-07	down
102177693	HOXC11	PREDICTED: Capra hircus homeobox C11 (HOXC11), mRNA	1.07623	0.391155	0.363448	-1.46018	2.79327e-08	7.46498e-07	down
102186611	LOC102186611	PREDICTED: Capra hircus NADH-cytochrome b5 reductase 2 (LOC102186611), transcript variant X2, mRNA;PREDICTED: Capra hircus NADH-cytochrome b5 reductase 2 (LOC102186611), transcript variant X1, mRNA	0.286854	0.745799	2.59992	1.37847	4.87145e-08	1.2256e-06	up
102183843	SRL	PREDICTED: Capra hircus sarcalumenin (SRL), transcript variant X1, mRNA;PREDICTED: Capra hircus sarcalumenin (SRL), transcript variant X2, mRNA	1.18053	0.472502	0.400247	-1.32104	1.09895e-07	2.50016e-06	down
102177005	LOC102177005	PREDICTED: Capra hircus uncharacterized LOC102177005 (LOC102177005), transcript variant X2, ncRNA;PREDICTED: Capra hircus uncharacterized LOC102177005 (LOC102177005), transcript variant X1, ncRNA;PREDICTED: Capra hircus uncharacterized LOC102177005 (LOC102177005), transcript variant X4, ncRNA;PREDICTED: Capra hircus uncharacterized LOC102177005 (LOC102177005), transcript variant X3, ncRNA	2.23196	0.939796	0.421064	-1.24789	1.3536e-07	2.98486e-06	down
108637533	LOC108637533	PREDICTED: Capra hircus uncharacterized LOC108637533 (LOC108637533), transcript variant X2, ncRNA;PREDICTED: Capra hircus uncharacterized LOC108637533 (LOC108637533), transcript variant X1, ncRNA;PREDICTED: Capra hircus uncharacterized LOC108637533 (LOC108637533), transcript variant X3, ncRNA	0.697552	0.320772	0.459854	-1.12075	1.48095e-07	3.2101e-06	down
108636282	LOC108636282		0.32025	1.16484	3.63729	1.86286	1.73333e-07	3.6702e-06	up
102188601	PLEKHH2	PREDICTED: Capra hircus pleckstrin homology, MyTH4 and FERM domain containing H2 (PLEKHH2), mRNA	0.431055	0.18271	0.423867	-1.23831	1.91671e-07	3.97047e-06	down
102170026	NPFF	PREDICTED: Capra hircus neuropeptide FF-amide peptide precursor (NPFF), mRNA	1.23988	0.545972	0.440344	-1.1833	2.11269e-07	4.33249e-06	down
102179639	BEST1	PREDICTED: Capra hircus bestrophin 1 (BEST1), transcript variant X1, mRNA;PREDICTED: Capra hircus bestrophin 1 (BEST1), transcript variant X2, mRNA	1.05685	0.136037	0.128719	-2.9577	2.14559e-07	4.39317e-06	down
108635995	LOC108635995	PREDICTED: Capra hircus uncharacterized LOC108635995 (LOC108635995), transcript variant X1, ncRNA;PREDICTED: Capra hircus uncharacterized LOC108635995 (LOC108635995), transcript variant X2, ncRNA	0.26507	0.0701868	0.264786	-1.9171	2.75728e-07	5.45269e-06	down
106503241	HES7	PREDICTED: Capra hircus hes family bHLH transcription factor 7 (HES7), mRNA	1.48953	0.614553	0.412581	-1.27725	3.12399e-07	6.08743e-06	down
102178142	GLI3	PREDICTED: Capra hircus GLI family zinc finger 3 (GLI3), mRNA	0.277324	0.0991107	0.357382	-1.48446	3.16677e-07	6.13487e-06	down
102178126	EFNA4	PREDICTED: Capra hircus ephrin A4 (EFNA4), transcript variant X2, mRNA;PREDICTED: Capra hircus ephrin A4 (EFNA4), transcript variant X1, mRNA;PREDICTED: Capra hircus ephrin A4 (EFNA4), transcript variant X3, mRNA	4.20497	2.00858	0.477669	-1.06592	3.34712e-07	6.4281e-06	down
106503653	LOC106503653	PREDICTED: Capra hircus uncharacterized LOC106503653 (LOC106503653), transcript variant X11, ncRNA;PREDICTED: Capra hircus uncharacterized LOC106503653 (LOC106503653), transcript variant X15, ncRNA;PREDICTED: Capra hircus uncharacterized LOC106503653 (LOC106503653), transcript variant X4, ncRNA;PREDICTED: Capra hircus uncharacterized LOC106503653 (LOC106503653), transcript variant X16, ncRNA;PRED…	0.200547	0.0676092	0.337125	-1.56864	3.65463e-07	6.90901e-06	down
102175781	LOC102175781	PREDICTED: Capra hircus putative uncharacterized protein FLJ37770 (LOC102175781), mRNA	0.53878	0.2544	0.472179	-1.0826	5.2136e-07	9.49217e-06	down
102170924	KCNJ9	PREDICTED: Capra hircus potassium voltage-gated channel subfamily J member 9 (KCNJ9), transcript variant X2, mRNA;PREDICTED: Capra hircus potassium voltage-gated channel subfamily J member 9 (KCNJ9), transcript variant X1, mRNA	0.485018	0.167842	0.346053	-1.53093	8.45415e-07	1.4537e-05	down
102171182	CENPBD1	PREDICTED: Capra hircus CENPB DNA-binding domain containing 1 (CENPBD1), mRNA	0.581729	1.20455	2.07064	1.05008	9.02521e-07	1.53772e-05	up
102180584	LOC102180584	PREDICTED: Capra hircus BOLA class I histocompatibility antigen, alpha chain BL3-7 (LOC102180584), transcript variant X2, mRNA;PREDICTED: Capra hircus BOLA class I histocompatibility antigen, alpha chain BL3-7 (LOC102180584), transcript variant X1, mRNA	2.86594	0.501973	0.175151	-2.51333	9.28588e-07	1.57635e-05	down
102189927	DOC2A	PREDICTED: Capra hircus double C2 domain alpha (DOC2A), transcript variant X1, mRNA;PREDICTED: Capra hircus double C2 domain alpha (DOC2A), transcript variant X3, mRNA;PREDICTED: Capra hircus double C2 domain alpha (DOC2A), transcript variant X2, mRNA	0.710737	0.201543	0.283569	-1.81823	1.00121e-06	1.67611e-05	down
102187705	KCTD15	PREDICTED: Capra hircus potassium channel tetramerization domain containing 15 (KCTD15), transcript variant X2, mRNA;PREDICTED: Capra hircus potassium channel tetramerization domain containing 15 (KCTD15), transcript variant X3, mRNA;PREDICTED: Capra hircus potassium channel tetramerization domain containing 15 (KCTD15), transcript variant X1, mRNA	0.959629	0.464076	0.4836	-1.04812	1.15989e-06	1.89644e-05	down
102182306	RFX3	PREDICTED: Capra hircus regulatory factor X3 (RFX3), transcript variant X1, mRNA;PREDICTED: Capra hircus regulatory factor X3 (RFX3), transcript variant X3, mRNA;PREDICTED: Capra hircus regulatory factor X3 (RFX3), transcript variant X2, mRNA;PREDICTED: Capra hircus regulatory factor X3 (RFX3), transcript variant X4, mRNA	0.26229	0.109326	0.416814	-1.26252	1.21685e-06	1.96781e-05	down
108633857	LOC108633857	PREDICTED: Capra hircus collagen alpha-2(I) chain-like (LOC108633857), mRNA	1.1655	0.466874	0.40058	-1.31984	1.61391e-06	2.49762e-05	down
102184252	LOC102184252	PREDICTED: Capra hircus cytochrome P450 1B1 (LOC102184252), mRNA	0.377114	0.773115	2.05008	1.03568	1.66554e-06	2.56855e-05	up
106503449	LOC106503449	PREDICTED: Capra hircus uncharacterized LOC106503449 (LOC106503449), ncRNA	0.949377	0.376563	0.396642	-1.33409	1.67479e-06	2.57562e-05	down
108638305	LOC108638305	PREDICTED: Capra hircus uncharacterized LOC108638305 (LOC108638305), ncRNA	0.749802	0.299482	0.399414	-1.32404	1.77379e-06	2.70417e-05	down
102176355	CCDC114	PREDICTED: Capra hircus coiled-coil domain containing 114 (CCDC114), transcript variant X3, mRNA;PREDICTED: Capra hircus coiled-coil domain containing 114 (CCDC114), transcript variant X2, mRNA;PREDICTED: Capra hircus coiled-coil domain containing 114 (CCDC114), transcript variant X5, mRNA;PREDICTED: Capra hircus coiled-coil domain containing 114 (CCDC114), transcript variant X1, mRNA;PREDICTED: …	0.576987	0.256091	0.443842	-1.17188	1.7993e-06	2.73055e-05	down
108638282	LOC108638282	PREDICTED: Capra hircus uncharacterized LOC108638282 (LOC108638282), ncRNA	2.42546	1.05146	0.433511	-1.20586	2.4082e-06	3.55725e-05	down
108634775	LOC108634775	PREDICTED: Capra hircus basic proline-rich protein-like (LOC108634775), partial mRNA	2.49961	12.8517	5.14149	2.36219	2.8752e-06	4.14135e-05	up
106503697	LOC106503697		0.365823	0.108949	0.297819	-1.74749	3.07917e-06	4.38296e-05	down
108637087	LOC108637087	PREDICTED: Capra hircus uncharacterized LOC108637087 (LOC108637087), mRNA	0.73574	0.351944	0.478354	-1.06385	3.25974e-06	4.60551e-05	down
102189791	YPEL2	PREDICTED: Capra hircus yippee like 2 (YPEL2), transcript variant X2, mRNA;PREDICTED: Capra hircus yippee like 2 (YPEL2), transcript variant X6, mRNA;PREDICTED: Capra hircus yippee like 2 (YPEL2), transcript variant X4, mRNA;PREDICTED: Capra hircus yippee like 2 (YPEL2), transcript variant X1, mRNA;PREDICTED: Capra hircus yippee like 2 (YPEL2), transcript variant X3, mRNA;PREDICTED: Capra hircus …	0.173987	0.0609625	0.350385	-1.51299	3.45342e-06	4.85338e-05	down
102178326	JAKMIP3	PREDICTED: Capra hircus Janus kinase and microtubule interacting protein 3 (JAKMIP3), transcript variant X5, mRNA;PREDICTED: Capra hircus Janus kinase and microtubule interacting protein 3 (JAKMIP3), transcript variant X3, mRNA;PREDICTED: Capra hircus Janus kinase and microtubule interacting protein 3 (JAKMIP3), transcript variant X1, mRNA;PREDICTED: Capra hircus Janus kinase and microtubule inte…	0.292274	0.0984946	0.336994	-1.56921	3.54554e-06	4.95669e-05	down
100860801	LIPE	PREDICTED: Capra hircus lipase E, hormone sensitive type (LIPE), transcript variant X1, mRNA;PREDICTED: Capra hircus lipase E, hormone sensitive type (LIPE), transcript variant X2, mRNA;PREDICTED: Capra hircus lipase E, hormone sensitive type (LIPE), transcript variant X3, mRNA	1.01795	0.400016	0.392963	-1.34753	3.62612e-06	5.04812e-05	down
102190818	TMEM102	PREDICTED: Capra hircus transmembrane protein 102 (TMEM102), transcript variant X1, mRNA;PREDICTED: Capra hircus transmembrane protein 102 (TMEM102), transcript variant X3, mRNA;PREDICTED: Capra hircus transmembrane protein 102 (TMEM102), transcript variant X2, mRNA;PREDICTED: Capra hircus transmembrane protein 102 (TMEM102), transcript variant X4, mRNA	6.42934	3.06949	0.477419	-1.06667	3.95981e-06	5.46692e-05	down
102186607	ZNF438	PREDICTED: Capra hircus zinc finger protein 438 (ZNF438), transcript variant X7, mRNA;PREDICTED: Capra hircus zinc finger protein 438 (ZNF438), transcript variant X8, mRNA;PREDICTED: Capra hircus zinc finger protein 438 (ZNF438), transcript variant X3, mRNA;PREDICTED: Capra hircus zinc finger protein 438 (ZNF438), transcript variant X1, mRNA;PREDICTED: Capra hircus zinc finger protein 438 (ZNF438…	0.387158	0.165433	0.427302	-1.22667	4.12135e-06	5.65474e-05	down
102190854	LOC102190854	PREDICTED: Capra hircus uncharacterized LOC102190854 (LOC102190854), transcript variant X1, ncRNA;PREDICTED: Capra hircus uncharacterized LOC102190854 (LOC102190854), transcript variant X2, ncRNA	0.597477	0.229885	0.384759	-1.37797	4.51848e-06	6.16153e-05	down
102189974	RAB39A	PREDICTED: Capra hircus RAB39A, member RAS oncogene family (RAB39A), mRNA	0.300989	0.109973	0.365373	-1.45256	4.75879e-06	6.43388e-05	down
108638515	LOC108638515	PREDICTED: Capra hircus uncharacterized LOC108638515 (LOC108638515), ncRNA	1.94569	0.849279	0.436493	-1.19597	4.80154e-06	6.46798e-05	down
102181714	C18H19orf18	PREDICTED: Capra hircus chromosome 18 C19orf18 homolog (C18H19orf18), mRNA	0.5491	0.205997	0.375153	-1.41445	5.25156e-06	6.9893e-05	down
102185425	FOXO6	PREDICTED: Capra hircus forkhead box O6 (FOXO6), transcript variant X1, mRNA;PREDICTED: Capra hircus forkhead box O6 (FOXO6), transcript variant X2, mRNA	0.28432	0.0921219	0.324008	-1.6259	6.64105e-06	8.49047e-05	down
108637956	LOC108637956	PREDICTED: Capra hircus uncharacterized LOC108637956 (LOC108637956), transcript variant X1, ncRNA;PREDICTED: Capra hircus uncharacterized LOC108637956 (LOC108637956), transcript variant X2, ncRNA	1.86466	0.881195	0.472577	-1.08138	6.96606e-06	8.79613e-05	down
102178403	DAG1	PREDICTED: Capra hircus dystroglycan 1 (DAG1), transcript variant X1, mRNA;PREDICTED: Capra hircus dystroglycan 1 (DAG1), transcript variant X2, mRNA;PREDICTED: Capra hircus dystroglycan 1 (DAG1), transcript variant X3, mRNA	31.7717	7.01935	0.220931	-2.17833	7.02257e-06	8.84232e-05	down
102187159	DNAAF3	PREDICTED: Capra hircus dynein axonemal assembly factor 3 (DNAAF3), transcript variant X1, mRNA;PREDICTED: Capra hircus dynein axonemal assembly factor 3 (DNAAF3), transcript variant X2, mRNA;PREDICTED: Capra hircus dynein axonemal assembly factor 3 (DNAAF3), transcript variant X6, mRNA;PREDICTED: Capra hircus dynein axonemal assembly factor 3 (DNAAF3), transcript variant X4, mRNA;PREDICTED: Capr…	0.933966	0.415396	0.444766	-1.16888	7.21461e-06	9.04988e-05	down
102182799	TTC31	PREDICTED: Capra hircus tetratricopeptide repeat domain 31 (TTC31), mRNA	1.4439	0.70913	0.491123	-1.02584	7.83186e-06	9.74151e-05	down
102191053	GPATCH2L	PREDICTED: Capra hircus G-patch domain containing 2 like (GPATCH2L), transcript variant X1, mRNA;PREDICTED: Capra hircus G-patch domain containing 2 like (GPATCH2L), transcript variant X5, mRNA;PREDICTED: Capra hircus G-patch domain containing 2 like (GPATCH2L), transcript variant X4, mRNA;PREDICTED: Capra hircus G-patch domain containing 2 like (GPATCH2L), transcript variant X6, mRNA;PREDICTED: …	4.32633	1.63299	0.377453	-1.40563	8.32004e-06	0.000102624	down
108636606	LOC108636606	PREDICTED: Capra hircus uncharacterized LOC108636606 (LOC108636606), transcript variant X1, ncRNA;PREDICTED: Capra hircus uncharacterized LOC108636606 (LOC108636606), transcript variant X2, ncRNA	2.78688	1.11089	0.398613	-1.32694	8.43108e-06	0.000103748	down
102185801	GJB3	PREDICTED: Capra hircus gap junction protein beta 3 (GJB3), transcript variant X1, mRNA;PREDICTED: Capra hircus gap junction protein beta 3 (GJB3), transcript variant X2, mRNA	7.1855	17.1675	2.38919	1.25652	9.3495e-06	0.00011312	up
102185968	DCUN1D3	PREDICTED: Capra hircus defective in cullin neddylation 1 domain containing 3 (DCUN1D3), transcript variant X2, mRNA;PREDICTED: Capra hircus defective in cullin neddylation 1 domain containing 3 (DCUN1D3), transcript variant X3, mRNA;PREDICTED: Capra hircus defective in cullin neddylation 1 domain containing 3 (DCUN1D3), transcript variant X1, mRNA;PREDICTED: Capra hircus defective in cullin nedd…	3.09545	1.46796	0.474231	-1.07634	9.70868e-06	0.000116913	down
100860876	RORC	PREDICTED: Capra hircus RAR related orphan receptor C (RORC), transcript variant X11, mRNA;PREDICTED: Capra hircus RAR related orphan receptor C (RORC), transcript variant X5, mRNA;PREDICTED: Capra hircus RAR related orphan receptor C (RORC), transcript variant X10, mRNA;PREDICTED: Capra hircus RAR related orphan receptor C (RORC), transcript variant X8, mRNA;PREDICTED: Capra hircus RAR related o…	0.317062	0.111191	0.350692	-1.51173	1.08068e-05	0.000128532	down
102171226	FGF5	Capra hircus fibroblast growth factor 5 (FGF5), mRNA;PREDICTED: Capra hircus fibroblast growth factor 5 (FGF5), transcript variant X1, mRNA	1.04338	0.384823	0.368825	-1.43899	1.23821e-05	0.000144556	down
102177287	TMEM37	PREDICTED: Capra hircus transmembrane protein 37 (TMEM37), mRNA	2.47059	1.22422	0.495519	-1.01299	1.62231e-05	0.000180832	down
102185724	CACNA1I	PREDICTED: Capra hircus calcium voltage-gated channel subunit alpha1 I (CACNA1I), mRNA	0.175297	0.0754847	0.430611	-1.21554	1.75951e-05	0.000193691	down
102185818	F8	PREDICTED: Capra hircus coagulation factor VIII (F8), mRNA	0.0535293	0.139646	2.60878	1.38337	1.76417e-05	0.000193767	up
106502052	ZNF775	PREDICTED: Capra hircus zinc finger protein 775 (ZNF775), transcript variant X4, mRNA;PREDICTED: Capra hircus zinc finger protein 775 (ZNF775), transcript variant X1, mRNA;PREDICTED: Capra hircus zinc finger protein 775 (ZNF775), transcript variant X2, mRNA;PREDICTED: Capra hircus zinc finger protein 775 (ZNF775), transcript variant X3, mRNA;PREDICTED: Capra hircus zinc finger protein 775 (ZNF775…	0.759653	0.378141	0.497782	-1.00642	1.78153e-05	0.000195147	down
108637765	LOC108637765	PREDICTED: Capra hircus uncharacterized LOC108637765 (LOC108637765), transcript variant X2, ncRNA;PREDICTED: Capra hircus uncharacterized LOC108637765 (LOC108637765), transcript variant X1, ncRNA;PREDICTED: Capra hircus uncharacterized LOC108637765 (LOC108637765), transcript variant X3, ncRNA	0.796269	0.335477	0.421311	-1.24704	1.99204e-05	0.000214673	down
102168594	AMIGO1	PREDICTED: Capra hircus adhesion molecule with Ig like domain 1 (AMIGO1), transcript variant X1, mRNA;PREDICTED: Capra hircus adhesion molecule with Ig like domain 1 (AMIGO1), transcript variant X2, mRNA	1.62114	0.701888	0.432959	-1.2077	2.10008e-05	0.000224138	down
102189598	SAMD10	PREDICTED: Capra hircus sterile alpha motif domain containing 10 (SAMD10), transcript variant X1, mRNA;PREDICTED: Capra hircus sterile alpha motif domain containing 10 (SAMD10), transcript variant X2, mRNA	1.10838	0.51028	0.460382	-1.1191	2.12893e-05	0.000226853	down
102176573	MAPRE2	PREDICTED: Capra hircus microtubule associated protein RP/EB family member 2 (MAPRE2), transcript variant X1, mRNA;PREDICTED: Capra hircus microtubule associated protein RP/EB family member 2 (MAPRE2), transcript variant X2, mRNA;PREDICTED: Capra hircus microtubule associated protein RP/EB family member 2 (MAPRE2), transcript variant X3, mRNA	7.99434	16.6982	2.08876	1.06265	2.29959e-05	0.000242899	up
102185858	ADCY7	PREDICTED: Capra hircus adenylate cyclase 7 (ADCY7), transcript variant X3, mRNA;PREDICTED: Capra hircus adenylate cyclase 7 (ADCY7), transcript variant X4, mRNA;PREDICTED: Capra hircus adenylate cyclase 7 (ADCY7), transcript variant X5, mRNA;PREDICTED: Capra hircus adenylate cyclase 7 (ADCY7), transcript variant X2, mRNA;PREDICTED: Capra hircus adenylate cyclase 7 (ADCY7), transcript variant X1,…	2.11216	0.850245	0.402548	-1.31277	2.54409e-05	0.000263497	down
102186423	JPH3	PREDICTED: Capra hircus junctophilin 3 (JPH3), mRNA	0.22726	0.088278	0.388445	-1.36422	3.16183e-05	0.000314036	down
102180913	PITX3	PREDICTED: Capra hircus paired like homeodomain 3 (PITX3), transcript variant X1, mRNA;PREDICTED: Capra hircus paired like homeodomain 3 (PITX3), transcript variant X2, mRNA	0.738642	0.321803	0.435668	-1.1987	3.30478e-05	0.000325561	down
102175078	PRSS33	PREDICTED: Capra hircus protease, serine 33 (PRSS33), mRNA	1.70448	0.752644	0.441569	-1.17929	3.3645e-05	0.000329493	down
102178972	PLCE1	PREDICTED: Capra hircus phospholipase C epsilon 1 (PLCE1), transcript variant X1, mRNA;PREDICTED: Capra hircus phospholipase C epsilon 1 (PLCE1), transcript variant X2, mRNA	0.044403	0.106681	2.40257	1.26458	3.77265e-05	0.000363315	up
108637987	LOC108637987	PREDICTED: Capra hircus uncharacterized LOC108637987 (LOC108637987), ncRNA	0.475167	0.144525	0.304156	-1.71712	3.82211e-05	0.000367281	down
106501749	FOXC2	PREDICTED: Capra hircus forkhead box C2 (FOXC2), mRNA	0.127019	0.317797	2.50196	1.32306	4.40815e-05	0.000413738	up
102188974	MEIOC	PREDICTED: Capra hircus meiosis specific with coiled-coil domain (MEIOC), mRNA	0.108905	0.230357	2.11521	1.0808	5.03402e-05	0.000461416	up
108634603	LOC108634603	PREDICTED: Capra hircus uncharacterized LOC108634603 (LOC108634603), ncRNA	1.21188	0.524827	0.433069	-1.20733	5.0963e-05	0.000465714	down
102174633	KIF5A	PREDICTED: Capra hircus kinesin family member 5A (KIF5A), transcript variant X1, mRNA;PREDICTED: Capra hircus kinesin family member 5A (KIF5A), transcript variant X2, mRNA	0.338575	0.167744	0.495442	-1.01321	5.31078e-05	0.000481479	down
106502172	LOC106502172	PREDICTED: Capra hircus uncharacterized LOC106502172 (LOC106502172), ncRNA	0.458991	0.175911	0.383256	-1.38362	6.16154e-05	0.000547788	down
102168556	LOC102168556	PREDICTED: Capra hircus uncharacterized LOC102168556 (LOC102168556), ncRNA	1.32266	0.505859	0.382457	-1.38663	6.66003e-05	0.000583915	down
102181435	THPO	PREDICTED: Capra hircus thrombopoietin (THPO), transcript variant X1, mRNA;PREDICTED: Capra hircus thrombopoietin (THPO), transcript variant X3, mRNA;PREDICTED: Capra hircus thrombopoietin (THPO), transcript variant X2, mRNA	1.98613	0.916615	0.461507	-1.11558	6.86192e-05	0.000598854	down
102169841	GNB3	PREDICTED: Capra hircus G protein subunit beta 3 (GNB3), mRNA	0.761581	0.26789	0.351755	-1.50736	7.38925e-05	0.000635294	down
102184670	KCTD6	PREDICTED: Capra hircus potassium channel tetramerization domain containing 6 (KCTD6), transcript variant X1, mRNA;PREDICTED: Capra hircus potassium channel tetramerization domain containing 6 (KCTD6), transcript variant X4, mRNA;PREDICTED: Capra hircus potassium channel tetramerization domain containing 6 (KCTD6), transcript variant X2, mRNA;PREDICTED: Capra hircus potassium channel tetramerizat…	0.843708	1.7138	2.03127	1.02238	7.428e-05	0.000638213	up
102180118	CAPS	PREDICTED: Capra hircus calcyphosine (CAPS), mRNA	0.40438	0.918761	2.27203	1.18398	7.5773e-05	0.000649364	up
102174774	THAP8	PREDICTED: Capra hircus THAP domain containing 8 (THAP8), transcript variant X1, mRNA;PREDICTED: Capra hircus THAP domain containing 8 (THAP8), transcript variant X2, mRNA	1.45341	0.682929	0.469879	-1.08964	7.87431e-05	0.0006705	down
102171335	CARD19	PREDICTED: Capra hircus caspase recruitment domain family member 19 (CARD19), transcript variant X3, misc_RNA;PREDICTED: Capra hircus caspase recruitment domain family member 19 (CARD19), transcript variant X1, mRNA;PREDICTED: Capra hircus caspase recruitment domain family member 19 (CARD19), transcript variant X2, mRNA	2.95679	1.47144	0.497647	-1.00681	8.19116e-05	0.000693046	down
102184116	LOC102184116	PREDICTED: Capra hircus uncharacterized LOC102184116 (LOC102184116), transcript variant X1, mRNA;PREDICTED: Capra hircus uncharacterized LOC102184116 (LOC102184116), transcript variant X2, mRNA	0.904783	0.44306	0.489687	-1.03007	8.73025e-05	0.000728013	down
102191098	PRRT2	PREDICTED: Capra hircus proline rich transmembrane protein 2 (PRRT2), mRNA	0.928252	0.406898	0.438348	-1.18985	8.9627e-05	0.000744598	down
102173909	LOC102173909	PREDICTED: Capra hircus uncharacterized LOC102173909 (LOC102173909), mRNA	0.117973	0.280548	2.37806	1.24979	0.000102356	0.000831148	up
102184896	WNT9A	PREDICTED: Capra hircus Wnt family member 9A (WNT9A), mRNA	0.429984	0.194875	0.453215	-1.14173	0.00011795	0.000935513	down
102182798	TSGA10	PREDICTED: Capra hircus testis specific 10 (TSGA10), mRNA	0.646129	0.309657	0.479249	-1.06115	0.000127576	0.00100053	down
102177676	TXNDC2	PREDICTED: Capra hircus thioredoxin domain containing 2 (TXNDC2), mRNA	0.286103	0.605373	2.11593	1.08129	0.000128254	0.00100419	up
102173434	RHBDL1	PREDICTED: Capra hircus rhomboid like 1 (RHBDL1), mRNA	0.862521	0.351694	0.407751	-1.29424	0.000133877	0.00103893	down
108633371	LOC108633371	PREDICTED: Capra hircus uncharacterized LOC108633371 (LOC108633371), transcript variant X1, ncRNA;PREDICTED: Capra hircus uncharacterized LOC108633371 (LOC108633371), transcript variant X2, ncRNA	0.226958	0.49668	2.18842	1.12989	0.000155978	0.00117962	up
102168443	RGL3	PREDICTED: Capra hircus ral guanine nucleotide dissociation stimulator like 3 (RGL3), transcript variant X1, mRNA;PREDICTED: Capra hircus ral guanine nucleotide dissociation stimulator like 3 (RGL3), transcript variant X2, mRNA;PREDICTED: Capra hircus ral guanine nucleotide dissociation stimulator like 3 (RGL3), transcript variant X3, mRNA	0.667924	0.308111	0.461297	-1.11623	0.000160723	0.00120783	down
102183457	RGMA	PREDICTED: Capra hircus repulsive guidance molecule family member a (RGMA), mRNA	0.498931	0.240858	0.482748	-1.05066	0.000200624	0.00145987	down
102191637	TNFRSF18	PREDICTED: Capra hircus TNF receptor superfamily member 18 (TNFRSF18), transcript variant X2, mRNA;PREDICTED: Capra hircus TNF receptor superfamily member 18 (TNFRSF18), transcript variant X1, mRNA	2.26356	1.06155	0.468975	-1.09242	0.000208257	0.00150717	down
102172562	PRR5L	PREDICTED: Capra hircus proline rich 5 like (PRR5L), transcript variant X2, mRNA;PREDICTED: Capra hircus proline rich 5 like (PRR5L), transcript variant X3, mRNA;PREDICTED: Capra hircus proline rich 5 like (PRR5L), transcript variant X1, mRNA;PREDICTED: Capra hircus proline rich 5 like (PRR5L), transcript variant X4, mRNA;PREDICTED: Capra hircus proline rich 5 like (PRR5L), transcript variant X5,…	0.338552	0.148369	0.438245	-1.19019	0.000232805	0.00165336	down
102190298	SLC38A4	PREDICTED: Capra hircus solute carrier family 38 member 4 (SLC38A4), transcript variant X2, mRNA;PREDICTED: Capra hircus solute carrier family 38 member 4 (SLC38A4), transcript variant X1, mRNA	0.985124	0.442075	0.448751	-1.15601	0.000233124	0.00165474	down
102182803	CACNB2	PREDICTED: Capra hircus calcium voltage-gated channel auxiliary subunit beta 2 (CACNB2), transcript variant X6, mRNA;PREDICTED: Capra hircus calcium voltage-gated channel auxiliary subunit beta 2 (CACNB2), transcript variant X2, mRNA;PREDICTED: Capra hircus calcium voltage-gated channel auxiliary subunit beta 2 (CACNB2), transcript variant X1, mRNA;PREDICTED: Capra hircus calcium voltage-gated ch…	0.199822	0.0868414	0.434594	-1.20226	0.000251906	0.00176546	down
102184280	WNK4	PREDICTED: Capra hircus WNK lysine deficient protein kinase 4 (WNK4), transcript variant X4, mRNA;PREDICTED: Capra hircus WNK lysine deficient protein kinase 4 (WNK4), transcript variant X1, mRNA;PREDICTED: Capra hircus WNK lysine deficient protein kinase 4 (WNK4), transcript variant X3, mRNA;PREDICTED: Capra hircus WNK lysine deficient protein kinase 4 (WNK4), transcript variant X2, mRNA	0.377439	0.167623	0.444105	-1.17103	0.000259799	0.00181314	down
102188250	ADAP2	PREDICTED: Capra hircus ArfGAP with dual PH domains 2 (ADAP2), transcript variant X3, mRNA;PREDICTED: Capra hircus ArfGAP with dual PH domains 2 (ADAP2), transcript variant X4, mRNA;PREDICTED: Capra hircus ArfGAP with dual PH domains 2 (ADAP2), transcript variant X1, mRNA;PREDICTED: Capra hircus ArfGAP with dual PH domains 2 (ADAP2), transcript variant X2, mRNA;PREDICTED: Capra hircus ArfGAP with…	0.48284	0.195667	0.405241	-1.30315	0.000320741	0.00214808	down
102178688	IQCK	PREDICTED: Capra hircus IQ motif containing K (IQCK), mRNA	0.709763	0.347106	0.489044	-1.03196	0.000366866	0.00238875	down
102187171	LOC102187171	PREDICTED: Capra hircus wiskott-Aldrich syndrome protein family member 1-like (LOC102187171), mRNA	1.22381	0.224419	0.183377	-2.44712	0.000390916	0.0025163	down
102185379	PLAG1	PREDICTED: Capra hircus PLAG1 zinc finger (PLAG1), transcript variant X2, mRNA;PREDICTED: Capra hircus PLAG1 zinc finger (PLAG1), transcript variant X4, mRNA;PREDICTED: Capra hircus PLAG1 zinc finger (PLAG1), transcript variant X1, mRNA;PREDICTED: Capra hircus PLAG1 zinc finger (PLAG1), transcript variant X3, mRNA	0.168154	0.0802992	0.477534	-1.06632	0.000390992	0.0025163	down
102172019	LOC102172019	PREDICTED: Capra hircus translation initiation factor IF-2-like (LOC102172019), mRNA	0.387805	0.172822	0.445642	-1.16604	0.000393189	0.00252922	down
106502407	LOC106502407	PREDICTED: Capra hircus uncharacterized LOC106502407 (LOC106502407), ncRNA	0.456875	0.214886	0.470338	-1.08823	0.000400303	0.00256506	down
102171644	SLC8A2	PREDICTED: Capra hircus solute carrier family 8 member A2 (SLC8A2), transcript variant X1, misc_RNA;PREDICTED: Capra hircus solute carrier family 8 member A2 (SLC8A2), transcript variant X2, mRNA;PREDICTED: Capra hircus solute carrier family 8 member A2 (SLC8A2), transcript variant X3, misc_RNA	0.194354	0.0884861	0.455283	-1.13516	0.00042323	0.00268376	down
102171134	CTSW	PREDICTED: Capra hircus cathepsin W (CTSW), mRNA	0.971993	0.454041	0.467123	-1.09812	0.000515463	0.00316434	down
102181431	LOC102181431	PREDICTED: Capra hircus keratin-associated protein 13-1 (LOC102181431), mRNA	0.415059	0.955894	2.30303	1.20353	0.000582743	0.00351415	up
108634623	PSCA	PREDICTED: Capra hircus prostate stem cell antigen (PSCA), mRNA	1.30781	0.637907	0.487767	-1.03574	0.000610464	0.00365715	down
102176547	GLTP	PREDICTED: Capra hircus glycolipid transfer protein (GLTP), transcript variant X1, mRNA;PREDICTED: Capra hircus glycolipid transfer protein (GLTP), transcript variant X2, mRNA	28.3492	58.063	2.04813	1.03431	0.00063379	0.00377241	up
102188440	FZD2	PREDICTED: Capra hircus frizzled class receptor 2 (FZD2), mRNA	0.623541	0.29459	0.472446	-1.08178	0.000689643	0.00404515	down
106503097	IRX3	PREDICTED: Capra hircus iroquois homeobox 3 (IRX3), transcript variant X2, mRNA;PREDICTED: Capra hircus iroquois homeobox 3 (IRX3), transcript variant X3, misc_RNA;PREDICTED: Capra hircus iroquois homeobox 3 (IRX3), transcript variant X1, mRNA	1.50031	3.73518	2.4896	1.31591	0.000802074	0.00458539	up
102183272	PLCL2	PREDICTED: Capra hircus phospholipase C like 2 (PLCL2), transcript variant X1, mRNA;PREDICTED: Capra hircus phospholipase C like 2 (PLCL2), transcript variant X2, mRNA;PREDICTED: Capra hircus phospholipase C like 2 (PLCL2), transcript variant X4, misc_RNA;PREDICTED: Capra hircus phospholipase C like 2 (PLCL2), transcript variant X3, mRNA	0.205453	0.412946	2.00993	1.00714	0.00082901	0.00471106	up
102187803	DLG4	PREDICTED: Capra hircus discs large MAGUK scaffold protein 4 (DLG4), transcript variant X2, mRNA;PREDICTED: Capra hircus discs large MAGUK scaffold protein 4 (DLG4), transcript variant X1, mRNA;PREDICTED: Capra hircus discs large MAGUK scaffold protein 4 (DLG4), transcript variant X3, mRNA;PREDICTED: Capra hircus discs large MAGUK scaffold protein 4 (DLG4), transcript variant X5, misc_RNA;PREDICT…	0.363159	0.152649	0.420337	-1.25038	0.000838904	0.00475307	down
102178635	LOC102178635	PREDICTED: Capra hircus uncharacterized LOC102178635 (LOC102178635), transcript variant X1, ncRNA;PREDICTED: Capra hircus uncharacterized LOC102178635 (LOC102178635), transcript variant X2, ncRNA	1.87747	0.84875	0.452071	-1.14538	0.000941059	0.00520555	down
102171737	ETV2	PREDICTED: Capra hircus ETS variant 2 (ETV2), mRNA	1.94624	0.962799	0.494697	-1.01538	0.000972111	0.005344	down
102176796	FAM166B	PREDICTED: Capra hircus family with sequence similarity 166 member B (FAM166B), transcript variant X1, mRNA;PREDICTED: Capra hircus family with sequence similarity 166 member B (FAM166B), transcript variant X2, mRNA	0.554306	0.249755	0.450573	-1.15017	0.00126849	0.00663613	down
102179602	LOC102179602		1.28672	0.588472	0.457342	-1.12865	0.00127004	0.00664138	down
102168593	LOC102168593	PREDICTED: Capra hircus uncharacterized LOC102168593 (LOC102168593), transcript variant X2, ncRNA;PREDICTED: Capra hircus uncharacterized LOC102168593 (LOC102168593), transcript variant X3, ncRNA;PREDICTED: Capra hircus uncharacterized LOC102168593 (LOC102168593), transcript variant X1, ncRNA	0.420614	0.209057	0.497029	-1.0086	0.00157094	0.00792254	down
102178709	BRSK2	PREDICTED: Capra hircus BR serine/threonine kinase 2 (BRSK2), transcript variant X4, mRNA;PREDICTED: Capra hircus BR serine/threonine kinase 2 (BRSK2), transcript variant X7, misc_RNA;PREDICTED: Capra hircus BR serine/threonine kinase 2 (BRSK2), transcript variant X3, mRNA;PREDICTED: Capra hircus BR serine/threonine kinase 2 (BRSK2), transcript variant X2, mRNA;PREDICTED: Capra hircus BR serine/t…	0.222184	0.108961	0.490407	-1.02795	0.00178201	0.00878072	down
102179344	VPS37D	PREDICTED: Capra hircus VPS37D, ESCRT-I subunit (VPS37D), mRNA	0.63617	0.268631	0.422262	-1.24379	0.00193255	0.00937672	down
102188305	CD70	PREDICTED: Capra hircus CD70 molecule (CD70), mRNA	1.7449	0.816732	0.468068	-1.09521	0.00229197	0.0107577	down
102181070	NTF4	PREDICTED: Capra hircus neurotrophin 4 (NTF4), mRNA	0.982136	0.318052	0.323837	-1.62666	0.00229533	0.0107679	down
102188225	SPTB	PREDICTED: Capra hircus spectrin beta, erythrocytic (SPTB), mRNA	0.0744657	0.150472	2.02069	1.01484	0.00241459	0.011256	up
102172004	ZBTB32	PREDICTED: Capra hircus zinc finger and BTB domain containing 32 (ZBTB32), transcript variant X1, mRNA;PREDICTED: Capra hircus zinc finger and BTB domain containing 32 (ZBTB32), transcript variant X2, mRNA;PREDICTED: Capra hircus zinc finger and BTB domain containing 32 (ZBTB32), transcript variant X3, mRNA;PREDICTED: Capra hircus zinc finger and BTB domain containing 32 (ZBTB32), transcript vari…	0.210175	0.0940603	0.447533	-1.15993	0.00254819	0.0117471	down
102172137	LOC102172137	PREDICTED: Capra hircus uncharacterized LOC102172137 (LOC102172137), ncRNA	0.544911	0.268994	0.493647	-1.01845	0.00264438	0.0121442	down
102178227	CDC42SE1	PREDICTED: Capra hircus CDC42 small effector 1 (CDC42SE1), transcript variant X1, mRNA;PREDICTED: Capra hircus CDC42 small effector 1 (CDC42SE1), transcript variant X3, misc_RNA;PREDICTED: Capra hircus CDC42 small effector 1 (CDC42SE1), transcript variant X2, mRNA	41.3354	84.1904	2.03676	1.02628	0.00277563	0.0126035	up
102184780	GPR85	PREDICTED: Capra hircus G protein-coupled receptor 85 (GPR85), transcript variant X3, mRNA;PREDICTED: Capra hircus G protein-coupled receptor 85 (GPR85), transcript variant X2, mRNA;PREDICTED: Capra hircus G protein-coupled receptor 85 (GPR85), transcript variant X4, misc_RNA;PREDICTED: Capra hircus G protein-coupled receptor 85 (GPR85), transcript variant X1, mRNA	0.28672	0.143262	0.499657	-1.00099	0.00281107	0.012721	down
106503176	LOC106503176	PREDICTED: Capra hircus uncharacterized LOC106503176 (LOC106503176), transcript variant X2, ncRNA;PREDICTED: Capra hircus uncharacterized LOC106503176 (LOC106503176), transcript variant X3, ncRNA;PREDICTED: Capra hircus uncharacterized LOC106503176 (LOC106503176), transcript variant X1, ncRNA	0.333743	0.148546	0.445091	-1.16783	0.00291882	0.013115	down
102182992	DFFB	PREDICTED: Capra hircus DNA fragmentation factor subunit beta (DFFB), transcript variant X2, mRNA;PREDICTED: Capra hircus DNA fragmentation factor subunit beta (DFFB), transcript variant X1, mRNA;PREDICTED: Capra hircus DNA fragmentation factor subunit beta (DFFB), transcript variant X3, mRNA	5.13427	2.34318	0.456381	-1.13169	0.00452592	0.0186314	down
102186427	NKPD1	PREDICTED: Capra hircus NTPase, KAP family P-loop domain containing 1 (NKPD1), transcript variant X1, mRNA;PREDICTED: Capra hircus NTPase, KAP family P-loop domain containing 1 (NKPD1), transcript variant X3, mRNA;PREDICTED: Capra hircus NTPase, KAP family P-loop domain containing 1 (NKPD1), transcript variant X2, mRNA;PREDICTED: Capra hircus NTPase, KAP family P-loop domain containing 1 (NKPD1),…	0.317235	0.126331	0.398226	-1.32834	0.00485386	0.0196651	down
102190234	WDR72	PREDICTED: Capra hircus WD repeat domain 72 (WDR72), mRNA	0.338063	0.156247	0.462184	-1.11346	0.00650579	0.0249526	down
106502688	LOC106502688	PREDICTED: Capra hircus basic proline-rich protein (LOC106502688), ncRNA	0.225445	1.39006	6.16587	2.6243	0.00919607	0.0328588	up
106503930	LOC106503930	PREDICTED: Capra hircus interferon alpha-inducible protein 27, mitochondrial (LOC106503930), transcript variant X1, mRNA;PREDICTED: Capra hircus interferon alpha-inducible protein 27, mitochondrial (LOC106503930), transcript variant X2, mRNA;PREDICTED: Capra hircus interferon alpha-inducible protein 27, mitochondrial (LOC106503930), transcript variant X3, mRNA;PREDICTED: Capra hircus interferon a…	1.5386	0.738454	0.479953	-1.05904	0.010213	0.035864	down
102176404	TUBA8	PREDICTED: Capra hircus tubulin alpha 8 (TUBA8), mRNA	0.757622	0.368136	0.48591	-1.04124	0.012049	0.0407729	down
102184100	TNFAIP6	PREDICTED: Capra hircus TNF alpha induced protein 6 (TNFAIP6), mRNA	0.730175	0.361683	0.495337	-1.01352	0.0134311	0.0444221	down
102176255	B3GNT9	PREDICTED: Capra hircus UDP-GlcNAc:betaGal beta-1,3-N-acetylglucosaminyltransferase 9 (B3GNT9), transcript variant X2, mRNA;PREDICTED: Capra hircus UDP-GlcNAc:betaGal beta-1,3-N-acetylglucosaminyltransferase 9 (B3GNT9), transcript variant X3, mRNA;PREDICTED: Capra hircus UDP-GlcNAc:betaGal beta-1,3-N-acetylglucosaminyltransferase 9 (B3GNT9), transcript variant X1, mRNA	0.290023	0.0824861	0.284412	-1.81394	0.0169195	0.0529964	down
102168382	LOC102168382	PREDICTED: Capra hircus cullin-2 pseudogene (LOC102168382), misc_RNA	0.328344	1.20793	3.67885	1.87926	0.0194147	0.0588187	up
102182548	KLHDC8B	PREDICTED: Capra hircus kelch domain containing 8B (KLHDC8B), mRNA	0.476872	0.160279	0.336104	-1.57302	0.0265333	0.0751185	down
102181330	GAPDHS	PREDICTED: Capra hircus glyceraldehyde-3-phosphate dehydrogenase, spermatogenic (GAPDHS), mRNA	0.717157	0.344309	0.480102	-1.05859	0.0304765	0.0833736	down
102172118	LOC102172118		0.812443	0.403823	0.497048	-1.00854	0.0439011	0.110995	down
