# Supplementary material for: The mRNA and miRNA profiles of goat bronchial epithelial cells stimulated by Pasteurella multocida strains of serotype A and D
Source: PeerJ. 2022 Mar 18;10:e13047. doi: 10.7717/peerj.13047 (PMC8935994; doi:10.7717/peerj.13047)
Supplement: Table S2 [file peerj-10-13047-s002.xlsx]

## Sheet: Ctrl vs D_T4h
Total differentially expressed genes in the P. multocida strain serotype D- stimulated group
gene_id	gene_name	Description	mean Ctrl	mean D_T4h	fc	log2(fc)	p-value	q-value	regulation
102168845	LOC102168845	PREDICTED: Capra hircus uncharacterized LOC102168845 (LOC102168845), transcript variant X1, ncRNA;PREDICTED: Capra hircus uncharacterized LOC102168845 (LOC102168845), transcript variant X2, ncRNA	11.5162	1.64578	0.142909	-2.80683	2.58954e-75	3.44901e-71	down
102176573	MAPRE2	PREDICTED: Capra hircus microtubule associated protein RP/EB family member 2 (MAPRE2), transcript variant X1, mRNA;PREDICTED: Capra hircus microtubule associated protein RP/EB family member 2 (MAPRE2), transcript variant X2, mRNA;PREDICTED: Capra hircus microtubule associated protein RP/EB family member 2 (MAPRE2), transcript variant X3, mRNA	7.99434	21.6817	2.71213	1.43942	3.64116e-59	2.42483e-55	up
102183379	TXNIP	PREDICTED: Capra hircus thioredoxin interacting protein (TXNIP), mRNA	68.7362	33.1829	0.482757	-1.05063	1.55011e-51	6.88195e-48	down
102176667	DDIT4	PREDICTED: Capra hircus DNA damage inducible transcript 4 (DDIT4), mRNA	124.935	61.8721	0.495233	-1.01382	1.20708e-49	4.01926e-46	down
108635303	LOC108635303	PREDICTED: Capra hircus collagen alpha-1(I) chain-like (LOC108635303), partial mRNA	0.803709	4.94313	6.15039	2.62068	6.97913e-48	1.8591e-44	up
108635081	LOC108635081	PREDICTED: Capra hircus translation initiation factor IF-2-like (LOC108635081), mRNA	22.6921	55.3683	2.43999	1.28687	2.38966e-46	5.30464e-43	up
102185060	C27H8orf4	PREDICTED: Capra hircus chromosome 27 C8orf4 homolog (C27H8orf4), mRNA	72.3411	30.1641	0.41697	-1.26198	9.74208e-46	1.85364e-42	down
102183627	ZFP36	PREDICTED: Capra hircus ZFP36 ring finger protein (ZFP36), mRNA	62.5136	30.6527	0.490337	-1.02815	1.32058e-31	1.9543e-28	down
102191672	ZNF518A	PREDICTED: Capra hircus zinc finger protein 518A (ZNF518A), transcript variant X3, mRNA;PREDICTED: Capra hircus zinc finger protein 518A (ZNF518A), transcript variant X1, mRNA;PREDICTED: Capra hircus zinc finger protein 518A (ZNF518A), transcript variant X2, mRNA;PREDICTED: Capra hircus zinc finger protein 518A (ZNF518A), transcript variant X5, mRNA;PREDICTED: Capra hircus zinc finger protein 518…	0.954852	2.83541	2.96948	1.57021	2.63162e-25	2.92088e-22	up
102189824	FAM45A	PREDICTED: Capra hircus family with sequence similarity 45 member A (FAM45A), transcript variant X1, mRNA;PREDICTED: Capra hircus family with sequence similarity 45 member A (FAM45A), transcript variant X3, mRNA;PREDICTED: Capra hircus family with sequence similarity 45 member A (FAM45A), transcript variant X2, mRNA;PREDICTED: Capra hircus family with sequence similarity 45 member A (FAM45A), tra…	5.90002	13.5296	2.29315	1.19733	1.57837e-22	1.40149e-19	up
102183116	RSRP1	PREDICTED: Capra hircus arginine and serine rich protein 1 (RSRP1), transcript variant X2, misc_RNA;PREDICTED: Capra hircus arginine and serine rich protein 1 (RSRP1), transcript variant X3, misc_RNA;PREDICTED: Capra hircus arginine and serine rich protein 1 (RSRP1), transcript variant X1, mRNA	14.8657	6.81313	0.458311	-1.1256	1.57978e-20	1.23771e-17	down
108634738	LOC108634738	PREDICTED: Capra hircus collagen alpha-1(III) chain-like (LOC108634738), mRNA	0.655812	2.33898	3.56655	1.83453	4.81306e-19	3.05262e-16	up
106503175	LOC106503175	PREDICTED: Capra hircus uncharacterized LOC106503175 (LOC106503175), ncRNA	2.13818	0.553585	0.258905	-1.9495	1.23147e-18	7.45542e-16	down
108635296	LOC108635296	PREDICTED: Capra hircus collagen alpha-1(I) chain-like (LOC108635296), partial mRNA	0.373162	1.47634	3.95629	1.98415	1.28173e-16	6.56593e-14	up
102175154	LOC102175154	PREDICTED: Capra hircus uncharacterized LOC102175154 (LOC102175154), ncRNA	4.16347	9.37791	2.25243	1.17148	1.64998e-14	5.78319e-12	up
108634577	LOC108634577	PREDICTED: Capra hircus collagen alpha-1(I) chain-like (LOC108634577), mRNA	1.371	4.64483	3.3879	1.76039	3.42842e-14	1.17085e-11	up
102183178	LOC102183178	PREDICTED: Capra hircus 60S ribosomal protein L35a-like (LOC102183178), transcript variant X1, mRNA;PREDICTED: Capra hircus 60S ribosomal protein L35a-like (LOC102183178), transcript variant X2, mRNA	8.19739	0.0001	1.2199e-05	-16.3229	6.80768e-14	2.10864e-11	down
108637533	LOC108637533	PREDICTED: Capra hircus uncharacterized LOC108637533 (LOC108637533), transcript variant X2, ncRNA;PREDICTED: Capra hircus uncharacterized LOC108637533 (LOC108637533), transcript variant X1, ncRNA;PREDICTED: Capra hircus uncharacterized LOC108637533 (LOC108637533), transcript variant X3, ncRNA	0.697552	0.207158	0.296978	-1.75157	9.65724e-14	2.92329e-11	down
102187162	LOC102187162	PREDICTED: Capra hircus uncharacterized LOC102187162 (LOC102187162), ncRNA	12.8833	25.994	2.01765	1.01268	1.81365e-13	5.36799e-11	up
104795714	MIR1248	Capra hircus microRNA 1248 (MIR1248), microRNA	3.33899	17.1109	5.12456	2.35743	5.4127e-13	1.50191e-10	up
108637154	LOC108637154	PREDICTED: Capra hircus uncharacterized LOC108637154 (LOC108637154), ncRNA	1.14274	0.200498	0.175453	-2.51084	1.06243e-12	2.72124e-10	down
102184859	LOC102184859	PREDICTED: Capra hircus low affinity immunoglobulin gamma Fc region receptor II (LOC102184859), transcript variant X1, mRNA;PREDICTED: Capra hircus low affinity immunoglobulin gamma Fc region receptor II (LOC102184859), transcript variant X2, mRNA	0.965173	0.240222	0.248891	-2.00642	2.04888e-11	4.40145e-09	down
108634774	LOC108634774	PREDICTED: Capra hircus collagen alpha-1(I) chain-like (LOC108634774), mRNA	2.76092	13.6363	4.93904	2.30423	5.79474e-11	1.13946e-08	up
108635404	LOC108635404	PREDICTED: Capra hircus collagen alpha-1(I) chain-like (LOC108635404), partial mRNA	4.33324	10.0816	2.32658	1.21821	6.36897e-11	1.21183e-08	up
106503569	LOC106503569	PREDICTED: Capra hircus uncharacterized LOC106503569 (LOC106503569), ncRNA	4.09435	1.96949	0.481026	-1.05581	2.34987e-10	3.77083e-08	down
108638120	LOC108638120	PREDICTED: Capra hircus uncharacterized LOC108638120 (LOC108638120), ncRNA	1.12945	0.297364	0.263281	-1.92532	2.53442e-10	3.97129e-08	down
100860805	SPP1	Capra hircus secreted phosphoprotein 1 (SPP1), mRNA;PREDICTED: Capra hircus secreted phosphoprotein 1 (SPP1), transcript variant X1, mRNA	10.5297	4.74653	0.450774	-1.14952	2.6522e-10	4.10752e-08	down
102184946	LOC102184946	PREDICTED: Capra hircus uncharacterized LOC102184946 (LOC102184946), transcript variant X3, ncRNA;PREDICTED: Capra hircus uncharacterized LOC102184946 (LOC102184946), transcript variant X2, ncRNA;PREDICTED: Capra hircus uncharacterized LOC102184946 (LOC102184946), transcript variant X1, ncRNA	5.12717	2.49754	0.487119	-1.03765	9.29807e-10	1.36089e-07	down
102181811	LOC102181811	PREDICTED: Capra hircus multidrug resistance-associated protein 1 (LOC102181811), transcript variant X1, mRNA;PREDICTED: Capra hircus multidrug resistance-associated protein 1 (LOC102181811), transcript variant X2, mRNA	0.290671	0.068477	0.235582	-2.0857	1.55689e-09	2.13775e-07	down
108633896	KCTD7	PREDICTED: Capra hircus potassium channel tetramerization domain containing 7 (KCTD7), mRNA	1.94629	0.904438	0.464699	-1.10563	2.32684e-09	3.03835e-07	down
102170026	NPFF	PREDICTED: Capra hircus neuropeptide FF-amide peptide precursor (NPFF), mRNA	1.23988	0.468016	0.37747	-1.40557	6.26349e-09	7.46138e-07	down
102176475	ARMC12	PREDICTED: Capra hircus armadillo repeat containing 12 (ARMC12), transcript variant X5, mRNA;PREDICTED: Capra hircus armadillo repeat containing 12 (ARMC12), transcript variant X1, mRNA;PREDICTED: Capra hircus armadillo repeat containing 12 (ARMC12), transcript variant X6, mRNA;PREDICTED: Capra hircus armadillo repeat containing 12 (ARMC12), transcript variant X4, mRNA;PREDICTED: Capra hircus arm…	1.53416	0.747476	0.48722	-1.03735	9.97711e-09	1.09822e-06	down
108633180	LOC108633180		4.32241	1.77635	0.410962	-1.28292	1.39551e-08	1.51112e-06	down
108636723	LOC108636723	PREDICTED: Capra hircus uncharacterized LOC108636723 (LOC108636723), transcript variant X1, ncRNA;PREDICTED: Capra hircus uncharacterized LOC108636723 (LOC108636723), transcript variant X2, ncRNA	0.76044	0.262199	0.344798	-1.53617	4.40985e-08	4.05067e-06	down
102182799	TTC31	PREDICTED: Capra hircus tetratricopeptide repeat domain 31 (TTC31), mRNA	1.4439	0.540546	0.374366	-1.41748	5.27116e-08	4.77596e-06	down
108634342	LOC108634342	PREDICTED: Capra hircus uncharacterized LOC108634342 (LOC108634342), mRNA	0.259425	0.0505373	0.194805	-2.3599	1.09697e-07	8.74885e-06	down
108633349	LOC108633349	PREDICTED: Capra hircus uncharacterized LOC108633349 (LOC108633349), ncRNA	0.389522	0.0831013	0.213342	-2.22876	1.1778e-07	9.2277e-06	down
100861219	SEPP1	Capra hircus selenoprotein P (SELENOP), mRNA	1.71648	0.587212	0.342102	-1.5475	1.53217e-07	1.15294e-05	down
106503697	LOC106503697		0.365823	0.0920873	0.251726	-1.99007	1.83356e-07	1.35673e-05	down
102170348	RHOF	PREDICTED: Capra hircus ras homolog family member F, filopodia associated (RHOF), transcript variant X1, mRNA;PREDICTED: Capra hircus ras homolog family member F, filopodia associated (RHOF), transcript variant X10, mRNA;PREDICTED: Capra hircus ras homolog family member F, filopodia associated (RHOF), transcript variant X3, mRNA;PREDICTED: Capra hircus ras homolog family member F, filopodia assoc…	1.12405	0.50095	0.445666	-1.16596	2.01687e-07	1.45204e-05	down
102181771	LOC102181771	PREDICTED: Capra hircus GTPase IMAP family member 7 (LOC102181771), transcript variant X2, mRNA;PREDICTED: Capra hircus GTPase IMAP family member 7 (LOC102181771), transcript variant X1, mRNA	1.00471	0.289367	0.288012	-1.7958	4.799e-07	3.00084e-05	down
108633772	LOC108633772	PREDICTED: Capra hircus translation initiation factor IF-2-like (LOC108633772), mRNA	0.941657	0.318704	0.33845	-1.56299	7.65102e-07	4.52906e-05	down
108638515	LOC108638515	PREDICTED: Capra hircus uncharacterized LOC108638515 (LOC108638515), ncRNA	1.94569	0.700854	0.360208	-1.4731	1.27383e-06	6.84116e-05	down
102175781	LOC102175781	PREDICTED: Capra hircus putative uncharacterized protein FLJ37770 (LOC102175781), mRNA	0.53878	0.240888	0.447099	-1.16133	1.45073e-06	7.57738e-05	down
102180503	GPR21	PREDICTED: Capra hircus G protein-coupled receptor 21 (GPR21), mRNA	0.369454	0.752067	2.03562	1.02547	1.54757e-06	7.95831e-05	up
102172004	ZBTB32	PREDICTED: Capra hircus zinc finger and BTB domain containing 32 (ZBTB32), transcript variant X1, mRNA;PREDICTED: Capra hircus zinc finger and BTB domain containing 32 (ZBTB32), transcript variant X2, mRNA;PREDICTED: Capra hircus zinc finger and BTB domain containing 32 (ZBTB32), transcript variant X3, mRNA;PREDICTED: Capra hircus zinc finger and BTB domain containing 32 (ZBTB32), transcript vari…	0.210175	0.0520823	0.247805	-2.01273	2.52857e-06	0.000120379	down
106502407	LOC106502407	PREDICTED: Capra hircus uncharacterized LOC106502407 (LOC106502407), ncRNA	0.456875	0.130948	0.286616	-1.80281	2.56714e-06	0.000121247	down
108635995	LOC108635995	PREDICTED: Capra hircus uncharacterized LOC108635995 (LOC108635995), transcript variant X1, ncRNA;PREDICTED: Capra hircus uncharacterized LOC108635995 (LOC108635995), transcript variant X2, ncRNA	0.26507	0.0638215	0.240772	-2.05426	3.15381e-06	0.000141433	down
106503449	LOC106503449	PREDICTED: Capra hircus uncharacterized LOC106503449 (LOC106503449), ncRNA	0.949377	0.342679	0.360951	-1.47012	4.62346e-06	0.000198645	down
108638282	LOC108638282	PREDICTED: Capra hircus uncharacterized LOC108638282 (LOC108638282), ncRNA	2.42546	1.06723	0.440014	-1.18438	5.23195e-06	0.000218446	down
102178635	LOC102178635	PREDICTED: Capra hircus uncharacterized LOC102178635 (LOC102178635), transcript variant X1, ncRNA;PREDICTED: Capra hircus uncharacterized LOC102178635 (LOC102178635), transcript variant X2, ncRNA	1.87747	0.721694	0.384397	-1.37933	6.41948e-06	0.00025676	down
102185818	F8	PREDICTED: Capra hircus coagulation factor VIII (F8), mRNA	0.0535293	0.160093	2.99075	1.58051	7.79435e-06	0.000301782	up
102174906	SFTPD	PREDICTED: Capra hircus surfactant protein D (SFTPD), transcript variant X1, mRNA;PREDICTED: Capra hircus surfactant protein D (SFTPD), transcript variant X2, mRNA;PREDICTED: Capra hircus surfactant protein D (SFTPD), transcript variant X3, mRNA	1.10468	0.446316	0.404023	-1.30749	7.96599e-06	0.000305761	down
102171875	KLF4	PREDICTED: Capra hircus Kruppel like factor 4 (KLF4), transcript variant X3, mRNA;PREDICTED: Capra hircus Kruppel like factor 4 (KLF4), transcript variant X2, mRNA;PREDICTED: Capra hircus Kruppel like factor 4 (KLF4), transcript variant X1, mRNA	5.00169	12.5898	2.5171	1.33176	8.82538e-06	0.000331113	up
102172910	EGFL7	PREDICTED: Capra hircus EGF like domain multiple 7 (EGFL7), transcript variant X2, mRNA;PREDICTED: Capra hircus EGF like domain multiple 7 (EGFL7), transcript variant X3, mRNA;PREDICTED: Capra hircus EGF like domain multiple 7 (EGFL7), transcript variant X7, mRNA;PREDICTED: Capra hircus EGF like domain multiple 7 (EGFL7), transcript variant X9, misc_RNA;PREDICTED: Capra hircus EGF like domain mul…	1.04085	0.428788	0.411959	-1.27943	1.08108e-05	0.000397758	down
102173195	LOC102173195	PREDICTED: Capra hircus cytochrome b-c1 complex subunit 7 pseudogene (LOC102173195), misc_RNA	0.142275	0.390658	2.7458	1.45723	1.13214e-05	0.000410872	up
108634746	LOC108634746	PREDICTED: Capra hircus translation initiation factor IF-2-like (LOC108634746), mRNA	1.35423	3.17842	2.34703	1.23084	1.31442e-05	0.000457096	up
102172817	UBXN2A	PREDICTED: Capra hircus UBX domain protein 2A (UBXN2A), transcript variant X1, mRNA;PREDICTED: Capra hircus UBX domain protein 2A (UBXN2A), transcript variant X2, mRNA	22.0022	6.77532	0.307938	-1.69929	1.47518e-05	0.000505089	down
108637540	LOC108637540	PREDICTED: Capra hircus sarcalumenin-like (LOC108637540), mRNA	0.409196	0.138792	0.339183	-1.55986	2.5769e-05	0.000798179	down
102186982	TMEM52	PREDICTED: Capra hircus transmembrane protein 52 (TMEM52), mRNA	2.63948	1.25766	0.476481	-1.06951	3.19111e-05	0.00093412	down
102176796	FAM166B	PREDICTED: Capra hircus family with sequence similarity 166 member B (FAM166B), transcript variant X1, mRNA;PREDICTED: Capra hircus family with sequence similarity 166 member B (FAM166B), transcript variant X2, mRNA	0.554306	0.222513	0.401425	-1.3168	3.99201e-05	0.00111701	down
100860801	LIPE	PREDICTED: Capra hircus lipase E, hormone sensitive type (LIPE), transcript variant X1, mRNA;PREDICTED: Capra hircus lipase E, hormone sensitive type (LIPE), transcript variant X2, mRNA;PREDICTED: Capra hircus lipase E, hormone sensitive type (LIPE), transcript variant X3, mRNA	1.01795	0.418147	0.410774	-1.28358	4.97865e-05	0.00133154	down
102184316	ZNF641	PREDICTED: Capra hircus zinc finger protein 641 (ZNF641), mRNA	0.182278	0.462471	2.53717	1.34322	5.08351e-05	0.00135415	up
102186826	KCNIP2	PREDICTED: Capra hircus potassium voltage-gated channel interacting protein 2 (KCNIP2), transcript variant X3, mRNA;PREDICTED: Capra hircus potassium voltage-gated channel interacting protein 2 (KCNIP2), transcript variant X4, mRNA;PREDICTED: Capra hircus potassium voltage-gated channel interacting protein 2 (KCNIP2), transcript variant X1, mRNA;PREDICTED: Capra hircus potassium voltage-gated cha…	0.393003	0.132961	0.338322	-1.56353	5.95803e-05	0.00153948	down
102173656	SAP25	PREDICTED: Capra hircus Sin3A associated protein 25 (SAP25), mRNA	1.96737	0.948161	0.481943	-1.05306	6.04083e-05	0.001552	down
102174972	CARD14	PREDICTED: Capra hircus caspase recruitment domain family member 14 (CARD14), transcript variant X1, mRNA;PREDICTED: Capra hircus caspase recruitment domain family member 14 (CARD14), transcript variant X3, mRNA;PREDICTED: Capra hircus caspase recruitment domain family member 14 (CARD14), transcript variant X4, mRNA;PREDICTED: Capra hircus caspase recruitment domain family member 14 (CARD14), tra…	0.380877	0.147882	0.388266	-1.36488	6.14673e-05	0.00156836	down
102172118	LOC102172118		0.812443	0.298645	0.367589	-1.44383	7.66824e-05	0.00185024	down
108633857	LOC108633857	PREDICTED: Capra hircus collagen alpha-2(I) chain-like (LOC108633857), mRNA	1.1655	0.541623	0.464715	-1.10558	8.97136e-05	0.00207495	down
106503097	IRX3	PREDICTED: Capra hircus iroquois homeobox 3 (IRX3), transcript variant X2, mRNA;PREDICTED: Capra hircus iroquois homeobox 3 (IRX3), transcript variant X1, mRNA;PREDICTED: Capra hircus iroquois homeobox 3 (IRX3), transcript variant X3, misc_RNA	1.50031	3.90308	2.60151	1.37935	9.8757e-05	0.0022294	up
108633289	SLC25A53	PREDICTED: Capra hircus solute carrier family 25 member 53 (SLC25A53), transcript variant X1, mRNA;PREDICTED: Capra hircus solute carrier family 25 member 53 (SLC25A53), transcript variant X2, mRNA	0.438925	0.183201	0.417386	-1.26055	0.000100776	0.00226346	down
102173284	NOXA1	PREDICTED: Capra hircus NADPH oxidase activator 1 (NOXA1), transcript variant X1, mRNA;PREDICTED: Capra hircus NADPH oxidase activator 1 (NOXA1), transcript variant X5, mRNA;PREDICTED: Capra hircus NADPH oxidase activator 1 (NOXA1), transcript variant X4, mRNA;PREDICTED: Capra hircus NADPH oxidase activator 1 (NOXA1), transcript variant X8, mRNA;PREDICTED: Capra hircus NADPH oxidase activator 1 (…	1.27166	0.569398	0.44776	-1.1592	0.000105792	0.0023406	down
102189598	SAMD10	PREDICTED: Capra hircus sterile alpha motif domain containing 10 (SAMD10), transcript variant X1, mRNA;PREDICTED: Capra hircus sterile alpha motif domain containing 10 (SAMD10), transcript variant X2, mRNA	1.10838	0.526871	0.475351	-1.07294	0.00012016	0.00252829	down
102169001	PLAC8L1	PREDICTED: Capra hircus PLAC8 like 1 (PLAC8L1), mRNA	0.463879	1.09977	2.37081	1.24538	0.000127811	0.00267239	up
102190854	LOC102190854	PREDICTED: Capra hircus uncharacterized LOC102190854 (LOC102190854), transcript variant X1, ncRNA;PREDICTED: Capra hircus uncharacterized LOC102190854 (LOC102190854), transcript variant X2, ncRNA	0.597477	0.272692	0.456406	-1.13161	0.000132621	0.00275068	down
102174396	SCAMP1	PREDICTED: Capra hircus secretory carrier membrane protein 1 (SCAMP1), transcript variant X3, mRNA;PREDICTED: Capra hircus secretory carrier membrane protein 1 (SCAMP1), transcript variant X4, mRNA;PREDICTED: Capra hircus secretory carrier membrane protein 1 (SCAMP1), transcript variant X2, mRNA;PREDICTED: Capra hircus secretory carrier membrane protein 1 (SCAMP1), transcript variant X1, mRNA	3.43087	7.03512	2.05054	1.036	0.000139368	0.00283829	up
108637588	LOC108637588		0.853903	0.342013	0.400529	-1.32002	0.000156982	0.00312532	down
102189625	LOC102189625	PREDICTED: Capra hircus uncharacterized LOC102189625 (LOC102189625), ncRNA	0.735322	0.323868	0.440444	-1.18297	0.000166537	0.00327155	down
108637305	LOC108637305	PREDICTED: Capra hircus uncharacterized LOC108637305 (LOC108637305), transcript variant X1, ncRNA;PREDICTED: Capra hircus uncharacterized LOC108637305 (LOC108637305), transcript variant X2, ncRNA	0.408709	0.955006	2.33664	1.22444	0.000181568	0.00350637	up
102181714	C18H19orf18	PREDICTED: Capra hircus chromosome 18 C19orf18 homolog (C18H19orf18), mRNA	0.5491	0.257929	0.469731	-1.09009	0.000267191	0.00475128	down
102189677	SHC3	PREDICTED: Capra hircus SHC adaptor protein 3 (SHC3), transcript variant X1, mRNA;PREDICTED: Capra hircus SHC adaptor protein 3 (SHC3), transcript variant X2, mRNA	0.169392	0.0683943	0.403764	-1.30841	0.000305851	0.00527672	down
106502172	LOC106502172	PREDICTED: Capra hircus uncharacterized LOC106502172 (LOC106502172), ncRNA	0.458991	0.198309	0.432055	-1.21071	0.000322901	0.00551958	down
102186613	LOC102186613	PREDICTED: Capra hircus uncharacterized LOC102186613 (LOC102186613), transcript variant X1, ncRNA;PREDICTED: Capra hircus uncharacterized LOC102186613 (LOC102186613), transcript variant X2, ncRNA	0.323209	0.135911	0.420505	-1.24981	0.00034565	0.00578652	down
108638507	LOC108638507	PREDICTED: Capra hircus interferon alpha-inducible protein 27-like protein 2A (LOC108638507), mRNA	1.40381	0.485612	0.345925	-1.53147	0.000369555	0.00613728	down
108637987	LOC108637987	PREDICTED: Capra hircus uncharacterized LOC108637987 (LOC108637987), ncRNA	0.475167	0.17479	0.36785	-1.44281	0.00043836	0.00691768	down
102185574	FBXO41	PREDICTED: Capra hircus F-box protein 41 (FBXO41), mRNA	0.199989	0.088718	0.443615	-1.17262	0.000454987	0.00711264	down
100860876	RORC	PREDICTED: Capra hircus RAR related orphan receptor C (RORC), transcript variant X11, mRNA;PREDICTED: Capra hircus RAR related orphan receptor C (RORC), transcript variant X5, mRNA;PREDICTED: Capra hircus RAR related orphan receptor C (RORC), transcript variant X10, mRNA;PREDICTED: Capra hircus RAR related orphan receptor C (RORC), transcript variant X8, mRNA;PREDICTED: Capra hircus RAR related o…	0.317062	0.139724	0.440684	-1.18218	0.000468783	0.00728556	down
102183468	XKR8	PREDICTED: Capra hircus XK related 8 (XKR8), mRNA	0.959074	0.474818	0.495079	-1.01427	0.000502868	0.00768966	down
102186423	JPH3	PREDICTED: Capra hircus junctophilin 3 (JPH3), mRNA	0.22726	0.070615	0.310723	-1.6863	0.000686865	0.00973061	down
108637994	SRRM5	PREDICTED: Capra hircus serine/arginine repetitive matrix 5 (SRRM5), mRNA	0.349679	0.160458	0.458871	-1.12384	0.000955221	0.0124322	down
106502341	LOC106502341		0.413679	1.10859	2.67982	1.42214	0.00103222	0.0131436	up
102176404	TUBA8	PREDICTED: Capra hircus tubulin alpha 8 (TUBA8), mRNA	0.757622	0.320884	0.423542	-1.23942	0.00106093	0.0134193	down
106503930	LOC106503930	PREDICTED: Capra hircus interferon alpha-inducible protein 27, mitochondrial (LOC106503930), transcript variant X1, mRNA;PREDICTED: Capra hircus interferon alpha-inducible protein 27, mitochondrial (LOC106503930), transcript variant X2, mRNA;PREDICTED: Capra hircus interferon alpha-inducible protein 27, mitochondrial (LOC106503930), transcript variant X3, mRNA;PREDICTED: Capra hircus interferon a…	1.5386	0.633524	0.411754	-1.28014	0.00117812	0.014556	down
102169699	LOC102169699	PREDICTED: Capra hircus uncharacterized LOC102169699 (LOC102169699), transcript variant X8, ncRNA;PREDICTED: Capra hircus uncharacterized LOC102169699 (LOC102169699), transcript variant X2, ncRNA;PREDICTED: Capra hircus uncharacterized LOC102169699 (LOC102169699), transcript variant X4, ncRNA;PREDICTED: Capra hircus uncharacterized LOC102169699 (LOC102169699), transcript variant X7, ncRNA;PREDICT…	0.794673	0.350206	0.440692	-1.18216	0.00118517	0.014616	down
102173557	LOC102173557	PREDICTED: Capra hircus uncharacterized LOC102173557 (LOC102173557), transcript variant X2, ncRNA;PREDICTED: Capra hircus uncharacterized LOC102173557 (LOC102173557), transcript variant X3, ncRNA;PREDICTED: Capra hircus uncharacterized LOC102173557 (LOC102173557), transcript variant X1, ncRNA	0.621251	0.263731	0.424516	-1.23611	0.00131779	0.015798	down
102182798	TSGA10	PREDICTED: Capra hircus testis specific 10 (TSGA10), mRNA	0.646129	0.299071	0.462866	-1.11133	0.00156277	0.0178793	down
102171644	SLC8A2	PREDICTED: Capra hircus solute carrier family 8 member A2 (SLC8A2), transcript variant X1, misc_RNA;PREDICTED: Capra hircus solute carrier family 8 member A2 (SLC8A2), transcript variant X2, mRNA;PREDICTED: Capra hircus solute carrier family 8 member A2 (SLC8A2), transcript variant X3, misc_RNA	0.194354	0.0951149	0.48939	-1.03094	0.00174248	0.0193886	down
108634664	LOC108634664		0.290674	0.130271	0.448168	-1.15789	0.00184415	0.020166	down
102168593	LOC102168593	PREDICTED: Capra hircus uncharacterized LOC102168593 (LOC102168593), transcript variant X2, ncRNA;PREDICTED: Capra hircus uncharacterized LOC102168593 (LOC102168593), transcript variant X3, ncRNA;PREDICTED: Capra hircus uncharacterized LOC102168593 (LOC102168593), transcript variant X1, ncRNA	0.420614	0.200489	0.476658	-1.06897	0.00208917	0.0221014	down
102190234	WDR72	PREDICTED: Capra hircus WD repeat domain 72 (WDR72), mRNA	0.338063	0.153931	0.455331	-1.13501	0.0022679	0.0234157	down
108634775	LOC108634775	PREDICTED: Capra hircus basic proline-rich protein-like (LOC108634775), partial mRNA	2.49961	12.2257	4.89106	2.29015	0.00244885	0.0246346	up
102172816	LOC102172816		1.33046	0.650224	0.488723	-1.03291	0.00255479	0.0253456	down
102184100	TNFAIP6	PREDICTED: Capra hircus TNF alpha induced protein 6 (TNFAIP6), mRNA	0.730175	0.325514	0.445803	-1.16552	0.00271177	0.0264214	down
102188416	LOC102188416	PREDICTED: Capra hircus uncharacterized LOC102188416 (LOC102188416), transcript variant X3, ncRNA;PREDICTED: Capra hircus uncharacterized LOC102188416 (LOC102188416), transcript variant X1, ncRNA;PREDICTED: Capra hircus uncharacterized LOC102188416 (LOC102188416), transcript variant X2, ncRNA	0.265897	0.114523	0.430703	-1.21523	0.00299287	0.0283513	down
102180951	LAPTM4B	PREDICTED: Capra hircus lysosomal protein transmembrane 4 beta (LAPTM4B), mRNA	0.830248	0.410865	0.49487	-1.01488	0.00324134	0.0301898	down
102183734	GCG	PREDICTED: Capra hircus glucagon (GCG), transcript variant X1, mRNA;PREDICTED: Capra hircus glucagon (GCG), transcript variant X2, mRNA	1.43299	0.645847	0.4507	-1.14976	0.00365162	0.0323192	down
102171966	LOC102171966		0.850235	1.73555	2.04126	1.02946	0.00416541	0.0350468	up
102180880	LOC102180880	PREDICTED: Capra hircus C-C motif chemokine 4 (LOC102180880), mRNA	0.863203	1.90694	2.20915	1.14349	0.00437159	0.0363453	up
102185139	PHKG1	PREDICTED: Capra hircus phosphorylase kinase catalytic subunit gamma 1 (PHKG1), mRNA	0.423255	0.205423	0.485341	-1.04293	0.00450999	0.0371756	down
102173827	LOC102173827	PREDICTED: Capra hircus sex comb on midleg-like protein 1 (LOC102173827), mRNA	0.690028	0.339822	0.492476	-1.02187	0.00465381	0.0379805	down
102188889	HPN	PREDICTED: Capra hircus hepsin (HPN), transcript variant X2, mRNA;PREDICTED: Capra hircus hepsin (HPN), transcript variant X1, mRNA	0.571487	0.230564	0.403446	-1.30955	0.00580571	0.0444659	down
108635842	LOC108635842	PREDICTED: Capra hircus uncharacterized LOC108635842 (LOC108635842), transcript variant X2, ncRNA;PREDICTED: Capra hircus uncharacterized LOC108635842 (LOC108635842), transcript variant X1, ncRNA	1.05367	0.504184	0.478504	-1.0634	0.0066319	0.0483472	down
108638020	LOC108638020	PREDICTED: Capra hircus uncharacterized LOC108638020 (LOC108638020), ncRNA	0.782982	0.38963	0.497623	-1.00688	0.00948257	0.0621241	down
106502944	LOC106502944	PREDICTED: Capra hircus uncharacterized LOC106502944 (LOC106502944), ncRNA	0.472923	0.223306	0.472183	-1.08258	0.0100121	0.0644829	down
108635459	LOC108635459	PREDICTED: Capra hircus NKG2D ligand 3-like (LOC108635459), transcript variant X1, mRNA;PREDICTED: Capra hircus NKG2D ligand 3-like (LOC108635459), transcript variant X2, mRNA	1.12211	0.271501	0.241956	-2.04719	0.0231927	0.11211	down
108634770	LOC108634770	PREDICTED: Capra hircus basic proline-rich protein-like (LOC108634770), mRNA	0.258953	0.861605	3.32726	1.73433	0.0398145	0.159007	up
102185444	MBNL3	PREDICTED: Capra hircus muscleblind like splicing regulator 3 (MBNL3), transcript variant X3, mRNA;PREDICTED: Capra hircus muscleblind like splicing regulator 3 (MBNL3), transcript variant X1, mRNA;PREDICTED: Capra hircus muscleblind like splicing regulator 3 (MBNL3), transcript variant X4, mRNA;PREDICTED: Capra hircus muscleblind like splicing regulator 3 (MBNL3), transcript variant X2, mRNA;PRE…	1.90098	0.920741	0.484352	-1.04587	0.0422739	0.165262	down
108638198	LOC108638198	PREDICTED: Capra hircus uncharacterized LOC108638198 (LOC108638198), transcript variant X2, ncRNA;PREDICTED: Capra hircus uncharacterized LOC108638198 (LOC108638198), transcript variant X1, ncRNA	0.178636	0.446014	2.49678	1.32007	0.0433672	0.16803	up
