# Supplementary material for: The mRNA and miRNA profiles of goat bronchial epithelial cells stimulated by Pasteurella multocida strains of serotype A and D
Source: PeerJ. 2022 Mar 18;10:e13047. doi: 10.7717/peerj.13047 (PMC8935994; doi:10.7717/peerj.13047)
Supplement: Table S3 [file peerj-10-13047-s003.xlsx]

## Sheet: Ctrl vs A_T4h
Total differentially expressed miRNAs in the P. multocida strain serotype A- stimulated group
miRNA_name	regulation	fold_change(A_T4h(mean)/Ctrl(mean))	log2(fold_change)	p-value	Ctrl(mean)	A_T4h(mean)	Expression level
hsa-miR-4508_L+2	down	0.248208	-2.01038	0.000145413	132.514	32.891	middle
chi-miR-26b-5p	up	1.64466	0.717793	0.000223337	3914.78	6438.5	middle
PC-3p-26655_277	up	inf	inf	0.000265894	0	15.1399	middle
cgr-miR-16-3p	up	3.06579	1.61626	0.000330697	21.471	65.8254	middle
chi-miR-340-5p	up	1.49515	0.58029	0.000362097	609.885	911.869	middle
chi-miR-2318	up	1.72484	0.786465	0.000454788	96.5877	166.599	middle
PC-3p-8606_1081	up	15.5331	3.95727	0.000495987	5.01624	77.9176	middle
chi-miR-1307-3p	down	0.758142	-0.399461	0.000534798	2986.69	2264.34	middle
bta-miR-7857-3p	down	0.766861	-0.382963	0.000625631	44021.6	33758.4	high
chi-let-7g-5p	up	1.59692	0.675297	0.000752509	69521.5	111021	high
mmu-mir-6240-p5_1ss15TG_1	down	0.496027	-1.01151	0.000795654	1339.78	664.565	middle
mmu-mir-6240-p5_1ss15TG_2	down	0.496027	-1.01151	0.000795654	1339.78	664.565	middle
bta-miR-6119-5p	up	1.8096	0.855673	0.00102477	740.963	1340.85	middle
chi-miR-21-5p	up	1.80432	0.851456	0.0010632	281898	508635	high
chi-miR-146a	up	1.40244	0.487939	0.00109331	3840.16	5385.6	middle
bta-miR-152_R-1	up	1.50859	0.593196	0.00119611	4653.39	7020.03	middle
mmu-miR-6240_L-1R-5_1ss21AG	down	0.534104	-0.904808	0.00121143	1095.3	585.004	middle
bta-mir-2285cq-p3_1ss11TC	up	1.89258	0.920353	0.00122606	112.419	212.762	middle
PC-5p-110911_23	up	inf	inf	0.0013077	0	5.31811	low
chi-miR-21-3p	up	1.84605	0.88444	0.00135747	65.0541	120.093	middle
chi-miR-296-3p	down	0.614988	-0.701371	0.00144496	5070.64	3118.38	middle
chi-miR-423-5p	down	0.72982	-0.454387	0.00150662	25830.9	18851.9	high
chi-miR-146b-5p	up	1.49284	0.57806	0.00154698	663.253	990.132	middle
mmu-miR-92a-3p_R+2	down	0.631011	-0.664264	0.00166891	549.809	346.935	middle
ssc-mir-4332-p3_1ss8TC	down	0.166383	-2.58742	0.00175285	8.38677	1.39542	low
chi-miR-9-5p	up	1.54039	0.623298	0.00182841	9468.89	14585.8	high
bta-miR-452_L+3R-1	up	1.49196	0.577206	0.00190931	3919.08	5847.1	middle
mmu-mir-6240-p3_1	down	0.347851	-1.52346	0.00191152	736.134	256.065	middle
mmu-mir-6240-p3_2	down	0.347851	-1.52346	0.00191152	736.134	256.065	middle
chi-miR-455-3p	down	0.709692	-0.494736	0.001916	7268.36	5158.29	middle
chi-miR-100-3p_R+1	up	6.09919	2.60862	0.00202183	5.60776	34.2028	middle
chi-miR-361-5p	down	0.766872	-0.382943	0.00204164	5960.56	4570.99	middle
chi-miR-331-3p_L+1R-1	down	0.700189	-0.514183	0.00227569	4901.64	3432.08	middle
ssc-mir-1285-p5	down	0.176877	-2.49918	0.00227792	9795.84	1732.66	high
bta-miR-11987_L-2R-1_1ss8TA	down	0.260959	-1.93811	0.0023367	825.852	215.513	middle
bta-miR-2285bu_L+1R-1_1ss5AG	up	inf	inf	0.00236135	0	2.82881	low
PC-3p-63099_79	up	inf	inf	0.00238818	0	6.55532	middle
cja-miR-203	up	1.26666	0.341031	0.0024126	23434.3	29683.4	high
mmu-mir-6240-p3_1ss24GT	down	0.362713	-1.4631	0.00246101	1858.09	673.954	middle
bta-miR-2285f	up	1.86094	0.896031	0.00260404	23.756	44.2085	middle
chi-miR-193b-3p	down	0.647099	-0.627941	0.0026152	19381.7	12541.9	high
oan-miR-1386_L+1_1	down	0.197486	-2.34018	0.00273285	23.7396	4.68825	middle
oan-miR-1386_L+1_2	down	0.197486	-2.34018	0.00273285	23.7396	4.68825	middle
mml-miR-452-3p_L+2R-2	up	1.66446	0.735056	0.00277229	269.582	448.708	middle
PC-3p-23853_317	up	inf	inf	0.00281275	0	21.7784	middle
bta-mir-2285bz-p3_1ss19TC	up	2.34032	1.22671	0.00290725	6.05803	14.1778	middle
chi-let-7i-5p	up	1.52835	0.611971	0.00290933	28392.6	43393.7	high
bta-miR-652_R+1	down	0.732552	-0.448997	0.00292476	6330.46	4637.39	middle
mmu-mir-6240-p3_1ss25GT	down	0.451303	-1.14783	0.00293482	1996.39	900.977	middle
mml-miR-574	down	0.64997	-0.621554	0.0029552	4991.57	3244.37	middle
chi-let-7f-5p	up	1.81216	0.857709	0.00299895	48563.8	88005.2	high
chi-miR-20a-3p_R+2	up	2.03719	1.02658	0.0031128	23.1136	47.0868	middle
bta-miR-1839_R-2	up	1.46201	0.547957	0.00325176	351.089	513.298	middle
mmr-miR-1839_L+1R-1	up	1.46201	0.547957	0.00325176	351.089	513.298	middle
chi-miR-450-5p_R+2	up	1.71628	0.779284	0.0032775	466.399	800.471	middle
bta-mir-7857-1-p3_1ss1TC	down	0.743398	-0.427793	0.00338718	7832.81	5822.89	middle
chi-miR-200a_R+2	up	1.44058	0.526646	0.00347571	25597.8	36875.6	high
bta-miR-11987_L-2_1ss8TA	down	0.303905	-1.71831	0.00373381	1154.11	350.741	middle
chi-miR-9-3p_R+2	up	1.79317	0.842516	0.00441491	503.107	902.158	middle
chi-miR-877-5p_R+3	down	0.677145	-0.562464	0.00446274	2070.84	1402.26	middle
chi-miR-20a-5p	up	1.83269	0.873961	0.00455899	15846	29040.8	high
ssc-mir-1285-p3_1ss15CT	down	0.60388	-0.727665	0.00456361	6857.09	4140.86	high
chi-let-7e-3p_1ss22CT	down	0.63675	-0.6512	0.0045822	346.034	220.337	middle
bta-miR-2387_R+1	down	0.668299	-0.581434	0.0046034	2253.44	1505.97	middle
cgr-miR-125b_R+1	up	1.69873	0.764453	0.00477756	1678.41	2851.15	middle
bta-miR-503-5p_R+3	up	8.56052	3.0977	0.00480218	3.34416	28.6277	middle
PC-3p-7303_1297	up	7.91356	2.98433	0.00509321	8.5637	67.7693	middle
bta-miR-11987_L-1R-2_1ss8TA	down	0.11154	-3.16436	0.00522695	50.4177	5.62361	middle
chi-let-7f-3p_1ss22CT	up	1.33683	0.41882	0.00567451	149.975	200.491	middle
chi-miR-204-5p	down	0.792535	-0.335453	0.00595197	1014.74	804.216	middle
bta-mir-2887-1-p3_1ss9TC	down	0.487482	-1.03658	0.00621702	979.864	477.666	middle
chi-miR-7-5p	up	2.26997	1.18267	0.00627238	3996.38	9071.65	high
bta-mir-2284z-2-p5_1ss1AG	up	1.82406	0.867156	0.00633845	10.296	18.7805	middle
bta-mir-2284z-4-p5_1ss1AG	up	1.82406	0.867156	0.00633845	10.296	18.7805	middle
bta-mir-2285cx-p5_1ss1AG	up	1.82406	0.867156	0.00633845	10.296	18.7805	middle
bta-mir-2285ce-p5_1ss1AG	up	1.82406	0.867156	0.00633845	10.296	18.7805	middle
bta-miR-2285bb_1ss12GT	up	1.82406	0.867156	0.00633845	10.296	18.7805	middle
mml-miR-222-5p_L+2	up	2.56004	1.35616	0.00695979	266.427	682.062	middle
mml-miR-569_L-3_1ss20GC	up	inf	inf	0.00700198	0	7.04545	middle
PC-5p-88035_40	up	inf	inf	0.00700198	0	7.04545	low
PC-3p-5764_1694	up	1.82633	0.86895	0.00710914	88.7988	162.176	middle
chi-miR-504_R+1	down	0.722085	-0.469759	0.00713033	281.674	203.393	middle
chi-miR-196a_R+1	up	1.37248	0.456782	0.00721539	187.598	257.474	middle
bta-miR-4286_R+3	down	0.425475	-1.23285	0.00765146	16.4007	6.97809	middle
chi-miR-365-3p	down	0.715417	-0.483144	0.00794981	45311.8	32416.8	high
chi-miR-148a-3p	up	1.60123	0.679178	0.0079696	3174.71	5083.43	middle
chi-miR-1307-5p_R+4	up	1.53353	0.61686	0.00819535	79.5209	121.948	middle
ssc-miR-7134-3p	down	0.75885	-0.398114	0.00821208	600.901	455.994	middle
chi-miR-129-5p	down	0.779659	-0.359085	0.00833749	5891.46	4593.33	middle
chi-miR-27b-5p_R+1	up	1.5049	0.589672	0.00840413	2679.71	4032.7	middle
PC-3p-19071_416	up	inf	inf	0.00864743	0	40.6974	middle
hsa-miR-10400-5p_R-3_1ss12GA	down	0.102675	-3.28384	0.00866334	33.0294	3.39131	middle
bta-mir-2904-2-p3	down	0.498702	-1.00375	0.00881865	617.074	307.736	middle
bta-mir-2887-1-p5	down	0.480975	-1.05597	0.00897555	1451.99	698.37	middle
bta-mir-2285cj-p5_1ss8CG	up	2.06032	1.04287	0.00899826	1.30038	2.6792	low
PC-3p-9575_947	up	1.56062	0.642122	0.00939907	24.7528	38.6297	middle
chi-miR-429_R+1	up	1.44757	0.533636	0.00955382	2123.2	3073.48	middle
chi-miR-15b-3p	up	1.63049	0.705305	0.00958521	1438.56	2345.57	middle
hsa-miR-4508_L+1	down	0.31459	-1.66846	0.00962464	52.5271	16.5245	middle
chi-miR-30d-3p_L+1	up	1.78136	0.832976	0.00967845	51.9983	92.6274	middle
PC-5p-19612_402	down	0.363455	-1.46015	0.0098725	63.986	23.256	middle
chi-miR-26a-3p	up	1.71684	0.779754	0.00988191	44.579	76.5349	middle
bta-miR-205	down	0.70792	-0.498342	0.00991439	995202	704523	high
chi-miR-98-5p	up	1.91181	0.93494	0.0103033	690.219	1319.57	middle
bta-mir-2904-2-p5_1ss8TC	down	0.533393	-0.906729	0.0103745	4157.75	2217.72	middle
PC-5p-18082_443	up	4.38653	2.13308	0.0104548	9.79353	42.9596	middle
bta-miR-125b_R+1	down	0.820257	-0.285851	0.010584	2347.49	1925.55	middle
bta-miR-2284y_L+1R-1	up	1.35186	0.434946	0.0107798	258.589	349.577	middle
chi-miR-101-3p_R+2	up	1.651	0.723336	0.0109854	869.5	1435.54	middle
PC-3p-41787_154	down	0.244306	-2.03324	0.0113098	7.91932	1.93474	low
chi-miR-147-5p_R+2	up	1.42231	0.508234	0.011403	145.427	206.842	middle
PC-3p-72995_60	up	inf	inf	0.0114036	0	6.01235	middle
oan-let-7b-5p_L+2	down	0.743333	-0.42792	0.0114447	111.142	82.6159	middle
chi-miR-3432-3p	down	0.799183	-0.323402	0.0115984	582.733	465.71	middle
bta-miR-2285cm_L+1R-2_1ss11AG	up	1.6538	0.725783	0.0118641	61.3371	101.439	middle
mmu-miR-5126_L-3_1ss18CT	down	0.101049	-3.30687	0.0119605	170.726	17.2517	middle
bta-miR-2285bz	up	inf	inf	0.012129	0	2.53091	low
chi-miR-106b-5p	up	1.49849	0.583509	0.0121637	1262.74	1892.21	middle
PC-5p-6660_1442	up	2.14109	1.09834	0.0122933	53.3174	114.157	middle
PC-3p-63687_78	up	inf	inf	0.0124511	0	2.81	low
PC-3p-53833_104	up	inf	inf	0.0126355	0	7.8903	middle
bta-mir-2399-p5_1ss3TA	up	inf	inf	0.01268	0	31.3346	middle
PC-5p-29464_244	up	3.94833	1.98124	0.0130031	4.72688	18.6633	middle
mml-miR-210-5p_1ss5CA	down	0.4379	-1.19133	0.0130469	420.585	184.174	middle
chi-miR-96	up	1.37896	0.46358	0.0130825	437.049	602.673	middle
chi-let-7b-5p	down	0.736102	-0.442022	0.0132253	80599.5	59329.5	high
bta-miR-760-3p_R+2	down	0.637678	-0.649101	0.0133339	1245.4	794.164	middle
chi-miR-328-3p	down	0.729999	-0.454034	0.0135195	625.015	456.26	middle
bta-let-7f_R+1	up	1.60234	0.680181	0.0136316	500.12	801.363	middle
chi-let-7a-3p_1ss22CT	up	1.45977	0.54574	0.0138943	2083.45	3041.36	middle
bta-miR-450b_R+1_1ss9TC	up	1.84654	0.884821	0.0141006	118.399	218.628	middle
bta-miR-185	up	1.45441	0.540437	0.0141603	3889.33	5656.69	middle
bta-miR-339b	down	0.784202	-0.350702	0.0142859	11486.5	9007.71	high
mmu-miR-205-3p	up	1.34759	0.430384	0.0146663	5240.37	7061.88	middle
PC-3p-2741_3833	down	0.710924	-0.492234	0.0147247	402.324	286.022	middle
PC-3p-23580_322	up	3.9152	1.96909	0.014849	5.21954	20.4355	middle
chi-miR-582-5p_L+1	up	1.19897	0.261799	0.0149353	216.576	259.669	middle
bta-mir-2285e-2-p5	up	2.91757	1.54477	0.0151704	17.76	51.816	middle
chi-miR-92a-5p	up	1.382	0.466753	0.0152057	569.459	786.99	middle
PC-3p-86338_42	up	inf	inf	0.0153539	0	5.86107	low
chi-miR-107-3p_R+1	up	1.10005	0.13757	0.0154525	3585.14	3943.83	middle
chi-miR-192-5p	up	1.55945	0.641039	0.0155193	1366.11	2130.38	middle
PC-5p-41504_155	down	0.315548	-1.66407	0.0159072	48.8378	15.4107	middle
mmu-let-7j_1ss8TG	up	1.40663	0.492239	0.0160896	57.3978	80.7373	middle
chi-miR-660	up	1.18884	0.249553	0.0163274	2473.35	2940.42	middle
mml-miR-34a-3p_L+1R-1	up	4.1854	2.06536	0.0163398	10.2358	42.8408	middle
chi-miR-3431-3p	down	0.854187	-0.227376	0.0163905	1096.7	936.789	middle
chi-miR-191-5p_R+1	down	0.841437	-0.249073	0.0166175	104826	88204.7	high
chi-miR-27a-5p	up	1.21537	0.281393	0.0172286	6642.2	8072.72	high
bta-miR-194b	up	inf	inf	0.0173885	0	2.41399	low
chi-miR-1388-3p	up	1.38333	0.468146	0.0174021	54.0134	74.7184	middle
chi-miR-30f-5p_R+1	down	0.534878	-0.902719	0.0174221	189.887	101.567	middle
chi-miR-92b	down	0.731134	-0.451791	0.0174758	83059.2	60727.4	high
oan-miR-92b_2ss16AG22TA	down	0.71256	-0.488916	0.017805	712.269	507.535	middle
chi-miR-125b-5p_R+2	down	0.789529	-0.340936	0.0180216	289412	228499	high
chi-miR-1249	down	0.718004	-0.477936	0.0188035	959.717	689.08	middle
PC-5p-68569_68	up	inf	inf	0.0192288	0	6.41924	low
mml-miR-92b-5p	down	0.704776	-0.504763	0.0192824	471.286	332.151	middle
chi-miR-197-3p	down	0.715354	-0.483271	0.0194966	7023.07	5023.98	middle
cgr-miR-3535_1ss20CT	up	1.71108	0.774911	0.01972	109.93	188.1	middle
bta-miR-664b_R+1	down	0.753492	-0.408337	0.0198668	401.371	302.43	middle
ptr-miR-877_R+4	down	0.476896	-1.06825	0.0199758	31.7467	15.1399	middle
bta-miR-1949_1ss19TC	down	0.719971	-0.473989	0.020314	122.306	88.057	middle
chi-miR-499-5p	up	1.93935	0.95557	0.0203781	123.257	239.037	middle
PC-3p-40995_158	up	inf	inf	0.0213495	0	7.86057	middle
bta-mir-2284z-2-p3_1ss22GT	up	1.3746	0.459008	0.0216616	143.471	197.214	middle
bta-miR-6535	down	0.287201	-1.79987	0.0220125	10.9019	3.13104	middle
chi-miR-200c	down	0.829619	-0.269479	0.0220683	180999	150160	high
PC-5p-48517_123	down	-inf	-inf	0.0222052	13.9322	0	middle
chi-miR-30e-3p_R+1	up	1.24261	0.313374	0.0224928	1001.44	1244.39	middle
bta-miR-6119-3p_L-1R-1	up	1.78444	0.835468	0.0225374	203.615	363.339	middle
oan-miR-205-5p_R+3_2	down	0.701463	-0.511562	0.0229319	3294.65	2311.07	middle
oan-miR-205-5p_R+3_1	down	0.701463	-0.511562	0.0229319	3294.65	2311.07	middle
chi-let-7g-3p_1ss22CT	up	1.30153	0.380212	0.0229635	38.0553	49.5302	middle
bta-miR-181b_R+2	down	0.443605	-1.17265	0.0232667	23.417	10.3879	middle
bta-mir-2284aa-3-p3_1	up	1.52238	0.606333	0.0234314	81.5686	124.179	middle
bta-mir-2284aa-3-p3_2	up	1.52238	0.606333	0.0234314	81.5686	124.179	middle
hsa-miR-1260a_R+2_1ss9TG	down	0.595796	-0.747109	0.0235746	67.2277	40.054	middle
bta-miR-194b-3p_L+1R-2	up	1.85092	0.888246	0.0241411	29.8451	55.2411	middle
chi-miR-449a-5p_R+1	up	1.57969	0.659639	0.0242074	184.104	290.826	middle
chi-miR-374b-3p	up	5.58888	2.48256	0.0242279	2.95594	16.5204	middle
ssc-mir-4332-p5_1ss1TC	down	0.137453	-2.86299	0.0244137	207.288	28.4923	middle
PC-3p-7572_1247	down	0.586421	-0.769991	0.0249681	173.887	101.971	middle
chi-miR-106b-3p_L+2	down	0.781927	-0.354894	0.0251615	10162.1	7946.04	high
chi-miR-26b-3p	down	0.743414	-0.427763	0.0252694	86.5856	64.3689	middle
PC-5p-35405_193	up	inf	inf	0.0254751	0	5.57439	middle
PC-5p-98642_30	up	inf	inf	0.0254751	0	5.57439	low
chi-miR-30e-5p	up	1.40832	0.493979	0.0255245	40048.6	56401.4	high
chi-miR-455-5p	up	1.57818	0.65826	0.0255608	677.323	1068.94	middle
PC-5p-22117_349	up	5.57192	2.47818	0.0256079	2.2636	12.6126	middle
PC-5p-3344_3101	down	0.684953	-0.545923	0.0256505	492.875	337.596	middle
bta-miR-2285bd_L+2_1ss10GC	up	1.32482	0.405792	0.0267493	17.9132	23.7317	middle
bta-miR-92b	down	0.723134	-0.467665	0.0268543	24598.4	17787.9	high
chi-miR-18a-3p	down	0.7735	-0.370526	0.0272265	588.097	454.893	middle
bta-miR-486	down	0.681544	-0.55312	0.0276965	599.096	408.311	middle
hsa-miR-301b-5p	down	0.484523	-1.04536	0.0280077	19.5403	9.46772	middle
chi-miR-125a-3p	down	0.636245	-0.652345	0.0282908	255.243	162.397	middle
PC-5p-6227_1551	down	0.266862	-1.90583	0.0283866	514.551	137.314	middle
chi-miR-129-3p	down	0.784317	-0.350491	0.0291992	5558.74	4359.82	middle
chi-miR-374a-3p	up	1.76211	0.817308	0.0293609	51.1861	90.1958	middle
mmu-miR-1983	up	1.14319	0.19307	0.0295466	3203.24	3661.93	middle
hsa-miR-4508_L+2R-1	down	0.429135	-1.2205	0.0296678	127.251	54.6079	middle
mml-miR-9-3-3p_L-1R+2	up	4.08618	2.03075	0.0298663	5.06846	20.7106	middle
bta-miR-9-3p_L-1R+7	up	4.08618	2.03075	0.0298663	5.06846	20.7106	middle
chi-miR-877-3p_1ss22GT	down	0.714189	-0.485623	0.0304961	157.487	112.476	middle
chi-miR-342-3p_R+2	down	0.740667	-0.433103	0.030547	55670	41233	high
PC-5p-41723_154	up	inf	inf	0.0308129	0	18.9427	middle
chi-miR-374a-5p_R+1	up	1.43748	0.523546	0.0312515	457.219	657.245	middle
bta-miR-138	up	1.85131	0.888544	0.0317086	8.97665	16.6185	middle
chi-miR-25-5p	down	0.785377	-0.348542	0.0317392	641.197	503.581	middle
chi-miR-1306-3p_1ss22GT	down	0.818056	-0.289728	0.0319114	182.555	149.34	middle
chi-miR-491-5p_R+1	down	0.81721	-0.291221	0.0327115	691.257	564.902	middle
PC-3p-82098_46	up	inf	inf	0.0328546	0	3.02499	low
bta-miR-149-5p_R-2	down	0.738945	-0.436461	0.0330121	7105.62	5250.66	middle
bta-miR-339b_R+1	down	0.749383	-0.416224	0.0333296	53542.6	40123.9	high
PC-5p-11477_762	up	1.5895	0.66857	0.033395	57.3474	91.1535	middle
PC-5p-36993_182	up	5.79277	2.53425	0.033852	2.92614	16.9505	middle
bta-miR-193a-5p	down	0.699034	-0.516565	0.0345584	1914.75	1338.47	middle
ssc-mir-4332-p3_1ss7TC	down	0.0510202	-4.29279	0.0346616	26.6054	1.35741	middle
chi-miR-330-3p_L+1	down	0.736743	-0.440766	0.0348963	3465.11	2552.9	middle
PC-5p-29164_248	up	inf	inf	0.0357131	0	38.3337	middle
PC-5p-12897_666	up	2.01293	1.0093	0.0358427	17.6922	35.6133	middle
ssc-mir-9819-p5_1ss3GC	down	0.113256	-3.14234	0.0361725	96.2457	10.9004	middle
bta-miR-2284x_R+1_2	up	1.42029	0.506189	0.0369453	1314.95	1867.61	middle
bta-miR-2284x_R+1_1	up	1.42029	0.506189	0.0369453	1314.95	1867.61	middle
oan-miR-194-5p_R+1	up	1.75239	0.809327	0.0371031	6.1127	10.7119	middle
oan-miR-27b-3p_R+1	up	1.67886	0.747483	0.0372612	43.7642	73.474	middle
ggo-miR-203b	up	1.4727	0.55846	0.037612	99.8864	147.102	middle
chi-miR-141_R+1	up	1.18349	0.243048	0.0379919	750.799	888.563	middle
oan-miR-1386	down	0.636457	-0.651866	0.0381459	413.052	262.89	middle
cgr-miR-1260_L+2	up	1.70974	0.773777	0.038661	8.08316	13.8201	middle
chi-miR-128-5p	down	0.80547	-0.312096	0.038703	418.134	336.795	middle
bta-miR-2285ad_L+1R-1	up	2.04459	1.03181	0.0388882	17.8888	36.5752	middle
chi-mir-449c-p3	down	0.624938	-0.678214	0.0391798	8.55846	5.34851	low
chi-miR-99a-3p_1ss23TA	up	7.48824	2.90463	0.0393696	2.2636	16.9504	middle
bta-miR-2355-3p_R+1	up	1.58839	0.667567	0.0393872	65.9425	104.743	middle
chi-miR-194	up	1.26713	0.341561	0.0394243	867.731	1099.53	middle
chi-miR-425-5p_R+2	down	0.730309	-0.453421	0.0395814	2132.47	1557.36	middle
bta-miR-2285bz_R+1	up	inf	inf	0.0397372	0	3.4811	low
PC-5p-131061_14	up	inf	inf	0.0403351	0	5.77851	low
mmu-mir-1983-p5_1ss1GA	down	0.56521	-0.82314	0.0411646	150.59	85.1148	middle
bta-mir-2285t-p5_1ss15TC	up	inf	inf	0.0419281	0	8.41083	middle
chi-miR-340-3p_R+1	up	1.19313	0.254746	0.0421313	300.179	358.151	middle
chi-let-7a-5p	up	1.10306	0.141517	0.042364	231561	255427	high
cpo-let-7f-2-3p_1ss22CT	up	1.38654	0.471492	0.0428925	279.25	387.192	middle
chi-miR-29c-5p_L-2R+2	up	1.44844	0.534496	0.0435698	210.197	304.456	middle
chi-miR-147-3p_R+3	up	1.56499	0.646153	0.0440685	55.5369	86.9147	middle
bta-miR-181a_R+1	down	0.824781	-0.277916	0.0441856	3577.76	2950.87	middle
chi-miR-99b-5p	down	0.709895	-0.494323	0.044234	78143.6	55473.7	high
chi-miR-1296_R-2	down	0.778125	-0.361927	0.0442397	2021.75	1573.17	middle
chi-miR-34b-3p	down	0.533026	-0.907721	0.0445632	66.8005	35.6064	middle
ssc-miR-339-3p_1ss1AC	down	0.670913	-0.575801	0.0448518	489.914	328.69	middle
chi-miR-224-5p_R+2	down	0.909151	-0.137408	0.0453925	23226.2	21116.1	high
bta-mir-2285o-3-p5_1ss12TC	up	1.8634	0.897941	0.0457332	120.921	225.324	middle
chi-let-7d-3p_R+1	down	0.752428	-0.410375	0.046373	8351.21	6283.69	high
bta-miR-378c	up	1.87803	0.909218	0.0467799	26.1438	49.0988	middle
chi-miR-320-3p	down	0.666302	-0.585751	0.0467976	14555	9698.05	high
chi-miR-378-5p	down	0.702654	-0.509113	0.0473765	900.555	632.779	middle
bta-miR-2285bf_1ss20TC	up	inf	inf	0.0478648	0	3.50786	low
PC-3p-66135_72	up	inf	inf	0.0478648	0	7.01572	middle
bta-miR-1246_L-1R+2	down	0.857782	-0.221317	0.0481441	344.886	295.837	middle
bta-miR-139	down	0.72422	-0.465501	0.0482177	793.825	574.904	middle
bta-miR-2474	down	0.726092	-0.461775	0.0487086	46.3257	33.6367	middle
bta-miR-142-5p_L+2	up	7.23303	2.8546	0.0487165	2.46328	17.817	middle
mml-miR-152-5p	up	1.70106	0.766438	0.0492637	51.7727	88.0688	middle
chi-miR-16a-5p	up	1.25667	0.329603	0.04947	44634.9	56091.2	high
chi-miR-148b-5p_R+1	up	1.47005	0.555862	0.0494957	127.871	187.976	middle
chi-miR-27b-3p	up	1.17977	0.238505	0.0495209	371679	438496	high
PC-3p-50875_114	up	inf	inf	0.0496173	0	12.9514	middle
