# Supplementary material for: The mRNA and miRNA profiles of goat bronchial epithelial cells stimulated by Pasteurella multocida strains of serotype A and D
Source: PeerJ. 2022 Mar 18;10:e13047. doi: 10.7717/peerj.13047 (PMC8935994; doi:10.7717/peerj.13047)
Supplement: Table S4 [file peerj-10-13047-s004.xlsx]

## Sheet: Ctrl vs D_T4h
Total differentially expressed miRNAs in the P. multocida strain serotype D- stimulated group
miRNA_name	regulation	fold_change(D_T4h(mean)/Ctrl(mean))	log2(fold_change)	p-value	Ctrl(mean)	D_T4h(mean)	Expression level
hsa-miR-4508_L+2	down	0.195747	-2.35294	4.98325e-05	132.514	25.9392	middle
chi-miR-125b-5p_R+2	down	0.644486	-0.633779	6.20327e-05	289412	186522	high
mmu-miR-6240_L-1R-5_1ss21AG	down	0.373683	-1.42011	0.000210162	1095.3	409.295	middle
chi-miR-27b-5p_R+1	up	1.4196	0.50548	0.000229469	2679.71	3804.1	middle
chi-miR-25-3p	down	0.918963	-0.121921	0.000257856	23650.6	21734.1	high
mmu-mir-6240-p3_1ss24GT	down	0.3526	-1.50389	0.000293036	1858.09	655.164	middle
chi-miR-340-5p	up	1.74476	0.803031	0.000296247	609.885	1064.1	middle
mmu-mir-6240-p3_1ss25GT	down	0.362157	-1.46531	0.000316508	1996.39	723.006	middle
chi-let-7g-5p	up	1.46213	0.548068	0.00034663	69521.5	101649	high
chi-miR-98-5p	up	2.09761	1.06874	0.000362	690.219	1447.81	middle
chi-miR-26b-5p	up	1.72754	0.788721	0.000426228	3914.78	6762.95	middle
chi-miR-877-5p_R+3	down	0.64867	-0.624444	0.000426568	2070.84	1343.29	middle
chi-let-7f-5p	up	2.03844	1.02746	0.00042766	48563.8	98994.3	high
bta-miR-2284y_L+1R-1	up	1.35723	0.44067	0.000456075	258.589	350.966	middle
PC-5p-30232_237	up	15.1917	3.92521	0.000558407	2.71632	41.2654	middle
chi-miR-3432-3p	down	0.583376	-0.777501	0.000724185	582.733	339.953	middle
mmu-mir-6240-p3_1	down	0.333303	-1.58509	0.000809727	736.134	245.356	middle
mmu-mir-6240-p3_2	down	0.333303	-1.58509	0.000809727	736.134	245.356	middle
ssc-miR-7134-3p	down	0.59636	-0.745744	0.00095216	600.901	358.354	middle
bta-miR-2387_R+1	down	0.553617	-0.853039	0.000957934	2253.44	1247.54	middle
mmu-mir-6240-p3_1ss9GT_1	down	-inf	-inf	0.000969772	3.6175	0	low
mmu-mir-6240-p5_1ss9GT	down	-inf	-inf	0.000969772	3.6175	0	low
chi-miR-9-5p	up	1.67134	0.741009	0.00119911	9468.89	15825.8	high
chi-miR-7-5p	up	2.52047	1.3337	0.00120404	3996.38	10072.8	high
bta-miR-2285l_R-1	down	0.754246	-0.406892	0.00131914	8752.31	6601.4	high
bta-miR-7857-3p	down	0.548722	-0.865854	0.00139823	44021.6	24155.6	high
bta-miR-152_R-1	up	1.50909	0.593682	0.00140139	4653.39	7022.4	middle
chi-let-7i-5p	up	1.64535	0.718397	0.00141201	28392.6	46715.8	high
chi-miR-101-3p_R+2	up	2.053	1.03773	0.00144209	869.5	1785.08	middle
chi-miR-1307-5p_R+4	up	2.08594	1.0607	0.00147866	79.5209	165.876	middle
chi-miR-30e-3p_R+1	up	1.25878	0.332026	0.00149599	1001.44	1260.59	middle
chi-miR-1306-3p_1ss22GT	down	0.555795	-0.847376	0.00153795	182.555	101.463	middle
mmu-miR-92a-3p_R+2	down	0.615857	-0.699332	0.00171292	549.809	338.604	middle
PC-5p-14898_561	up	3.74422	1.90467	0.00171902	23.6095	88.3992	middle
mmu-mir-6240-p5_1ss15TG_1	down	0.510483	-0.970064	0.00172477	1339.78	683.933	middle
mmu-mir-6240-p5_1ss15TG_2	down	0.510483	-0.970064	0.00172477	1339.78	683.933	middle
PC-3p-85863_42	up	inf	inf	0.00172604	0	13.2626	middle
ssc-mir-1285-p5	down	0.14397	-2.79616	0.00174726	9795.84	1410.3	high
PC-3p-2741_3833	down	0.637573	-0.649338	0.00188625	402.324	256.511	middle
ssc-mir-4332-p3_1ss8TC	down	0.0923916	-3.4361	0.00191334	8.38677	0.774867	low
chi-miR-30f-5p_R+1	down	0.397221	-1.33199	0.00197426	189.887	75.4273	middle
chi-miR-146a	up	1.87828	0.909412	0.00198312	3840.16	7212.9	middle
mml-miR-574	down	0.627031	-0.673392	0.00198348	4991.57	3129.87	middle
chi-miR-148b-5p_R+1	up	1.60187	0.679757	0.00208761	127.871	204.832	middle
bta-mir-2904-2-p3	down	0.328304	-1.6069	0.00208974	617.074	202.588	middle
PC-3p-8606_1081	up	33.3107	5.05792	0.0020907	5.01624	167.095	middle
chi-miR-361-5p	down	0.750676	-0.413739	0.00211337	5960.56	4474.45	middle
chi-miR-499-5p	up	1.73184	0.792306	0.00213999	123.257	213.461	middle
bta-miR-339b	down	0.65095	-0.619382	0.0022118	11486.5	7477.11	high
bta-mir-2285e-2-p5	up	3.21228	1.6836	0.00241432	17.76	57.0502	middle
bta-mir-7857-1-p3_1ss1TC	down	0.525699	-0.92769	0.00250395	7832.81	4117.7	middle
PC-3p-7572_1247	down	0.382337	-1.38708	0.002559	173.887	66.4835	middle
bta-miR-11987_L-1R-2_1ss8TA	down	0.264917	-1.91639	0.00264584	50.4177	13.3565	middle
chi-miR-130b-5p	down	0.679529	-0.557393	0.00266652	3580.11	2432.79	middle
chi-miR-423-3p	down	0.548742	-0.8658	0.00279183	89189.3	48941.9	high
chi-miR-450-5p_R+2	up	1.73548	0.795337	0.0028513	466.399	809.428	middle
mml-miR-452-3p_L+2R-2	up	1.91375	0.936404	0.00294621	269.582	515.912	middle
chi-miR-21-5p	up	2.19168	1.13204	0.00304226	281898	617831	high
mmu-mir-6236-p5_5	down	0.39918	-1.32489	0.00304696	113.153	45.1683	middle
mmu-mir-6236-p3_1	down	0.39918	-1.32489	0.00304696	113.153	45.1683	middle
mmu-mir-6236-p5_1	down	0.39918	-1.32489	0.00304696	113.153	45.1683	middle
mmu-mir-6236-p5_2	down	0.39918	-1.32489	0.00304696	113.153	45.1683	middle
mmu-mir-6236-p5_7	down	0.39918	-1.32489	0.00304696	113.153	45.1683	middle
mmu-mir-6236-p3_2	down	0.39918	-1.32489	0.00304696	113.153	45.1683	middle
mmu-mir-6236-p5_6	down	0.39918	-1.32489	0.00304696	113.153	45.1683	middle
mmu-mir-6236-p5_3	down	0.39918	-1.32489	0.00304696	113.153	45.1683	middle
mmu-mir-6236-p5_4	down	0.39918	-1.32489	0.00304696	113.153	45.1683	middle
bta-mir-2285cq-p3_1ss11TC	up	2.09413	1.06635	0.00306322	112.419	235.421	middle
bta-mir-2399-p5_1ss3TA	up	inf	inf	0.00307372	0	52.0879	middle
chi-miR-92b	down	0.589207	-0.763153	0.0033034	83059.2	48939.1	high
bta-miR-101_R+2	up	3.26003	1.70489	0.00349746	18.262	59.5347	middle
chi-let-7c-3p	up	2.05828	1.04144	0.00363335	12.6834	26.1059	middle
bta-let-7f_R+1	up	1.86638	0.900241	0.00369638	500.12	933.413	middle
chi-miR-328-3p	down	0.667605	-0.582933	0.0036973	625.015	417.263	middle
hsa-miR-6529-3p_1ss15TC	down	0.627628	-0.672017	0.00386685	311.028	195.21	middle
chi-miR-191-5p_R+1	down	0.660373	-0.598647	0.00394077	104826	69224.4	high
bta-miR-11987_L-2R-1_1ss8TA	down	0.218884	-2.19176	0.00403471	825.852	180.765	middle
mml-miR-222-5p_L+2	up	3.6775	1.87873	0.00404528	266.427	979.784	middle
chi-miR-129-5p	down	0.714988	-0.48401	0.00404883	5891.46	4212.32	middle
cgr-miR-1260_1ss18AT	up	5.55828	2.47464	0.0041006	10.4743	58.2188	middle
cpo-let-7f-2-3p_1ss22CT	up	1.39472	0.479978	0.00415076	279.25	389.476	middle
PC-3p-4951_2010	down	0.754293	-0.406804	0.00418347	353.685	266.782	middle
bta-miR-2285cm_L+1R-2_1ss11AG	up	1.84831	0.88621	0.00419372	61.3371	113.37	middle
oan-miR-92b_2ss16AG22TA	down	0.608667	-0.716275	0.00449405	712.269	433.535	middle
bta-mir-2887-1-p5	down	0.381916	-1.38867	0.00457145	1451.99	554.537	middle
chi-miR-423-5p	down	0.633522	-0.658534	0.00457237	25830.9	16364.5	high
bta-miR-760-3p_R+2	down	0.497026	-1.00861	0.00457643	1245.4	618.997	middle
chi-miR-16b-3p	up	4.1828	2.06447	0.0046831	41.8963	175.244	middle
chi-miR-9-3p_R+2	up	2.77422	1.47208	0.0047056	503.107	1395.73	middle
PC-3p-23853_317	up	inf	inf	0.00474684	0	30.4643	middle
chi-miR-96	up	1.66718	0.737406	0.00482543	437.049	728.637	middle
mml-miR-92b-5p	down	0.554533	-0.850656	0.00483788	471.286	261.344	middle
chi-miR-338-3p_R+2	up	inf	inf	0.00487229	0	7.50539	low
chi-miR-188-5p	up	2.26897	1.18204	0.00490482	16.9382	38.4322	middle
PC-3p-5764_1694	up	2.04309	1.03075	0.00497226	88.7988	181.424	middle
mml-miR-9-3-3p_L-1R+2	up	5.74185	2.52152	0.00497996	5.06846	29.1023	middle
bta-miR-9-3p_L-1R+7	up	5.74185	2.52152	0.00497996	5.06846	29.1023	middle
cgr-miR-16-3p	up	4.18764	2.06614	0.00504042	21.471	89.9126	middle
chi-miR-146b-5p	up	1.5751	0.655439	0.00512313	663.253	1044.69	middle
bta-miR-2474	down	0.540071	-0.88878	0.00538894	46.3257	25.0191	middle
bta-miR-205	down	0.656063	-0.608095	0.00544736	995202	652915	high
chi-miR-374a-3p	up	2.6036	1.38051	0.00552203	51.1861	133.268	middle
cgr-miR-1260_L+1	up	2.34456	1.22932	0.00577649	15.6494	36.691	middle
PC-3p-35120_195	up	12.6748	3.66389	0.00580299	4.97992	63.1194	middle
bta-miR-11987_L-2_1ss8TA	down	0.300982	-1.73225	0.00596483	1154.11	347.367	middle
bta-miR-125b_R+1	down	0.67917	-0.558155	0.00597011	2347.49	1594.34	middle
bta-mir-2904-2-p5_1ss8TC	down	0.493314	-1.01942	0.00597799	4157.75	2051.08	middle
chi-miR-296-3p	down	0.542231	-0.883022	0.0060328	5070.64	2749.45	middle
chi-miR-1296_R-2	down	0.635563	-0.653894	0.00640702	2021.75	1284.95	middle
PC-3p-9125_1006	up	2.67084	1.41729	0.00641152	21.668	57.8718	middle
chi-miR-200a_R+2	up	1.45512	0.541143	0.00672753	25597.8	37248	high
bta-miR-744	down	0.751169	-0.412791	0.0068646	1408.25	1057.83	middle
bta-mir-2887-1-p3_1ss9TC	down	0.621158	-0.686968	0.00703926	979.864	608.651	middle
chi-miR-3431-3p	down	0.781289	-0.356072	0.00715018	1096.7	856.842	middle
bta-miR-7_R+1	up	inf	inf	0.00725079	0	18.9104	middle
chi-miR-582-5p_L+1	up	1.6164	0.692785	0.00731267	216.576	350.074	middle
oan-miR-205-5p_R+3_2	down	0.592922	-0.754086	0.00732784	3294.65	1953.47	middle
oan-miR-205-5p_R+3_1	down	0.592922	-0.754086	0.00732784	3294.65	1953.47	middle
bta-miR-450b_R+1_1ss9TC	up	2.09369	1.06605	0.00741814	118.399	247.891	middle
chi-miR-224-5p_R+2	down	0.698668	-0.517322	0.00745912	23226.2	16227.4	high
PC-5p-52466_109	up	inf	inf	0.00750188	0	9.06363	middle
hsa-miR-4508_L+2R-1	down	0.288485	-1.79343	0.00759947	127.251	36.71	middle
chi-miR-204-5p	down	0.81675	-0.292034	0.00768768	1014.74	828.787	middle
bta-miR-92b	down	0.676734	-0.563338	0.00777278	24598.4	16646.6	high
chi-miR-542-3p_R+2	up	inf	inf	0.00795094	0	9.57203	middle
PC-3p-13949_608	up	2.04028	1.02876	0.00813998	41.7622	85.2063	middle
chi-miR-200c	down	0.7222	-0.469529	0.00819969	180999	130717	high
bta-miR-7857-5p	down	0.696088	-0.522658	0.00837484	7188.01	5003.49	middle
hsa-miR-7977_R+3_1ss6AG	down	-inf	-inf	0.00838659	4.26188	0	low
PC-5p-41723_154	up	inf	inf	0.00840334	0	16.6869	middle
chi-mir-421-p5	up	1.55631	0.638129	0.00844056	58.4663	90.9916	middle
chi-miR-106b-3p_L+2	down	0.706347	-0.50155	0.00849391	10162.1	7177.99	high
bta-miR-652_R+1	down	0.766899	-0.382892	0.00871566	6330.46	4854.82	middle
bta-miR-2284x_R+1_2	up	1.44422	0.530288	0.00890263	1314.95	1899.07	middle
bta-miR-2284x_R+1_1	up	1.44422	0.530288	0.00890263	1314.95	1899.07	middle
bta-miR-664b_R+1	down	0.727969	-0.458052	0.00893242	401.371	292.186	middle
bta-miR-1839_R-2	up	1.3461	0.42879	0.00898059	351.089	472.603	middle
mmr-miR-1839_L+1R-1	up	1.3461	0.42879	0.00898059	351.089	472.603	middle
chi-miR-15b-3p	up	1.61848	0.694639	0.00926244	1438.56	2328.29	middle
bta-miR-24-3p_R-1_1ss21AG	up	4.45764	2.15628	0.00926789	10.0174	44.6541	middle
hsa-miR-4508_L+1	down	0.300283	-1.7356	0.0092807	52.5271	15.773	middle
oan-miR-1386_1ss18AT	up	inf	inf	0.00931637	0	8.01591	middle
mmu-let-7j_1ss8TG	up	1.46748	0.553337	0.00938891	57.3978	84.23	middle
chi-let-7e-3p_1ss22CT	down	0.564208	-0.825701	0.00947971	346.034	195.235	middle
chi-miR-25-5p	down	0.618012	-0.694293	0.00950944	641.197	396.267	middle
chi-miR-197-3p	down	0.664472	-0.589719	0.00976717	7023.07	4666.63	middle
ssc-miR-339-3p_1ss1AC	down	0.454335	-1.13817	0.00996807	489.914	222.585	middle
mmu-miR-200b-5p	down	0.690867	-0.533521	0.0100446	3485.52	2408.03	middle
PC-3p-9575_947	up	2.09243	1.06518	0.0105615	24.7528	51.7934	middle
mml-miR-23a-5p_L+2	down	0.582141	-0.78056	0.0107898	990.976	576.888	middle
PC-3p-7303_1297	up	14.7433	3.88199	0.0112862	8.5637	126.257	middle
chi-miR-361-3p_R+2	down	0.618006	-0.694307	0.0115601	3819.31	2360.35	middle
mmu-miR-5126_L-3_1ss18CT	down	0.258573	-1.95136	0.0115915	170.726	44.1452	middle
chi-miR-330-3p_L+1	down	0.629045	-0.668764	0.0116709	3465.11	2179.71	middle
PC-5p-41504_155	down	0.32949	-1.60169	0.0117056	48.8378	16.0915	middle
oan-miR-1386_L+1_1	down	0.367602	-1.44378	0.0117521	23.7396	8.72674	middle
oan-miR-1386_L+1_2	down	0.367602	-1.44378	0.0117521	23.7396	8.72674	middle
bta-miR-149-5p_R-2	down	0.601884	-0.732442	0.0118295	7105.62	4276.76	middle
chi-miR-429_R+1	up	1.4325	0.518531	0.0120361	2123.2	3041.47	middle
PC-3p-40995_158	up	inf	inf	0.0120621	0	13.0748	middle
chi-miR-320-3p	down	0.564567	-0.824784	0.0121953	14555	8217.29	high
PC-3p-96201_32	up	inf	inf	0.0123497	0	9.37571	middle
chi-miR-30c-5p_R+1	down	0.803339	-0.315918	0.0124705	49933.2	40113.3	high
PC-3p-57429_93	up	inf	inf	0.0127191	0	14.3866	middle
bta-miR-339b_R+1	down	0.633457	-0.658681	0.0131469	53542.6	33917	high
PC-5p-18082_443	up	4.1357	2.04813	0.0134165	9.79353	40.5031	middle
chi-miR-671-5p	up	1.98942	0.992345	0.013627	26.81	53.3362	middle
PC-5p-4485_2246	down	0.734256	-0.445645	0.0140549	228.568	167.828	middle
bta-miR-484	down	0.725766	-0.462424	0.0149312	6404.83	4648.4	middle
bta-miR-2285cj_L-1_1ss6TC	up	1.89568	0.922712	0.0150201	16.4187	31.1246	middle
bta-miR-2285bn_L-1_1ss7TG	up	1.89568	0.922712	0.0150201	16.4187	31.1246	middle
bta-mir-2285o-3-p5_1ss12TC	up	1.99155	0.993889	0.015021	120.921	240.819	middle
hsa-miR-10400-5p_R-3_1ss12GA	down	0.144741	-2.78846	0.0152677	33.0294	4.78069	middle
PC-5p-29164_248	up	inf	inf	0.0158559	0	130.055	middle
chi-miR-1307-3p	down	0.616443	-0.69796	0.0166917	2986.69	1841.13	middle
ssc-miR-146a-3p_1ss20CT	up	inf	inf	0.0175225	0	11.1281	middle
PC-5p-24097_314	up	3.82619	1.93591	0.0182594	4.3537	16.6581	middle
bta-miR-142-5p_L+2	up	6.30279	2.65599	0.0183377	2.46328	15.5256	middle
PC-5p-73749_58	up	inf	inf	0.0184149	0	6.2656	middle
bta-miR-6119-3p_L-1R-1	up	2.11754	1.08239	0.0184664	203.615	431.164	middle
chi-miR-1343_R-1	down	0.505038	-0.985535	0.0185117	1601.74	808.94	middle
PC-5p-61401_83	down	-inf	-inf	0.0185261	9.85246	0	middle
cgr-miR-1260_1ss1AC	up	inf	inf	0.018534	0	7.69958	middle
PC-3p-114965_21	up	inf	inf	0.018534	0	7.69958	low
bta-miR-1246_L-1R+2	down	0.658297	-0.603189	0.0186819	344.886	227.037	middle
PC-3p-19195_413	down	0.55952	-0.837739	0.0186938	37.9564	21.2374	middle
bta-miR-1949_1ss19TC	down	0.58393	-0.776133	0.0188634	122.306	71.4183	middle
chi-miR-449a-5p_R+1	up	1.93975	0.955868	0.0189705	184.104	357.114	middle
bta-mir-2284z-2-p5_1ss1AG	up	1.66546	0.735918	0.0190814	10.296	17.1475	middle
bta-mir-2284z-4-p5_1ss1AG	up	1.66546	0.735918	0.0190814	10.296	17.1475	middle
bta-mir-2285cx-p5_1ss1AG	up	1.66546	0.735918	0.0190814	10.296	17.1475	middle
bta-mir-2285ce-p5_1ss1AG	up	1.66546	0.735918	0.0190814	10.296	17.1475	middle
bta-miR-2285bb_1ss12GT	up	1.66546	0.735918	0.0190814	10.296	17.1475	middle
bta-mir-11986c-p5	up	2.20037	1.13775	0.0192655	52.4346	115.376	middle
bta-miR-2285b	up	6.89928	2.78645	0.0192973	2.0901	14.4202	middle
PC-3p-74610_57	up	inf	inf	0.01948	0	8.75581	middle
chi-miR-1248-5p_R+3	down	0.496394	-1.01044	0.0200304	112.272	55.7311	middle
chi-miR-27a-3p	up	1.23385	0.303164	0.020122	105540	130220	high
PC-3p-11664_749	up	1.60088	0.678862	0.0202875	35.6876	57.1314	middle
bta-miR-486	down	0.495307	-1.01361	0.0203049	599.096	296.737	middle
PC-3p-66135_72	up	inf	inf	0.0203062	0	5.9514	middle
PC-3p-97937_31	up	inf	inf	0.0205183	0	7.51177	low
bta-miR-452_L+3R-1	up	1.48415	0.569634	0.020655	3919.08	5816.49	middle
PC-5p-6227_1551	down	0.133193	-2.90841	0.0215757	514.551	68.5348	middle
bta-miR-503-5p_R+3	up	10.0442	3.32829	0.0220895	3.34416	33.5893	middle
PC-5p-64589_76	up	inf	inf	0.0227337	0	6.33788	middle
cja-miR-615_R-1	down	0.57773	-0.791533	0.0228601	912.249	527.033	middle
bta-mir-2284aa-3-p3_1	up	1.81876	0.862953	0.023637	81.5686	148.353	middle
bta-mir-2284aa-3-p3_2	up	1.81876	0.862953	0.023637	81.5686	148.353	middle
chi-miR-192-5p	up	1.69829	0.764079	0.0238064	1366.11	2320.04	middle
chi-let-7d-3p_R+1	down	0.664053	-0.590629	0.0239175	8351.21	5545.65	high
bta-miR-2285at_L+1_1ss17TC	down	0.793446	-0.333797	0.0247826	108.022	85.7098	middle
chi-miR-100-3p_R+1	up	6.00284	2.58564	0.0254854	5.60776	33.6625	middle
PC-5p-6660_1442	up	2.03238	1.02317	0.0256786	53.3174	108.362	middle
PC-5p-53914_104	down	0.147046	-2.76566	0.0257783	12.7338	1.87245	middle
chi-miR-17-3p_R-3	up	1.67769	0.746472	0.0260031	324.556	544.503	middle
ssc-mir-4332-p5_1ss1TC	down	0.220833	-2.17897	0.026182	207.288	45.776	middle
PC-5p-35405_193	up	inf	inf	0.0262144	0	11.9337	middle
chi-miR-99b-5p	down	0.652789	-0.615312	0.0262866	78143.6	51011.2	high
chi-miR-148a-3p	up	1.66839	0.738458	0.0266143	3174.71	5296.66	middle
bta-miR-2284ab_R+1	up	1.731	0.791602	0.0267363	12.3105	21.3094	middle
bta-mir-194b-p5	up	inf	inf	0.0267574	0	8.31947	middle
chi-miR-30e-5p	up	1.40601	0.491612	0.0269035	40048.6	56308.9	high
bta-miR-193a-5p	down	0.597343	-0.743369	0.0270234	1914.75	1143.76	middle
chi-miR-222-3p_R-1	down	0.729468	-0.455084	0.0271416	130731	95363.8	high
bta-miR-2285k_L-1R+1_2	up	2.01049	1.00754	0.0271626	17.621	35.4268	middle
bta-miR-2285k_L-1R+1_1	up	2.01049	1.00754	0.0271626	17.621	35.4268	middle
bta-miR-2285ad_L+1R-1	up	2.12666	1.08859	0.0272012	17.8888	38.0433	middle
bta-miR-2285bf_1ss20TC	up	inf	inf	0.027276	0	6.37497	low
PC-3p-19071_416	up	inf	inf	0.02768	0	59.8146	middle
PC-3p-38365_173	down	0.300422	-1.73494	0.0282843	23.6971	7.11913	middle
chi-miR-24-3p	up	1.35417	0.43741	0.0285284	91421.8	123801	high
PC-3p-83554_45	up	inf	inf	0.0286693	0	5.64145	middle
ssc-mir-4332-p3_1ss7TC	down	0.0938381	-3.41368	0.0288404	26.6054	2.4966	middle
PC-3p-92405_36	up	inf	inf	0.0291154	0	11.405	middle
bta-miR-1246_R+2	down	0.682173	-0.55179	0.0291785	776.236	529.528	middle
chi-miR-125a-5p_R+2	down	0.601926	-0.732341	0.0298556	26840	16155.7	high
bta-miR-1260b	up	1.75047	0.807744	0.0299403	82.8084	144.954	middle
bta-mir-2285n-5-p3	up	1.71875	0.78136	0.0300684	19.8517	34.1202	middle
bta-miR-6119-5p	up	3.44221	1.78333	0.0301103	740.963	2550.55	middle
chi-miR-106b-5p	up	2.21996	1.15053	0.030463	1262.74	2803.24	middle
lla-miR-181a-3p	up	1.40773	0.493375	0.0305245	532.065	749.006	middle
chi-miR-2318	up	2.14849	1.10333	0.0305611	96.5877	207.518	middle
chi-miR-196a_R+1	up	1.73673	0.796376	0.0313545	187.598	325.808	middle
chi-miR-378-3p	down	0.853425	-0.228663	0.0316405	59451.3	50737.2	high
chi-miR-15a-3p_1ss22AT	up	1.95895	0.970082	0.0317076	25.1674	49.3016	middle
PC-5p-94397_34	up	5.1881	2.37521	0.0317566	2.2636	11.7438	middle
chi-miR-34b-3p	down	0.474194	-1.07645	0.0320019	66.8005	31.6764	middle
bta-mir-2284z-1-p3	up	inf	inf	0.0320424	0	9.02845	middle
mmu-miR-30d-5p_L+2R+2	up	inf	inf	0.0327193	0	7.3875	low
PC-5p-36993_182	up	9.4521	3.24064	0.0328999	2.92614	27.6582	middle
oan-mir-150-p5_1ss4CT	down	0.116978	-3.0957	0.0330003	8.00345	0.936224	middle
chi-miR-22-5p_R+1	up	1.52907	0.612654	0.0330408	441.363	674.874	middle
PC-5p-16752_487	down	0.67137	-0.57482	0.0335929	52.9934	35.5782	middle
PC-3p-45056_138	up	inf	inf	0.0337517	0	13.3063	middle
chi-miR-20a-5p	up	1.83495	0.875744	0.034477	15846	29076.8	high
PC-3p-23580_322	up	3.35134	1.74474	0.0361065	5.21954	17.4925	middle
mml-miR-34a-3p_L+1R-1	up	9.16531	3.19618	0.0363328	10.2358	93.814	middle
PC-3p-75922_55	up	inf	inf	0.0372999	0	4.68998	low
chi-miR-28-5p	up	1.10171	0.139749	0.0386581	2704.09	2979.13	middle
chi-miR-92a-5p	up	1.34056	0.422834	0.0387035	569.459	763.393	middle
chi-miR-99a-3p_1ss23TA	up	4.99722	2.32112	0.0389881	2.2636	11.3117	middle
PC-5p-51396_112	up	3.06723	1.61694	0.0390967	4.80642	14.7424	middle
chi-miR-301b	up	6.22941	2.6391	0.0392478	2.92614	18.2281	middle
chi-miR-455-5p	up	1.55252	0.634612	0.039537	677.323	1051.56	middle
rno-miR-26a-5p_L+2	up	6.62723	2.72841	0.0399026	2.46328	16.3247	middle
chi-miR-30b-5p	up	1.65293	0.725022	0.0401916	8306.29	13729.7	high
bta-mir-2285bz-p3_1ss19TC	up	2.74012	1.45424	0.0409146	6.05803	16.5997	middle
bta-miR-196a_R+1	up	1.81671	0.861328	0.0409316	77.2134	140.274	middle
PC-3p-24818_303	down	0.64773	-0.626535	0.0411372	39.1386	25.3513	middle
PC-3p-79612_50	up	inf	inf	0.0414389	0	10.624	middle
hsa-miR-301b-5p	down	0.302139	-1.72671	0.0421059	19.5403	5.90388	middle
PC-3p-79333_50	up	inf	inf	0.0422482	0	15.7901	middle
chi-miR-30b-3p	down	0.779999	-0.358457	0.0423929	199.718	155.78	middle
PC-3p-63161_79	up	4.00764	2.00275	0.0425111	5.04604	20.2227	middle
bta-miR-139	down	0.698371	-0.517934	0.0431445	793.825	554.384	middle
chi-miR-30d-3p_L+1	up	1.73182	0.792288	0.043437	51.9983	90.0516	middle
bta-miR-2478_L-2	up	1.55827	0.639945	0.0435229	7223.24	11255.8	high
PC-3p-13692_621	up	1.6439	0.717118	0.0437566	61.3581	100.866	middle
chi-miR-16a-5p	up	1.32356	0.404425	0.0451963	44634.9	59077	high
chi-let-7f-3p_1ss22CT	up	1.68984	0.756889	0.0461901	149.975	253.434	middle
ssc-mir-9819-p5_1ss3GC	down	0.237971	-2.07114	0.0463089	96.2457	22.9037	middle
bta-mir-2284z-2-p3_1ss22GT	up	1.43041	0.516425	0.0463747	143.471	205.222	middle
chi-miR-3432-5p	down	0.679836	-0.55674	0.0467612	7882.22	5358.62	high
PC-3p-76597_54	up	inf	inf	0.0472724	0	8.51367	middle
chi-miR-424-5p_R+1	up	4.15315	2.05421	0.0474278	13.1305	54.533	middle
bta-miR-11980_R-1_1ss4CG	down	0.212788	-2.23251	0.0477185	805.676	171.438	middle
bta-miR-760-5p_R+2	down	0.339583	-1.55816	0.0486373	33.0858	11.2354	middle
mml-let-7a-2-3p	up	1.75868	0.814491	0.0490566	45.7394	80.4408	middle
chi-miR-129-3p	down	0.74489	-0.4249	0.0497474	5558.74	4140.65	middle
