# Supplementary material for: The mRNA and miRNA profiles of goat bronchial epithelial cells stimulated by Pasteurella multocida strains of serotype A and D
Source: PeerJ. 2022 Mar 18;10:e13047. doi: 10.7717/peerj.13047 (PMC8935994; doi:10.7717/peerj.13047)
Supplement: Table S5 [file peerj-10-13047-s005.xlsx]

## Sheet: Sheet1
Analysis of qRT-PCR data
sample	gene	Cт	mean CT	△CT	△△CT	2^(-△△CT)	fc	log2(fc)
Ctrl (A_4h & D_4h)	GAPDH	20.7069	20.7508	0	0	1	1	0
Ctrl (A_4h & D_4h)	GAPDH	20.8346
Ctrl (A_4h & D_4h)	GAPDH	20.7108
Ctrl (A_4h)	IRF7	25.9478	25.6697	4.91898	0	1	1	0
Ctrl (A_4h)	IRF7	25.5234
Ctrl (A_4h)	IRF7	25.538
Ctrl (A_4h)	IL1A	24.884	24.835	4.0842	0	1	1	0
Ctrl (A_4h)	IL1A	24.8008
Ctrl (A_4h)	IL1A	24.8201
Ctrl (A_4h)	TNFSF18	27.7969	27.7564	7.00568	0	1	1	0
Ctrl (A_4h)	TNFSF18	27.7033
Ctrl (A_4h)	TNFSF18	27.7692
Ctrl (D_4h)	SPP1	27.9062	27.7589	7.00815	0	1	1	0
Ctrl (D_4h)	SPP1	27.6042
Ctrl (D_4h)	SPP1	27.7663
Ctrl (D_4h)	DUSP4	30.0436	29.8849	9.13414	0	1	1	0
Ctrl (D_4h)	DUSP4	29.9874
Ctrl (D_4h)	DUSP4	29.6237
Ctrl (D_4h)	IL12RB2	35.5365	35.8713	15.1205	0	1	1	0
Ctrl (D_4h)	IL12RB2	36.2061
Ctrl (D_4h)	IL12RB2	38.2011
Ctrl (D_4h)	IL6R	29.3025	29.4648	8.71403	0	1	1	0
Ctrl (D_4h)	IL6R	29.6271
Ctrl (D_4h)	IL6R	27.7061
Ctrl (D_4h)	CARD14	31.9578	31.2655	10.5147	0	1	1	0
Ctrl (D_4h)	CARD14	31.1006
Ctrl (D_4h)	CARD14	31.4303
A_4h	GAPDH	18.8516	18.8523	0	0	1	1	0
A_4h	GAPDH	18.872
A_4h	GAPDH	18.8332
A_4h	IRF7	27.3496	27.2062	8.35391	3.43493	0.0924659	0.0924659	-3.43493
A_4h	IRF7	27.0408
A_4h	IRF7	27.2282
A_4h	IL1A	23.556	23.6361	4.78382	0.699624	0.615733	0.615733	-0.699624
A_4h	IL1A	23.6582
A_4h	IL1A	23.6941
A_4h	TNFSF18	30.0875	30.8137	11.9614	4.95571	0.0322243	0.0322243	-4.95571
A_4h	TNFSF18	30.8202
A_4h	TNFSF18	30.8071
D_4h	GAPDH	18.926	19.025	0	0	1	1	0
D_4h	GAPDH	19.0697
D_4h	GAPDH	19.0792
D_4h	SPP1	27.4244	27.4751	8.45015	1.442	0.368056	0.368056	-1.45683
D_4h	SPP1	27.3609
D_4h	SPP1	27.64
D_4h	DUSP4	30.3188	30.2733	11.2484	2.11425	0.230966	0.230966	-2.12907
D_4h	DUSP4	30.1885
D_4h	DUSP4	30.3127
D_4h	IL12RB2	33.5618	33.5461	14.5211	-0.599412	1.5151	1.5151	0.584586
D_4h	IL12RB2	33.5303
D_4h	IL12RB2	32.9264
D_4h	IL6R	27.3255	27.3266	8.30162	-0.412414	1.33091	1.33091	0.397588
D_4h	IL6R	27.3594
D_4h	IL6R	27.2948
D_4h	CARD14	30.0641	30.0177	10.9928	0.478057	0.717944	0.717944	-0.478057
D_4h	CARD14	29.9713
D_4h	CARD14	29.4472
Ctrl (A_4h)	U6	24.8373	24.8421	0	0	1	1	0
Ctrl (A_4h)	U6	24.828
Ctrl (A_4h)	U6	24.8609
Ctrl (A_4h)	Chi-let-7i-5p	23.4845	23.4902	-1.3519	0	1	1	0
Ctrl (A_4h)	Chi-let-7i-5p	23.433
Ctrl (A_4h)	Chi-let-7i-5p	23.553
Ctrl (A_4h)	Chi-miR-15b-3p	25.5505	25.5962	0.754133	0	1	1	0
Ctrl (A_4h)	Chi-miR-15b-3p	25.5912
Ctrl (A_4h)	Chi-miR-15b-3p	25.647
A_4h	U6	25.6273	25.5938	0	0	1	1	0
A_4h	U6	25.5979
A_4h	U6	25.5561
A_4h	Chi-let-7i-5p	23.6383	23.5609	-2.0329	-0.681008	1.60326	1.60326	0.681008
A_4h	Chi-let-7i-5p	23.5038
A_4h	Chi-let-7i-5p	23.5406
A_4h	Chi-miR-15b-3p	25.3991	25.3936	-0.200204	-0.954337	1.93769	1.93769	0.954337
A_4h	Chi-miR-15b-3p	25.4096
A_4h	Chi-miR-15b-3p	25.372
Ctrl (D_4h)	U6	15.5567	16.3888	0	0	1	1	0
Ctrl (D_4h)	U6	15.3968
Ctrl (D_4h)	U6	18.2129
Ctrl (D_4h)	bta-miR-138	29.6309	29.5982	13.2095	0	1	1	0
Ctrl (D_4h)	bta-miR-138	29.5953
Ctrl (D_4h)	bta-miR-138	29.5685
Ctrl (D_4h)	bta-miR-2285i_R+1_1ss6CT	29.3539	29.4045	13.0158	0	1	1	0
Ctrl (D_4h)	bta-miR-2285i_R+1_1ss6CT	29.4079
Ctrl (D_4h)	bta-miR-2285i_R+1_1ss6CT	29.4519
D_4h	U6	15.5824	16.5459	0	0	1	1	0
D_4h	U6	15.5531
D_4h	U6	18.5024
D_4h	bta-miR-138	29.3546	29.3524	12.8065	-0.402987	1.32224	1.32224	0.402987
D_4h	bta-miR-138	29.3707
D_4h	bta-miR-138	29.332
D_4h	bta-miR-2285i_R+1_1ss6CT	29.3543	29.3492	12.8033	-0.212476	1.15868	1.15868	0.212476
D_4h	bta-miR-2285i_R+1_1ss6CT	29.3689
D_4h	bta-miR-2285i_R+1_1ss6CT	29.3245
