# Supplementary material for: The mRNA and miRNA profiles of goat bronchial epithelial cells stimulated by Pasteurella multocida strains of serotype A and D
Source: PeerJ. 2022 Mar 18;10:e13047. doi: 10.7717/peerj.13047 (PMC8935994; doi:10.7717/peerj.13047)
Supplement: Table S6 [file peerj-10-13047-s006.xlsx]

## Sheet: Ctrl vs A_T4h
Prediction of miRNA target genes in the P. multocida strain serotype A- stimulated group
miRNA ID	Gene ID	Symbol	Gene Annoation
chi-miR-491-5p_R+1	102188250	ADAP2	PREDICTED: arf-GAP with dual PH domain-containing protein 2 isoform X3 [Capra hircus]
bta-miR-138	102185858	ADCY7	PREDICTED: adenylate cyclase type 7 isoform X4 [Ovis aries musimon]
PC-3p-86338_42	102185858	ADCY7	PREDICTED: adenylate cyclase type 7 isoform X4 [Ovis aries musimon]
PC-5p-48517_123	102185858	ADCY7	PREDICTED: adenylate cyclase type 7 isoform X4 [Ovis aries musimon]
chi-let-7a-3p_1ss22CT	102178091	ADM	PREDICTED: ADM isoform X2 [Ovis aries musimon]
chi-miR-365-3p	102178091	ADM	PREDICTED: ADM isoform X2 [Ovis aries musimon]
bta-miR-194b	102168594	AMIGO1	AMIGO1 [Cervus elaphus hippelaphus]
bta-miR-194b-3p_L+1R-2	102168594	AMIGO1	AMIGO1 [Cervus elaphus hippelaphus]
chi-miR-378-5p	102168594	AMIGO1	AMIGO1 [Cervus elaphus hippelaphus]
chi-miR-491-5p_R+1	102168594	AMIGO1	AMIGO1 [Cervus elaphus hippelaphus]
hsa-miR-1260a_R+2_1ss9TG	102168594	AMIGO1	AMIGO1 [Cervus elaphus hippelaphus]
mml-miR-210-5p_1ss5CA	102168594	AMIGO1	AMIGO1 [Cervus elaphus hippelaphus]
bta-miR-2285f	100861074	ANKRD37	PREDICTED: ankyrin repeat domain-containing protein 37 isoform X4 [Capra hircus]
mmu-mir-1983-p5_1ss1GA	100861074	ANKRD37	PREDICTED: ankyrin repeat domain-containing protein 37 isoform X4 [Capra hircus]
bta-miR-378c	102188120	APLN	PREDICTED: apelin [Capra hircus]
chi-let-7b-5p	102188120	APLN	PREDICTED: apelin [Capra hircus]
hsa-miR-1260a_R+2_1ss9TG	102188120	APLN	PREDICTED: apelin [Capra hircus]
chi-miR-365-3p	102170686	ARRDC2	PREDICTED: arrestin domain-containing protein 2 isoform X2 [Capra hircus]
chi-miR-455-3p	102170686	ARRDC2	PREDICTED: arrestin domain-containing protein 2 isoform X2 [Capra hircus]
chi-let-7g-3p_1ss22CT	102176255	B3GNT9	PREDICTED: UDP-GlcNAc:betaGal beta-1,3-N-acetylglucosaminyltransferase 9 [Capra hircus]
chi-miR-20a-3p_R+2	102176255	B3GNT9	PREDICTED: UDP-GlcNAc:betaGal beta-1,3-N-acetylglucosaminyltransferase 9 [Capra hircus]
mmu-miR-1983	102176255	B3GNT9	PREDICTED: UDP-GlcNAc:betaGal beta-1,3-N-acetylglucosaminyltransferase 9 [Capra hircus]
PC-5p-29464_244	102176255	B3GNT9	PREDICTED: UDP-GlcNAc:betaGal beta-1,3-N-acetylglucosaminyltransferase 9 [Capra hircus]
bta-miR-138	102179639	BEST1	PREDICTED: bestrophin-1 isoform X2 [Ovis aries musimon]
bta-miR-2285f	102179639	BEST1	PREDICTED: bestrophin-1 isoform X2 [Ovis aries musimon]
chi-miR-491-5p_R+1	102179639	BEST1	PREDICTED: bestrophin-1 isoform X2 [Ovis aries musimon]
mmu-miR-205-3p	102179639	BEST1	PREDICTED: bestrophin-1 isoform X2 [Ovis aries musimon]
PC-3p-50875_114	102179639	BEST1	PREDICTED: bestrophin-1 isoform X2 [Ovis aries musimon]
chi-miR-491-5p_R+1	102178036	BNIP3	PREDICTED: BCL2/adenovirus E1B 19 kDa protein-interacting protein 3 isoform X3 [Ovis aries musimon]
PC-5p-131061_14	102178036	BNIP3	PREDICTED: BCL2/adenovirus E1B 19 kDa protein-interacting protein 3 isoform X3 [Ovis aries musimon]
chi-miR-27b-3p	102178709	BRSK2	serine/threonine-protein kinase BRSK2 isoform X7 [Bos taurus]
oan-miR-27b-3p_R+1	102178709	BRSK2	serine/threonine-protein kinase BRSK2 isoform X7 [Bos taurus]
PC-5p-110911_23	102178709	BRSK2	serine/threonine-protein kinase BRSK2 isoform X7 [Bos taurus]
chi-miR-455-3p	102190585	C28H10orf99	PREDICTED: secreted protein C10orf99 homolog [Capra hircus]
PC-5p-12897_666	102190585	C28H10orf99	PREDICTED: secreted protein C10orf99 homolog [Capra hircus]
chi-miR-141_R+1	102185724	CACNA1I	PREDICTED: LOW QUALITY PROTEIN: voltage-dependent T-type calcium channel subunit alpha-1I [Capra hircus]
chi-miR-491-5p_R+1	102185724	CACNA1I	PREDICTED: LOW QUALITY PROTEIN: voltage-dependent T-type calcium channel subunit alpha-1I [Capra hircus]
hsa-miR-1260a_R+2_1ss9TG	102185724	CACNA1I	PREDICTED: LOW QUALITY PROTEIN: voltage-dependent T-type calcium channel subunit alpha-1I [Capra hircus]
mml-miR-210-5p_1ss5CA	102185724	CACNA1I	PREDICTED: LOW QUALITY PROTEIN: voltage-dependent T-type calcium channel subunit alpha-1I [Capra hircus]
PC-3p-86338_42	102185724	CACNA1I	PREDICTED: LOW QUALITY PROTEIN: voltage-dependent T-type calcium channel subunit alpha-1I [Capra hircus]
bta-miR-181b_R+2	102182803	CACNB2	PREDICTED: voltage-dependent L-type calcium channel subunit beta-2 isoform X7 [Capra hircus]
chi-let-7g-3p_1ss22CT	102182803	CACNB2	PREDICTED: voltage-dependent L-type calcium channel subunit beta-2 isoform X7 [Capra hircus]
chi-miR-194	102182803	CACNB2	PREDICTED: voltage-dependent L-type calcium channel subunit beta-2 isoform X7 [Capra hircus]
chi-miR-27b-3p	102182803	CACNB2	PREDICTED: voltage-dependent L-type calcium channel subunit beta-2 isoform X7 [Capra hircus]
oan-miR-27b-3p_R+1	102182803	CACNB2	PREDICTED: voltage-dependent L-type calcium channel subunit beta-2 isoform X7 [Capra hircus]
PC-3p-50875_114	102182803	CACNB2	PREDICTED: voltage-dependent L-type calcium channel subunit beta-2 isoform X7 [Capra hircus]
chi-miR-504_R+1	102176355	CCDC114	PREDICTED: coiled-coil domain-containing protein 114 isoform X3 [Capra hircus]
PC-3p-86338_42	102176355	CCDC114	PREDICTED: coiled-coil domain-containing protein 114 isoform X3 [Capra hircus]
chi-miR-455-3p	102191092	CDA	cytidine deaminase [Bos taurus]
PC-3p-86338_42	102191092	CDA	cytidine deaminase [Bos taurus]
chi-let-7b-5p	102178227	CDC42SE1	CDC42SE1 [Cricetulus griseus]
chi-miR-378-5p	102178227	CDC42SE1	CDC42SE1 [Cricetulus griseus]
chi-miR-504_R+1	102178227	CDC42SE1	CDC42SE1 [Cricetulus griseus]
hsa-miR-1260a_R+2_1ss9TG	102178227	CDC42SE1	CDC42SE1 [Cricetulus griseus]
bta-miR-378c	102171182	CENPBD1	PREDICTED: CENPB DNA-binding domain-containing protein 1 [Capra hircus]
mmu-miR-1983	102171182	CENPBD1	PREDICTED: CENPB DNA-binding domain-containing protein 1 [Capra hircus]
mmu-miR-205-3p	102171182	CENPBD1	PREDICTED: CENPB DNA-binding domain-containing protein 1 [Capra hircus]
bta-miR-2285bd_L+2_1ss10GC	102169571	CPEB2	PREDICTED: cytoplasmic polyadenylation element-binding protein 2 isoform X6 [Capra hircus]
chi-let-7b-5p	102169571	CPEB2	PREDICTED: cytoplasmic polyadenylation element-binding protein 2 isoform X6 [Capra hircus]
chi-miR-194	102169571	CPEB2	PREDICTED: cytoplasmic polyadenylation element-binding protein 2 isoform X6 [Capra hircus]
chi-miR-20a-3p_R+2	102169571	CPEB2	PREDICTED: cytoplasmic polyadenylation element-binding protein 2 isoform X6 [Capra hircus]
mmu-mir-1983-p5_1ss1GA	102169571	CPEB2	PREDICTED: cytoplasmic polyadenylation element-binding protein 2 isoform X6 [Capra hircus]
mmu-miR-205-3p	102169571	CPEB2	PREDICTED: cytoplasmic polyadenylation element-binding protein 2 isoform X6 [Capra hircus]
PC-5p-131061_14	102169571	CPEB2	PREDICTED: cytoplasmic polyadenylation element-binding protein 2 isoform X6 [Capra hircus]
PC-5p-29464_244	102169571	CPEB2	PREDICTED: cytoplasmic polyadenylation element-binding protein 2 isoform X6 [Capra hircus]
mmu-miR-1983	102178403	DAG1	PREDICTED: dystroglycan [Capra hircus]
PC-5p-110911_23	102178403	DAG1	PREDICTED: dystroglycan [Capra hircus]
bta-miR-378c	102185968	DCUN1D3	DCN1-like protein 3 [Ovis aries]
chi-let-7b-5p	102185968	DCUN1D3	DCN1-like protein 3 [Ovis aries]
chi-miR-141_R+1	102185968	DCUN1D3	DCN1-like protein 3 [Ovis aries]
chi-miR-20a-3p_R+2	102185968	DCUN1D3	DCN1-like protein 3 [Ovis aries]
chi-miR-491-5p_R+1	102185968	DCUN1D3	DCN1-like protein 3 [Ovis aries]
PC-5p-29464_244	102185968	DCUN1D3	DCN1-like protein 3 [Ovis aries]
chi-miR-455-3p	102179052	DEGS2	PREDICTED: sphingolipid delta(4)-desaturase/C4-monooxygenase DES2 isoform X1 [Capra hircus]
chi-miR-455-3p	102187803	DLG4	PREDICTED: disks large homolog 4 isoform X2 [Camelus bactrianus]
bta-miR-138	102187159	DNAAF3	PREDICTED: dynein assembly factor 3, axonemal isoform X6 [Capra hircus]
PC-5p-131061_14	102189927	DOC2A	PREDICTED: double C2-like domain-containing protein alpha [Vicugna pacos]
chi-miR-125a-3p	102169974	EFNB2	ephrin-B2 [Ovis aries]
chi-miR-27b-3p	102169974	EFNB2	ephrin-B2 [Ovis aries]
oan-miR-27b-3p_R+1	102169974	EFNB2	ephrin-B2 [Ovis aries]
PC-5p-19612_402	102169974	EFNB2	ephrin-B2 [Ovis aries]
mmu-miR-205-3p	102179524	EGLN3	rCG62399 [Rattus norvegicus]
PC-5p-12897_666	102179524	EGLN3	rCG62399 [Rattus norvegicus]
ptr-miR-877_R+4	102179524	EGLN3	rCG62399 [Rattus norvegicus]
chi-let-7g-3p_1ss22CT	106501749	FOXC2	PREDICTED: forkhead box protein C2 [Capra hircus]
chi-miR-125a-3p	106501749	FOXC2	PREDICTED: forkhead box protein C2 [Capra hircus]
hsa-miR-1260a_R+2_1ss9TG	102185425	FOXO6	PREDICTED: forkhead box protein O6 isoform X2 [Capra hircus]
PC-5p-110911_23	102185425	FOXO6	PREDICTED: forkhead box protein O6 isoform X2 [Capra hircus]
mml-miR-210-5p_1ss5CA	102185801	GJB3	PREDICTED: gap junction beta-3 protein isoform X2 [Ovis aries musimon]
mmu-miR-1983	102185801	GJB3	PREDICTED: gap junction beta-3 protein isoform X2 [Ovis aries musimon]
PC-3p-50875_114	102185801	GJB3	PREDICTED: gap junction beta-3 protein isoform X2 [Ovis aries musimon]
bta-miR-2285f	102178142	GLI3	PREDICTED: transcriptional activator GLI3 [Capra hircus]
chi-let-7g-3p_1ss22CT	102178142	GLI3	PREDICTED: transcriptional activator GLI3 [Capra hircus]
chi-miR-141_R+1	102178142	GLI3	PREDICTED: transcriptional activator GLI3 [Capra hircus]
chi-miR-20a-3p_R+2	102178142	GLI3	PREDICTED: transcriptional activator GLI3 [Capra hircus]
chi-miR-455-3p	102178142	GLI3	PREDICTED: transcriptional activator GLI3 [Capra hircus]
chi-miR-491-5p_R+1	102178142	GLI3	PREDICTED: transcriptional activator GLI3 [Capra hircus]
bta-miR-2285bd_L+2_1ss10GC	102176547	GLTP	unnamed protein product, partial [Gulo gulo]
chi-miR-141_R+1	102176547	GLTP	unnamed protein product, partial [Gulo gulo]
mmu-miR-205-3p	102176547	GLTP	unnamed protein product, partial [Gulo gulo]
PC-5p-110911_23	102169841	GNB3	guanine nucleotide-binding protein G(I)/G(S)/G(T) subunit beta-3 isoform X2 [Equus caballus]
bta-miR-138	102191053	GPATCH2L	PREDICTED: G patch domain-containing protein 2-like isoform X3 [Capra hircus]
chi-miR-141_R+1	102191053	GPATCH2L	PREDICTED: G patch domain-containing protein 2-like isoform X3 [Capra hircus]
chi-miR-194	102191053	GPATCH2L	PREDICTED: G patch domain-containing protein 2-like isoform X3 [Capra hircus]
chi-miR-491-5p_R+1	102191053	GPATCH2L	PREDICTED: G patch domain-containing protein 2-like isoform X3 [Capra hircus]
hsa-miR-1260a_R+2_1ss9TG	102191053	GPATCH2L	PREDICTED: G patch domain-containing protein 2-like isoform X3 [Capra hircus]
mmu-miR-1983	102191053	GPATCH2L	PREDICTED: G patch domain-containing protein 2-like isoform X3 [Capra hircus]
mmu-miR-205-3p	102191053	GPATCH2L	PREDICTED: G patch domain-containing protein 2-like isoform X3 [Capra hircus]
PC-3p-50875_114	102191053	GPATCH2L	PREDICTED: G patch domain-containing protein 2-like isoform X3 [Capra hircus]
PC-5p-12897_666	102191053	GPATCH2L	PREDICTED: G patch domain-containing protein 2-like isoform X3 [Capra hircus]
PC-5p-131061_14	102191053	GPATCH2L	PREDICTED: G patch domain-containing protein 2-like isoform X3 [Capra hircus]
chi-miR-141_R+1	102184780	GPR85	probable G-protein coupled receptor 85 isoform X2 [Bos indicus x Bos taurus]
chi-miR-194	102184780	GPR85	probable G-protein coupled receptor 85 isoform X2 [Bos indicus x Bos taurus]
chi-miR-20a-3p_R+2	102184780	GPR85	probable G-protein coupled receptor 85 isoform X2 [Bos indicus x Bos taurus]
PC-5p-131061_14	102184780	GPR85	probable G-protein coupled receptor 85 isoform X2 [Bos indicus x Bos taurus]
PC-5p-29464_244	102184780	GPR85	probable G-protein coupled receptor 85 isoform X2 [Bos indicus x Bos taurus]
bta-miR-181b_R+2	102178968	GPRC5B	GPRC5B [Cervus elaphus hippelaphus]
hsa-miR-1260a_R+2_1ss9TG	106503241	HES7	transcription factor HES-7 isoform X1 [Bos taurus]
PC-5p-12897_666	106503241	HES7	transcription factor HES-7 isoform X1 [Bos taurus]
chi-miR-455-3p	102177693	HOXC11	PREDICTED: homeobox protein Hox-C11 isoform X2 [Chlorocebus sabaeus]
PC-3p-53833_104	102177693	HOXC11	PREDICTED: homeobox protein Hox-C11 isoform X2 [Chlorocebus sabaeus]
bta-miR-194b	102176690	HS3ST5	heparan sulfate glucosamine 3-O-sulfotransferase 5 [Bos taurus]
bta-miR-194b-3p_L+1R-2	102176690	HS3ST5	heparan sulfate glucosamine 3-O-sulfotransferase 5 [Bos taurus]
chi-miR-378-5p	102176690	HS3ST5	heparan sulfate glucosamine 3-O-sulfotransferase 5 [Bos taurus]
bta-miR-194b	102178688	IQCK	PREDICTED: IQ domain-containing protein K [Capra hircus]
bta-miR-194b-3p_L+1R-2	102178688	IQCK	PREDICTED: IQ domain-containing protein K [Capra hircus]
mmu-miR-1983	102178688	IQCK	PREDICTED: IQ domain-containing protein K [Capra hircus]
mmu-mir-1983-p5_1ss1GA	102178688	IQCK	PREDICTED: IQ domain-containing protein K [Capra hircus]
ptr-miR-877_R+4	102178688	IQCK	PREDICTED: IQ domain-containing protein K [Capra hircus]
bta-miR-138	102173853	ITPKA	PREDICTED: inositol-trisphosphate 3-kinase A [Capra hircus]
chi-miR-491-5p_R+1	102173853	ITPKA	PREDICTED: inositol-trisphosphate 3-kinase A [Capra hircus]
chi-miR-29c-5p_L-2R+2	102191231	KANK2	PREDICTED: KN motif and ankyrin repeat domain-containing protein 2 [Capra hircus]
chi-miR-378-5p	102191231	KANK2	PREDICTED: KN motif and ankyrin repeat domain-containing protein 2 [Capra hircus]
ptr-miR-877_R+4	102191231	KANK2	PREDICTED: KN motif and ankyrin repeat domain-containing protein 2 [Capra hircus]
chi-miR-378-5p	102170924	KCNJ9	G protein-activated inward rectifier potassium channel 3 isoform X1 [Bos indicus x Bos taurus]
chi-miR-504_R+1	102170924	KCNJ9	G protein-activated inward rectifier potassium channel 3 isoform X1 [Bos indicus x Bos taurus]
mmu-miR-205-3p	102170924	KCNJ9	G protein-activated inward rectifier potassium channel 3 isoform X1 [Bos indicus x Bos taurus]
ptr-miR-877_R+4	102170924	KCNJ9	G protein-activated inward rectifier potassium channel 3 isoform X1 [Bos indicus x Bos taurus]
chi-miR-27b-3p	102185032	KCTD11	PREDICTED: BTB/POZ domain-containing protein KCTD11 [Ceratotherium simum simum]
chi-miR-491-5p_R+1	102185032	KCTD11	PREDICTED: BTB/POZ domain-containing protein KCTD11 [Ceratotherium simum simum]
oan-miR-27b-3p_R+1	102185032	KCTD11	PREDICTED: BTB/POZ domain-containing protein KCTD11 [Ceratotherium simum simum]
bta-miR-181b_R+2	102187705	KCTD15	PREDICTED: BTB/POZ domain-containing protein KCTD15 [Pantholops hodgsonii]
chi-miR-125a-3p	102187705	KCTD15	PREDICTED: BTB/POZ domain-containing protein KCTD15 [Pantholops hodgsonii]
chi-miR-365-3p	102187705	KCTD15	PREDICTED: BTB/POZ domain-containing protein KCTD15 [Pantholops hodgsonii]
chi-miR-504_R+1	102187705	KCTD15	PREDICTED: BTB/POZ domain-containing protein KCTD15 [Pantholops hodgsonii]
PC-5p-110911_23	102187705	KCTD15	PREDICTED: BTB/POZ domain-containing protein KCTD15 [Pantholops hodgsonii]
chi-miR-20a-3p_R+2	102184670	KCTD6	unnamed protein product, partial [Gulo gulo]
PC-5p-29464_244	102184670	KCTD6	unnamed protein product, partial [Gulo gulo]
ptr-miR-877_R+4	102184670	KCTD6	unnamed protein product, partial [Gulo gulo]
bta-miR-138	102174633	KIF5A	unnamed protein product, partial [Gulo gulo]
bta-miR-2285bd_L+2_1ss10GC	102174633	KIF5A	unnamed protein product, partial [Gulo gulo]
bta-miR-378c	102174633	KIF5A	unnamed protein product, partial [Gulo gulo]
chi-miR-125a-3p	102174633	KIF5A	unnamed protein product, partial [Gulo gulo]
chi-miR-365-3p	102174633	KIF5A	unnamed protein product, partial [Gulo gulo]
chi-miR-455-3p	102174633	KIF5A	unnamed protein product, partial [Gulo gulo]
chi-miR-491-5p_R+1	102174633	KIF5A	unnamed protein product, partial [Gulo gulo]
mmu-mir-1983-p5_1ss1GA	102174633	KIF5A	unnamed protein product, partial [Gulo gulo]
PC-5p-29464_244	102174633	KIF5A	unnamed protein product, partial [Gulo gulo]
ptr-miR-877_R+4	102174633	KIF5A	unnamed protein product, partial [Gulo gulo]
bta-miR-181b_R+2	102173397	LGALSL	PREDICTED: galectin-related protein [Macaca mulatta]
chi-miR-27b-3p	102173397	LGALSL	PREDICTED: galectin-related protein [Macaca mulatta]
chi-miR-378-5p	102173397	LGALSL	PREDICTED: galectin-related protein [Macaca mulatta]
mmu-miR-205-3p	102173397	LGALSL	PREDICTED: galectin-related protein [Macaca mulatta]
oan-miR-27b-3p_R+1	102173397	LGALSL	PREDICTED: galectin-related protein [Macaca mulatta]
chi-miR-27b-3p	102177680	LIMK1	PREDICTED: LIM domain kinase 1 [Capra hircus]
oan-miR-27b-3p_R+1	102177680	LIMK1	PREDICTED: LIM domain kinase 1 [Capra hircus]
mml-miR-210-5p_1ss5CA	102172019	LOC102172019	PREDICTED: translation initiation factor IF-2-like [Capra hircus]
bta-miR-181b_R+2	102184252	LOC102184252	PREDICTED: cytochrome P450 1B1 [Capra hircus]
bta-miR-2285bz_R+1	102184252	LOC102184252	PREDICTED: cytochrome P450 1B1 [Capra hircus]
bta-miR-2285f	102184252	LOC102184252	PREDICTED: cytochrome P450 1B1 [Capra hircus]
chi-miR-27b-3p	102184252	LOC102184252	PREDICTED: cytochrome P450 1B1 [Capra hircus]
hsa-miR-1260a_R+2_1ss9TG	102184252	LOC102184252	PREDICTED: cytochrome P450 1B1 [Capra hircus]
mml-miR-569_L-3_1ss20GC	102184252	LOC102184252	PREDICTED: cytochrome P450 1B1 [Capra hircus]
mmu-mir-1983-p5_1ss1GA	102184252	LOC102184252	PREDICTED: cytochrome P450 1B1 [Capra hircus]
oan-miR-27b-3p_R+1	102184252	LOC102184252	PREDICTED: cytochrome P450 1B1 [Capra hircus]
PC-5p-12897_666	102184252	LOC102184252	PREDICTED: cytochrome P450 1B1 [Capra hircus]
bta-miR-138	108635183	LOC108635183	PREDICTED: LOW QUALITY PROTEIN: ubiquitin carboxyl-terminal hydrolase 33-like, partial [Capra hircus]
bta-miR-181b_R+2	108635183	LOC108635183	PREDICTED: LOW QUALITY PROTEIN: ubiquitin carboxyl-terminal hydrolase 33-like, partial [Capra hircus]
bta-miR-2285bz_R+1	108635183	LOC108635183	PREDICTED: LOW QUALITY PROTEIN: ubiquitin carboxyl-terminal hydrolase 33-like, partial [Capra hircus]
chi-let-7a-3p_1ss22CT	108635183	LOC108635183	PREDICTED: LOW QUALITY PROTEIN: ubiquitin carboxyl-terminal hydrolase 33-like, partial [Capra hircus]
chi-miR-365-3p	108635183	LOC108635183	PREDICTED: LOW QUALITY PROTEIN: ubiquitin carboxyl-terminal hydrolase 33-like, partial [Capra hircus]
mml-miR-210-5p_1ss5CA	108635183	LOC108635183	PREDICTED: LOW QUALITY PROTEIN: ubiquitin carboxyl-terminal hydrolase 33-like, partial [Capra hircus]
bta-miR-181b_R+2	102171839	LRRC4	leucine-rich repeat-containing protein 4 isoform X1 [Bos taurus]
chi-let-7a-3p_1ss22CT	102171839	LRRC4	leucine-rich repeat-containing protein 4 isoform X1 [Bos taurus]
mmu-miR-205-3p	102171839	LRRC4	leucine-rich repeat-containing protein 4 isoform X1 [Bos taurus]
PC-3p-50875_114	102171839	LRRC4	leucine-rich repeat-containing protein 4 isoform X1 [Bos taurus]
PC-5p-110911_23	102171839	LRRC4	leucine-rich repeat-containing protein 4 isoform X1 [Bos taurus]
bta-miR-2285bd_L+2_1ss10GC	102188974	MEIOC	PREDICTED: meiosis-specific coiled-coil domain-containing protein MEIOC [Capra hircus]
mmu-miR-205-3p	102188974	MEIOC	PREDICTED: meiosis-specific coiled-coil domain-containing protein MEIOC [Capra hircus]
oan-miR-27b-3p_R+1	102188974	MEIOC	PREDICTED: meiosis-specific coiled-coil domain-containing protein MEIOC [Capra hircus]
PC-3p-86338_42	102188974	MEIOC	PREDICTED: meiosis-specific coiled-coil domain-containing protein MEIOC [Capra hircus]
PC-5p-131061_14	102188974	MEIOC	PREDICTED: meiosis-specific coiled-coil domain-containing protein MEIOC [Capra hircus]
bta-miR-194b	102173156	MXI1	PREDICTED: max-interacting protein 1 isoform X2 [Capra hircus]
bta-miR-194b-3p_L+1R-2	102173156	MXI1	PREDICTED: max-interacting protein 1 isoform X2 [Capra hircus]
mmu-miR-1983	102173156	MXI1	PREDICTED: max-interacting protein 1 isoform X2 [Capra hircus]
PC-5p-12897_666	102173156	MXI1	PREDICTED: max-interacting protein 1 isoform X2 [Capra hircus]
ptr-miR-877_R+4	102173156	MXI1	PREDICTED: max-interacting protein 1 isoform X2 [Capra hircus]
bta-miR-181b_R+2	102186427	NKPD1	PREDICTED: NTPase KAP family P-loop domain-containing protein 1 isoform X4 [Ovis aries musimon]
bta-miR-378c	102186427	NKPD1	PREDICTED: NTPase KAP family P-loop domain-containing protein 1 isoform X4 [Ovis aries musimon]
chi-miR-29c-5p_L-2R+2	102186427	NKPD1	PREDICTED: NTPase KAP family P-loop domain-containing protein 1 isoform X4 [Ovis aries musimon]
bta-miR-181b_R+2	102185379	PLAG1	PREDICTED: zinc finger protein PLAG1 isoform X2 [Capra hircus]
bta-miR-194b	102185379	PLAG1	PREDICTED: zinc finger protein PLAG1 isoform X2 [Capra hircus]
bta-miR-194b-3p_L+1R-2	102185379	PLAG1	PREDICTED: zinc finger protein PLAG1 isoform X2 [Capra hircus]
bta-miR-2285f	102185379	PLAG1	PREDICTED: zinc finger protein PLAG1 isoform X2 [Capra hircus]
bta-miR-378c	102185379	PLAG1	PREDICTED: zinc finger protein PLAG1 isoform X2 [Capra hircus]
chi-let-7a-3p_1ss22CT	102185379	PLAG1	PREDICTED: zinc finger protein PLAG1 isoform X2 [Capra hircus]
chi-miR-125a-3p	102185379	PLAG1	PREDICTED: zinc finger protein PLAG1 isoform X2 [Capra hircus]
chi-miR-141_R+1	102185379	PLAG1	PREDICTED: zinc finger protein PLAG1 isoform X2 [Capra hircus]
mml-miR-569_L-3_1ss20GC	102185379	PLAG1	PREDICTED: zinc finger protein PLAG1 isoform X2 [Capra hircus]
mmu-miR-1983	102185379	PLAG1	PREDICTED: zinc finger protein PLAG1 isoform X2 [Capra hircus]
bta-miR-2285bd_L+2_1ss10GC	102178972	PLCE1	PREDICTED: 1-phosphatidylinositol 4,5-bisphosphate phosphodiesterase epsilon-1 isoform X2 [Capra hircus]
chi-miR-20a-3p_R+2	102178972	PLCE1	PREDICTED: 1-phosphatidylinositol 4,5-bisphosphate phosphodiesterase epsilon-1 isoform X2 [Capra hircus]
chi-miR-365-3p	102178972	PLCE1	PREDICTED: 1-phosphatidylinositol 4,5-bisphosphate phosphodiesterase epsilon-1 isoform X2 [Capra hircus]
mmu-miR-1983	102178972	PLCE1	PREDICTED: 1-phosphatidylinositol 4,5-bisphosphate phosphodiesterase epsilon-1 isoform X2 [Capra hircus]
PC-5p-19612_402	102178972	PLCE1	PREDICTED: 1-phosphatidylinositol 4,5-bisphosphate phosphodiesterase epsilon-1 isoform X2 [Capra hircus]
PC-5p-29464_244	102178972	PLCE1	PREDICTED: 1-phosphatidylinositol 4,5-bisphosphate phosphodiesterase epsilon-1 isoform X2 [Capra hircus]
ptr-miR-877_R+4	102178972	PLCE1	PREDICTED: 1-phosphatidylinositol 4,5-bisphosphate phosphodiesterase epsilon-1 isoform X2 [Capra hircus]
bta-miR-181b_R+2	102183272	PLCL2	PREDICTED: inactive phospholipase C-like protein 2 isoform X2 [Capra hircus]
chi-let-7g-3p_1ss22CT	102183272	PLCL2	PREDICTED: inactive phospholipase C-like protein 2 isoform X2 [Capra hircus]
chi-miR-27b-3p	102183272	PLCL2	PREDICTED: inactive phospholipase C-like protein 2 isoform X2 [Capra hircus]
chi-miR-455-3p	102183272	PLCL2	PREDICTED: inactive phospholipase C-like protein 2 isoform X2 [Capra hircus]
mml-miR-210-5p_1ss5CA	102183272	PLCL2	PREDICTED: inactive phospholipase C-like protein 2 isoform X2 [Capra hircus]
oan-miR-27b-3p_R+1	102183272	PLCL2	PREDICTED: inactive phospholipase C-like protein 2 isoform X2 [Capra hircus]
PC-3p-53833_104	102183272	PLCL2	PREDICTED: inactive phospholipase C-like protein 2 isoform X2 [Capra hircus]
chi-miR-194	102188601	PLEKHH2	PREDICTED: pleckstrin homology domain-containing family H member 2 [Capra hircus]
bta-miR-194b	102172686	PPP1R3C	PPP1R3C, partial [Cervus elaphus hippelaphus]
bta-miR-194b-3p_L+1R-2	102172686	PPP1R3C	PPP1R3C, partial [Cervus elaphus hippelaphus]
bta-miR-2285f	102172686	PPP1R3C	PPP1R3C, partial [Cervus elaphus hippelaphus]
chi-miR-194	102172686	PPP1R3C	PPP1R3C, partial [Cervus elaphus hippelaphus]
chi-miR-20a-3p_R+2	102172686	PPP1R3C	PPP1R3C, partial [Cervus elaphus hippelaphus]
chi-miR-455-3p	102172686	PPP1R3C	PPP1R3C, partial [Cervus elaphus hippelaphus]
PC-5p-29464_244	102172686	PPP1R3C	PPP1R3C, partial [Cervus elaphus hippelaphus]
chi-miR-455-3p	102172562	PRR5L	proline-rich protein 5-like isoform X1 [Bos taurus]
chi-miR-491-5p_R+1	102191098	PRRT2	PREDICTED: proline-rich transmembrane protein 2 [Capra hircus]
bta-miR-138	100860905	PTGS2	PREDICTED: prostaglandin G/H synthase 2 [Capra hircus]
bta-miR-194b	100860905	PTGS2	PREDICTED: prostaglandin G/H synthase 2 [Capra hircus]
bta-miR-194b-3p_L+1R-2	100860905	PTGS2	PREDICTED: prostaglandin G/H synthase 2 [Capra hircus]
bta-miR-2285bz_R+1	100860905	PTGS2	PREDICTED: prostaglandin G/H synthase 2 [Capra hircus]
chi-let-7g-3p_1ss22CT	100860905	PTGS2	PREDICTED: prostaglandin G/H synthase 2 [Capra hircus]
chi-miR-455-3p	102182806	PTK6	PREDICTED: protein-tyrosine kinase 6 [Capra hircus]
chi-miR-504_R+1	102182806	PTK6	PREDICTED: protein-tyrosine kinase 6 [Capra hircus]
bta-miR-181b_R+2	100861132	RAB30	ras-related protein Rab-30 isoform X1 [Vombatus ursinus]
bta-miR-194b	100861132	RAB30	ras-related protein Rab-30 isoform X1 [Vombatus ursinus]
bta-miR-194b-3p_L+1R-2	100861132	RAB30	ras-related protein Rab-30 isoform X1 [Vombatus ursinus]
bta-miR-2285bz_R+1	100861132	RAB30	ras-related protein Rab-30 isoform X1 [Vombatus ursinus]
chi-let-7g-3p_1ss22CT	100861132	RAB30	ras-related protein Rab-30 isoform X1 [Vombatus ursinus]
chi-miR-365-3p	100861132	RAB30	ras-related protein Rab-30 isoform X1 [Vombatus ursinus]
chi-miR-378-5p	100861132	RAB30	ras-related protein Rab-30 isoform X1 [Vombatus ursinus]
chi-miR-455-3p	100861132	RAB30	ras-related protein Rab-30 isoform X1 [Vombatus ursinus]
mml-miR-210-5p_1ss5CA	100861132	RAB30	ras-related protein Rab-30 isoform X1 [Vombatus ursinus]
mmu-miR-205-3p	100861132	RAB30	ras-related protein Rab-30 isoform X1 [Vombatus ursinus]
PC-3p-50875_114	100861132	RAB30	ras-related protein Rab-30 isoform X1 [Vombatus ursinus]
PC-3p-86338_42	100861132	RAB30	ras-related protein Rab-30 isoform X1 [Vombatus ursinus]
PC-5p-12897_666	100861132	RAB30	ras-related protein Rab-30 isoform X1 [Vombatus ursinus]
PC-5p-131061_14	100861132	RAB30	ras-related protein Rab-30 isoform X1 [Vombatus ursinus]
PC-5p-19612_402	100861132	RAB30	ras-related protein Rab-30 isoform X1 [Vombatus ursinus]
bta-miR-2285f	102189974	RAB39A	ras-related protein Rab-39A [Bos taurus]
mmu-miR-205-3p	102189974	RAB39A	ras-related protein Rab-39A [Bos taurus]
bta-miR-2285bd_L+2_1ss10GC	102182306	RFX3	PREDICTED: transcription factor RFX3 isoform X2 [Ovis aries musimon]
chi-let-7a-3p_1ss22CT	102182306	RFX3	PREDICTED: transcription factor RFX3 isoform X2 [Ovis aries musimon]
chi-let-7g-3p_1ss22CT	102182306	RFX3	PREDICTED: transcription factor RFX3 isoform X2 [Ovis aries musimon]
chi-miR-27b-3p	102182306	RFX3	PREDICTED: transcription factor RFX3 isoform X2 [Ovis aries musimon]
chi-miR-455-3p	102182306	RFX3	PREDICTED: transcription factor RFX3 isoform X2 [Ovis aries musimon]
mmu-miR-205-3p	102182306	RFX3	PREDICTED: transcription factor RFX3 isoform X2 [Ovis aries musimon]
oan-miR-27b-3p_R+1	102182306	RFX3	PREDICTED: transcription factor RFX3 isoform X2 [Ovis aries musimon]
PC-5p-131061_14	102182306	RFX3	PREDICTED: transcription factor RFX3 isoform X2 [Ovis aries musimon]
bta-miR-138	102168443	RGL3	PREDICTED: ral guanine nucleotide dissociation stimulator-like 3 isoform X3 [Capra hircus]
bta-miR-138	102183457	RGMA	PREDICTED: repulsive guidance molecule A [Capra hircus]
chi-miR-491-5p_R+1	102183457	RGMA	PREDICTED: repulsive guidance molecule A [Capra hircus]
PC-5p-110911_23	102183457	RGMA	PREDICTED: repulsive guidance molecule A [Capra hircus]
bta-miR-181b_R+2	102173434	RHBDL1	PREDICTED: rhomboid-related protein 1 [Capra hircus]
bta-miR-378c	102173434	RHBDL1	PREDICTED: rhomboid-related protein 1 [Capra hircus]
bta-miR-181b_R+2	102189403	SALL2	PREDICTED: sal-like protein 2 isoform X4 [Capra hircus]
PC-5p-48517_123	102189403	SALL2	PREDICTED: sal-like protein 2 isoform X4 [Capra hircus]
hsa-miR-1260a_R+2_1ss9TG	102171324	SEMA6B	PREDICTED: semaphorin-6B isoform X1 [Capra hircus]
mml-miR-210-5p_1ss5CA	102171324	SEMA6B	PREDICTED: semaphorin-6B isoform X1 [Capra hircus]
bta-miR-138	102190298	SLC38A4	PREDICTED: sodium-coupled neutral amino acid transporter 4 [Capra hircus]
bta-miR-181b_R+2	102190298	SLC38A4	PREDICTED: sodium-coupled neutral amino acid transporter 4 [Capra hircus]
bta-miR-2285f	102190298	SLC38A4	PREDICTED: sodium-coupled neutral amino acid transporter 4 [Capra hircus]
chi-miR-141_R+1	102190298	SLC38A4	PREDICTED: sodium-coupled neutral amino acid transporter 4 [Capra hircus]
chi-miR-27b-3p	102190298	SLC38A4	PREDICTED: sodium-coupled neutral amino acid transporter 4 [Capra hircus]
oan-miR-27b-3p_R+1	102190298	SLC38A4	PREDICTED: sodium-coupled neutral amino acid transporter 4 [Capra hircus]
chi-miR-491-5p_R+1	102170104	SLC9A3R2	PREDICTED: Na(+)/H(+) exchange regulatory cofactor NHE-RF2 isoform X5 [Ovis aries musimon]
bta-miR-2285bd_L+2_1ss10GC	102181596	SPAG8	PREDICTED: sperm-associated antigen 8 isoform X3 [Capra hircus]
PC-3p-86338_42	102181596	SPAG8	PREDICTED: sperm-associated antigen 8 isoform X3 [Capra hircus]
chi-miR-491-5p_R+1	102188225	SPTB	PREDICTED: LOW QUALITY PROTEIN: spectrin beta chain, erythrocytic [Capra hircus]
PC-5p-110911_23	102188225	SPTB	PREDICTED: LOW QUALITY PROTEIN: spectrin beta chain, erythrocytic [Capra hircus]
bta-miR-181b_R+2	102183843	SRL	sarcalumenin isoform X2 [Bos taurus]
chi-let-7b-5p	102183843	SRL	sarcalumenin isoform X2 [Bos taurus]
chi-miR-27b-3p	102183843	SRL	sarcalumenin isoform X2 [Bos taurus]
chi-miR-378-5p	102183843	SRL	sarcalumenin isoform X2 [Bos taurus]
oan-miR-27b-3p_R+1	102183843	SRL	sarcalumenin isoform X2 [Bos taurus]
bta-miR-2285bd_L+2_1ss10GC	102171331	SRSF6	unnamed protein product, partial [Gulo gulo]
bta-miR-181b_R+2	102179386	STC1	stanniocalcin-1 isoform X1 [Eumetopias jubatus]
bta-miR-194b	102179386	STC1	stanniocalcin-1 isoform X1 [Eumetopias jubatus]
bta-miR-194b-3p_L+1R-2	102179386	STC1	stanniocalcin-1 isoform X1 [Eumetopias jubatus]
bta-miR-378c	102179386	STC1	stanniocalcin-1 isoform X1 [Eumetopias jubatus]
chi-miR-491-5p_R+1	102179386	STC1	stanniocalcin-1 isoform X1 [Eumetopias jubatus]
chi-miR-504_R+1	102179386	STC1	stanniocalcin-1 isoform X1 [Eumetopias jubatus]
chi-miR-194	102191082	STC2	PREDICTED: stanniocalcin-2 [Capra hircus]
mmu-miR-1983	102191082	STC2	PREDICTED: stanniocalcin-2 [Capra hircus]
mmu-miR-205-3p	102191082	STC2	PREDICTED: stanniocalcin-2 [Capra hircus]
bta-miR-181b_R+2	102186419	TARDBP	TAR DNA-binding protein 43 [Tupaia chinensis]
chi-miR-194	102186419	TARDBP	TAR DNA-binding protein 43 [Tupaia chinensis]
chi-miR-455-3p	102186419	TARDBP	TAR DNA-binding protein 43 [Tupaia chinensis]
hsa-miR-1260a_R+2_1ss9TG	102186419	TARDBP	TAR DNA-binding protein 43 [Tupaia chinensis]
mmu-mir-1983-p5_1ss1GA	102186419	TARDBP	TAR DNA-binding protein 43 [Tupaia chinensis]
chi-miR-27b-3p	102174774	THAP8	THAP domain-containing protein 8 isoform X1 [Odocoileus virginianus texanus]
oan-miR-27b-3p_R+1	102174774	THAP8	THAP domain-containing protein 8 isoform X1 [Odocoileus virginianus texanus]
bta-miR-138	102177287	TMEM37	PREDICTED: voltage-dependent calcium channel gamma-like subunit [Capra hircus]
mml-miR-210-5p_1ss5CA	102191637	TNFRSF18	PREDICTED: tumor necrosis factor receptor superfamily member 18 isoform X2 [Capra hircus]
chi-miR-27b-3p	102185041	TPPP	tubulin polymerization-promoting protein isoform X1 [Bos taurus]
hsa-miR-1260a_R+2_1ss9TG	102185041	TPPP	tubulin polymerization-promoting protein isoform X1 [Bos taurus]
mml-miR-210-5p_1ss5CA	102185041	TPPP	tubulin polymerization-promoting protein isoform X1 [Bos taurus]
oan-miR-27b-3p_R+1	102185041	TPPP	tubulin polymerization-promoting protein isoform X1 [Bos taurus]
bta-miR-194b	102179902	TRIM45	PREDICTED: tripartite motif-containing protein 45 [Capra hircus]
bta-miR-194b-3p_L+1R-2	102179902	TRIM45	PREDICTED: tripartite motif-containing protein 45 [Capra hircus]
bta-miR-378c	102179902	TRIM45	PREDICTED: tripartite motif-containing protein 45 [Capra hircus]
chi-let-7g-3p_1ss22CT	102179902	TRIM45	PREDICTED: tripartite motif-containing protein 45 [Capra hircus]
mmu-mir-1983-p5_1ss1GA	102179902	TRIM45	PREDICTED: tripartite motif-containing protein 45 [Capra hircus]
chi-let-7a-3p_1ss22CT	102189645	VAV3	guanine nucleotide exchange factor VAV3 isoform X2 [Bos indicus x Bos taurus]
chi-let-7b-5p	102189645	VAV3	guanine nucleotide exchange factor VAV3 isoform X2 [Bos indicus x Bos taurus]
chi-let-7g-3p_1ss22CT	102189645	VAV3	guanine nucleotide exchange factor VAV3 isoform X2 [Bos indicus x Bos taurus]
chi-miR-141_R+1	102189645	VAV3	guanine nucleotide exchange factor VAV3 isoform X2 [Bos indicus x Bos taurus]
chi-miR-194	102189645	VAV3	guanine nucleotide exchange factor VAV3 isoform X2 [Bos indicus x Bos taurus]
chi-miR-27b-3p	102189645	VAV3	guanine nucleotide exchange factor VAV3 isoform X2 [Bos indicus x Bos taurus]
hsa-miR-1260a_R+2_1ss9TG	102189645	VAV3	guanine nucleotide exchange factor VAV3 isoform X2 [Bos indicus x Bos taurus]
mmu-miR-205-3p	102189645	VAV3	guanine nucleotide exchange factor VAV3 isoform X2 [Bos indicus x Bos taurus]
oan-miR-27b-3p_R+1	102189645	VAV3	guanine nucleotide exchange factor VAV3 isoform X2 [Bos indicus x Bos taurus]
bta-miR-194b	102177522	VLDLR	PREDICTED: very low-density lipoprotein receptor isoform X2 [Rhinopithecus roxellana]
bta-miR-194b-3p_L+1R-2	102177522	VLDLR	PREDICTED: very low-density lipoprotein receptor isoform X2 [Rhinopithecus roxellana]
bta-miR-378c	102177522	VLDLR	PREDICTED: very low-density lipoprotein receptor isoform X2 [Rhinopithecus roxellana]
chi-let-7a-3p_1ss22CT	102177522	VLDLR	PREDICTED: very low-density lipoprotein receptor isoform X2 [Rhinopithecus roxellana]
chi-miR-365-3p	102177522	VLDLR	PREDICTED: very low-density lipoprotein receptor isoform X2 [Rhinopithecus roxellana]
mmu-miR-1983	102177522	VLDLR	PREDICTED: very low-density lipoprotein receptor isoform X2 [Rhinopithecus roxellana]
PC-3p-50875_114	102177522	VLDLR	PREDICTED: very low-density lipoprotein receptor isoform X2 [Rhinopithecus roxellana]
PC-5p-131061_14	102177522	VLDLR	PREDICTED: very low-density lipoprotein receptor isoform X2 [Rhinopithecus roxellana]
mml-miR-210-5p_1ss5CA	102179344	VPS37D	vacuolar protein sorting-associated protein 37D [Lagenorhynchus obliquidens]
PC-5p-110911_23	102184280	WNK4	PREDICTED: serine/threonine-protein kinase WNK4 isoform X3 [Capra hircus]
bta-miR-138	102184896	WNT9A	PREDICTED: protein Wnt-9a isoform X2 [Ovis aries musimon]
chi-let-7b-5p	102184896	WNT9A	PREDICTED: protein Wnt-9a isoform X2 [Ovis aries musimon]
chi-let-7g-3p_1ss22CT	102184896	WNT9A	PREDICTED: protein Wnt-9a isoform X2 [Ovis aries musimon]
mmu-mir-1983-p5_1ss1GA	102184896	WNT9A	PREDICTED: protein Wnt-9a isoform X2 [Ovis aries musimon]
PC-5p-12897_666	102184896	WNT9A	PREDICTED: protein Wnt-9a isoform X2 [Ovis aries musimon]
chi-miR-141_R+1	102189791	YPEL2	protein yippee-like 2 [Patagioenas fasciata monilis]
chi-miR-194	102189791	YPEL2	protein yippee-like 2 [Patagioenas fasciata monilis]
chi-miR-27b-3p	102189791	YPEL2	protein yippee-like 2 [Patagioenas fasciata monilis]
mmu-miR-205-3p	102189791	YPEL2	protein yippee-like 2 [Patagioenas fasciata monilis]
oan-miR-27b-3p_R+1	102189791	YPEL2	protein yippee-like 2 [Patagioenas fasciata monilis]
PC-5p-48517_123	102189791	YPEL2	protein yippee-like 2 [Patagioenas fasciata monilis]
bta-miR-138	102182155	YPEL4	protein yippee-like 4 [Cavia porcellus]
mmu-miR-1983	102182155	YPEL4	protein yippee-like 4 [Cavia porcellus]
bta-miR-378c	102178726	ZNF395	PREDICTED: zinc finger protein 395 isoform X2 [Capra hircus]
chi-miR-194	102178726	ZNF395	PREDICTED: zinc finger protein 395 isoform X2 [Capra hircus]
chi-miR-491-5p_R+1	102178726	ZNF395	PREDICTED: zinc finger protein 395 isoform X2 [Capra hircus]
hsa-miR-1260a_R+2_1ss9TG	102178726	ZNF395	PREDICTED: zinc finger protein 395 isoform X2 [Capra hircus]
mmu-miR-205-3p	102186607	ZNF438	PREDICTED: zinc finger protein 438 [Capra hircus]
chi-miR-504_R+1	106502052	ZNF775	zinc finger protein 775 isoform X1 [Ovis aries]
hsa-miR-1260a_R+2_1ss9TG	106502052	ZNF775	zinc finger protein 775 isoform X1 [Ovis aries]
