# Supplementary material for: The mRNA and miRNA profiles of goat bronchial epithelial cells stimulated by Pasteurella multocida strains of serotype A and D
Source: PeerJ. 2022 Mar 18;10:e13047. doi: 10.7717/peerj.13047 (PMC8935994; doi:10.7717/peerj.13047)
Supplement: Table S7 [file peerj-10-13047-s007.xlsx]

## Sheet: Ctrl vs D_T4h
Prediction of miRNA target genes in the P. multocida strain serotype D- stimulated group
miRNA ID	Gene ID	Symbol	Gene Annoation
chi-miR-17-3p_R-3	102185060	C27H8orf4	protein C8orf4 homolog [Canis lupus familiaris]
mmu-mir-6236-p5_7	102185060	C27H8orf4	protein C8orf4 homolog [Canis lupus familiaris]
oan-miR-1386_1ss18AT	102185060	C27H8orf4	protein C8orf4 homolog [Canis lupus familiaris]
mmu-mir-6236-p5_7	102189824	FAM45A	protein FAM45A isoform X4 [Microcebus murinus]
PC-3p-4951_2010	102189824	FAM45A	protein FAM45A isoform X4 [Microcebus murinus]
PC-3p-9125_1006	102189824	FAM45A	protein FAM45A isoform X4 [Microcebus murinus]
bta-miR-2285at_L+1_1ss17TC	102185574	FBXO41	TPA: F-box protein 41-like [Bos taurus]
chi-miR-1343_R-1	102185574	FBXO41	TPA: F-box protein 41-like [Bos taurus]
chi-miR-30b-3p	102185574	FBXO41	TPA: F-box protein 41-like [Bos taurus]
hsa-miR-6529-3p_1ss15TC	102185574	FBXO41	TPA: F-box protein 41-like [Bos taurus]
PC-3p-19195_413	102185574	FBXO41	TPA: F-box protein 41-like [Bos taurus]
chi-miR-130b-5p	102183734	GCG	PREDICTED: glucagon [Hipposideros armiger]
PC-5p-24097_314	102188889	HPN	serine protease hepsin isoform X1 [Delphinapterus leucas]
chi-miR-1343_R-1	102186826	KCNIP2	PREDICTED: Kv channel-interacting protein 2 isoform X9 [Capra hircus]
chi-miR-30b-3p	102186826	KCNIP2	PREDICTED: Kv channel-interacting protein 2 isoform X9 [Capra hircus]
chi-miR-378-3p	102186826	KCNIP2	PREDICTED: Kv channel-interacting protein 2 isoform X9 [Capra hircus]
chi-miR-125a-5p_R+2	108633896	KCTD7	rab5 GDP/GTP exchange factor isoform X8 [Bubalus bubalis]
chi-miR-378-3p	108633896	KCTD7	rab5 GDP/GTP exchange factor isoform X8 [Bubalus bubalis]
PC-3p-11664_749	108633896	KCTD7	rab5 GDP/GTP exchange factor isoform X8 [Bubalus bubalis]
PC-3p-4951_2010	108633896	KCTD7	rab5 GDP/GTP exchange factor isoform X8 [Bubalus bubalis]
PC-3p-9125_1006	108633896	KCTD7	rab5 GDP/GTP exchange factor isoform X8 [Bubalus bubalis]
bta-miR-2285b	102173827	LOC102173827	PREDICTED: sex comb on midleg-like protein 1 isoform X2 [Ovis aries musimon]
chi-miR-378-3p	102173827	LOC102173827	PREDICTED: sex comb on midleg-like protein 1 isoform X2 [Ovis aries musimon]
mmu-mir-6236-p5_7	102173827	LOC102173827	PREDICTED: sex comb on midleg-like protein 1 isoform X2 [Ovis aries musimon]
PC-3p-4951_2010	102173827	LOC102173827	PREDICTED: sex comb on midleg-like protein 1 isoform X2 [Ovis aries musimon]
PC-3p-9125_1006	102173827	LOC102173827	PREDICTED: sex comb on midleg-like protein 1 isoform X2 [Ovis aries musimon]
chi-miR-130b-5p	102181811	LOC102181811	PREDICTED: multidrug resistance-associated protein 1 isoform X2 [Capra hircus]
PC-3p-11664_749	102181811	LOC102181811	PREDICTED: multidrug resistance-associated protein 1 isoform X2 [Capra hircus]
chi-miR-30b-3p	102184859	LOC102184859	PREDICTED: low affinity immunoglobulin gamma Fc region receptor II isoform X2 [Capra hircus]
chi-miR-542-3p_R+2	102184859	LOC102184859	PREDICTED: low affinity immunoglobulin gamma Fc region receptor II isoform X2 [Capra hircus]
hsa-miR-6529-3p_1ss15TC	102184859	LOC102184859	PREDICTED: low affinity immunoglobulin gamma Fc region receptor II isoform X2 [Capra hircus]
PC-3p-38365_173	108633772	LOC108633772	PREDICTED: translation initiation factor IF-2-like [Capra hircus]
bta-miR-2285k_L-1R+1_2	108635459	LOC108635459	PREDICTED: NKG2D ligand 3-like isoform X2 [Capra hircus]
chi-miR-1343_R-1	108635459	LOC108635459	PREDICTED: NKG2D ligand 3-like isoform X2 [Capra hircus]
PC-3p-38365_173	108635459	LOC108635459	PREDICTED: NKG2D ligand 3-like isoform X2 [Capra hircus]
chi-miR-30b-3p	108638507	LOC108638507	PREDICTED: interferon alpha-inducible protein 27-like protein 2A [Capra hircus]
bta-miR-2285at_L+1_1ss17TC	102185444	MBNL3	PREDICTED: muscleblind-like protein 3 isoform X6 [Capra hircus]
bta-miR-2285b	102185444	MBNL3	PREDICTED: muscleblind-like protein 3 isoform X6 [Capra hircus]
chi-miR-125a-5p_R+2	102185444	MBNL3	PREDICTED: muscleblind-like protein 3 isoform X6 [Capra hircus]
chi-miR-15a-3p_1ss22AT	102185444	MBNL3	PREDICTED: muscleblind-like protein 3 isoform X6 [Capra hircus]
mmu-mir-6236-p3_1	102185444	MBNL3	PREDICTED: muscleblind-like protein 3 isoform X6 [Capra hircus]
mmu-mir-6236-p3_2	102185444	MBNL3	PREDICTED: muscleblind-like protein 3 isoform X6 [Capra hircus]
mmu-mir-6236-p5_1	102185444	MBNL3	PREDICTED: muscleblind-like protein 3 isoform X6 [Capra hircus]
PC-3p-114965_21	102185444	MBNL3	PREDICTED: muscleblind-like protein 3 isoform X6 [Capra hircus]
PC-3p-38365_173	102185444	MBNL3	PREDICTED: muscleblind-like protein 3 isoform X6 [Capra hircus]
PC-3p-4951_2010	102185444	MBNL3	PREDICTED: muscleblind-like protein 3 isoform X6 [Capra hircus]
PC-3p-9125_1006	102185444	MBNL3	PREDICTED: muscleblind-like protein 3 isoform X6 [Capra hircus]
ssc-miR-146a-3p_1ss20CT	102185444	MBNL3	PREDICTED: muscleblind-like protein 3 isoform X6 [Capra hircus]
chi-miR-30b-3p	102173284	NOXA1	PREDICTED: NADPH oxidase activator 1 isoform X8 [Capra hircus]
chi-miR-130b-5p	102185139	PHKG1	PREDICTED: phosphorylase b kinase gamma catalytic chain, skeletal muscle/heart isoform [Capra hircus]
chi-miR-1343_R-1	102185139	PHKG1	PREDICTED: phosphorylase b kinase gamma catalytic chain, skeletal muscle/heart isoform [Capra hircus]
bta-miR-2285b	102170348	RHOF	PREDICTED: rho-related GTP-binding protein RhoF [Capra hircus]
chi-miR-130b-5p	102170348	RHOF	PREDICTED: rho-related GTP-binding protein RhoF [Capra hircus]
chi-miR-1343_R-1	102170348	RHOF	PREDICTED: rho-related GTP-binding protein RhoF [Capra hircus]
chi-miR-378-3p	102170348	RHOF	PREDICTED: rho-related GTP-binding protein RhoF [Capra hircus]
bta-miR-2285at_L+1_1ss17TC	102174396	SCAMP1	PREDICTED: secretory carrier-associated membrane protein 1 isoform X4 [Bos mutus]
chi-miR-542-3p_R+2	102174396	SCAMP1	PREDICTED: secretory carrier-associated membrane protein 1 isoform X4 [Bos mutus]
mmu-mir-6236-p5_7	102174396	SCAMP1	PREDICTED: secretory carrier-associated membrane protein 1 isoform X4 [Bos mutus]
PC-3p-114965_21	102174396	SCAMP1	PREDICTED: secretory carrier-associated membrane protein 1 isoform X4 [Bos mutus]
PC-3p-11664_749	102174396	SCAMP1	PREDICTED: secretory carrier-associated membrane protein 1 isoform X4 [Bos mutus]
PC-3p-38365_173	102174396	SCAMP1	PREDICTED: secretory carrier-associated membrane protein 1 isoform X4 [Bos mutus]
chi-miR-125a-5p_R+2	108633289	SLC25A53	PREDICTED: solute carrier family 25 member 53 isoform X1 [Ovis aries musimon]
chi-miR-1343_R-1	108633289	SLC25A53	PREDICTED: solute carrier family 25 member 53 isoform X1 [Ovis aries musimon]
PC-3p-38365_173	108633289	SLC25A53	PREDICTED: solute carrier family 25 member 53 isoform X1 [Ovis aries musimon]
chi-miR-125a-5p_R+2	102186982	TMEM52	transmembrane protein 52 isoform X1 [Ovis aries]
chi-miR-1343_R-1	102186982	TMEM52	transmembrane protein 52 isoform X1 [Ovis aries]
chi-miR-30b-3p	102186982	TMEM52	transmembrane protein 52 isoform X1 [Ovis aries]
chi-miR-17-3p_R-3	102183379	TXNIP	PREDICTED: thioredoxin-interacting protein [Capra hircus]
PC-3p-11664_749	102183379	TXNIP	PREDICTED: thioredoxin-interacting protein [Capra hircus]
ssc-miR-146a-3p_1ss20CT	102183379	TXNIP	PREDICTED: thioredoxin-interacting protein [Capra hircus]
bta-miR-2285at_L+1_1ss17TC	102172817	UBXN2A	PREDICTED: UBX domain-containing protein 2A isoform X2 [Capra hircus]
bta-miR-2285b	102172817	UBXN2A	PREDICTED: UBX domain-containing protein 2A isoform X2 [Capra hircus]
bta-mir-2285n-5-p3	102172817	UBXN2A	PREDICTED: UBX domain-containing protein 2A isoform X2 [Capra hircus]
chi-miR-125a-5p_R+2	102172817	UBXN2A	PREDICTED: UBX domain-containing protein 2A isoform X2 [Capra hircus]
mmu-mir-6236-p5_7	102172817	UBXN2A	PREDICTED: UBX domain-containing protein 2A isoform X2 [Capra hircus]
PC-3p-38365_173	102172817	UBXN2A	PREDICTED: UBX domain-containing protein 2A isoform X2 [Capra hircus]
PC-3p-4951_2010	102172817	UBXN2A	PREDICTED: UBX domain-containing protein 2A isoform X2 [Capra hircus]
PC-3p-9125_1006	102172817	UBXN2A	PREDICTED: UBX domain-containing protein 2A isoform X2 [Capra hircus]
oan-miR-1386_1ss18AT	102183468	XKR8	PREDICTED: XK-related protein 8 [Capra hircus]
PC-3p-11664_749	102191672	ZNF518A	PREDICTED: zinc finger protein 518A [Capra hircus]
PC-3p-4951_2010	102191672	ZNF518A	PREDICTED: zinc finger protein 518A [Capra hircus]
PC-3p-9125_1006	102191672	ZNF518A	PREDICTED: zinc finger protein 518A [Capra hircus]
chi-miR-17-3p_R-3	102184316	ZNF641	TPA: zinc finger protein 286-like [Bos taurus]
