# Supplementary material for: The mRNA and miRNA profiles of goat bronchial epithelial cells stimulated by Pasteurella multocida strains of serotype A and D
Source: PeerJ. 2022 Mar 18;10:e13047. doi: 10.7717/peerj.13047 (PMC8935994; doi:10.7717/peerj.13047)
Supplement: Table S8 [file peerj-10-13047-s008.xlsx]

## Sheet: Sheet1
GO enrichment analysis of specific differentially expressed genes in the P. multocida strain serotype A- stimulated group
GO_ID	GO_Term	GO_function	GO_class	p-value	Gene_ID	Gene_name
GO:0005179	hormone activity	molecular_function	7	1.61608e-05	100860907;102178091;102179386;102181435;102188120;102191082;	PTHLH;ADM;STC1;THPO;APLN;STC2;
GO:0001656	metanephros development	biological_process	7	2.31462e-05	102177693;102178142;106501749;	HOXC11;GLI3;FOXC2;
GO:0005737	cytoplasm	cellular_component	5	0.000161188	100860905;100861074;102169571;102171839;102173156;102174633;102176547;102177651;102177680;102177693;102178091;102178227;102178403;102178709;102178726;102179386;102179524;102179902;102180118;102180469;102181330;102181596;102182548;102182806;102182992;102185032;102185041;102185425;102185801;102185968;102186607;102187159;102187803;102188250;102188440;102188974;102189645;102191231;106503773;	PTGS2;ANKRD37;CPEB2;LRRC4;MXI1;KIF5A;GLTP;FHOD1;LIMK1;HOXC11;ADM;CDC42SE1;DAG1;BRSK2;ZNF395;STC1;EGLN3;TRIM45;CAPS;TRIOBP;GAPDHS;SPAG8;KLHDC8B;PTK6;DFFB;KCTD11;TPPP;FOXO6;GJB3;DCUN1D3;ZNF438;DNAAF3;DLG4;ADAP2;FZD2;MEIOC;VAV3;KANK2;IRF7;
GO:0007612	learning	biological_process	5	0.000211996	102187803	DLG4
GO:0007613	memory	biological_process	5	0.000285621	102177522;102185425;	VLDLR;FOXO6;
GO:0061041	regulation of wound healing	biological_process	8	0.000357209	102171331;102184427;	SRSF6;LOC102184427;
GO:0008017	microtubule binding	molecular_function	7	0.000548999	102168471;102174633;102178326;102181596;102185041;	NDRG1;KIF5A;JAKMIP3;SPAG8;TPPP;
GO:0060501	positive regulation of epithelial cell proliferation involved in lung morphogenesis	biological_process	9	0.000883909	102171331;102184427;	SRSF6;LOC102184427;
GO:0045785	positive regulation of cell adhesion	biological_process	6	0.00117854	102189645;102190818;102191637;	VAV3;TMEM102;TNFRSF18;
GO:0010837	regulation of keratinocyte proliferation	biological_process	8	0.00123115	102171331;102184427;	SRSF6;LOC102184427;
GO:0030182	neuron differentiation	biological_process	6	0.00147144	102176310;102178709;102184896;	WNT5B;BRSK2;WNT9A;
GO:0036002	pre-mRNA binding	molecular_function	7	0.00163315	102171331;102184427;	SRSF6;LOC102184427;
GO:0045617	negative regulation of keratinocyte differentiation	biological_process	10	0.00208904	102171331;102184427;	SRSF6;LOC102184427;
GO:0007507	heart development	biological_process	6	0.00239936	102177522;102178091;102178142;102187159;102188250;	VLDLR;ADM;GLI3;DNAAF3;ADAP2;
GO:0060070	canonical Wnt signaling pathway	biological_process	8	0.00279385	102178101;102184896;102188440;	LOC102178101;WNT9A;FZD2;
GO:0001077	transcriptional activator activity, RNA polymerase II core promoter proximal region sequence-specific binding	molecular_function	NA	0.00313393	102171737;102177693;102180913;102185379;106501749;	ETV2;HOXC11;PITX3;PLAG1;FOXC2;
GO:0048514	blood vessel morphogenesis	biological_process	6	0.00377164	102169974;102171737;	EFNB2;ETV2;
GO:0001664	G-protein coupled receptor binding	molecular_function	6	0.00424769	102188120;108635183;	APLN;LOC108635183;
GO:0007411	axon guidance	biological_process	6	0.00466778	102169974;102174633;102178126;102178142;108635183;	EFNB2;KIF5A;EFNA4;GLI3;LOC108635183;
GO:0006171	cAMP biosynthetic process	biological_process	12	0.00514748	102178091;102185858;	ADM;ADCY7;
GO:0032331	negative regulation of chondrocyte differentiation	biological_process	8	0.00514748	100860907;102184896;	PTHLH;WNT9A;
GO:0045879	negative regulation of smoothened signaling pathway	biological_process	9	0.00514748	102178142;102185032;	GLI3;KCTD11;
GO:0006366	transcription from RNA polymerase II promoter	biological_process	9	0.00542369	102171737;102177693;102180913;102185379;102186419;102189403;106501749;	ETV2;HOXC11;PITX3;PLAG1;TARDBP;SALL2;FOXC2;
GO:0000380	alternative mRNA splicing, via spliceosome	biological_process	14	0.0059092	102171331;102184427;	SRSF6;LOC102184427;
GO:0006376	mRNA splice site selection	biological_process	9	0.0059092	102171331;102184427;	SRSF6;LOC102184427;
GO:0030506	ankyrin binding	molecular_function	6	0.0059092	102184670;102188225;	KCTD6;SPTB;
GO:0071456	cellular response to hypoxia	biological_process	6	0.00655231	102168471;102169571;102177522;	NDRG1;CPEB2;VLDLR;
GO:0000170	sphingosine hydroxylase activity	molecular_function	5	0.00777932	102179052	DEGS2
GO:0003421	growth plate cartilage axis specification	biological_process	6	0.00777932	102179386	STC1
GO:0004666	prostaglandin-endoperoxide synthase activity	molecular_function	6	0.00777932	100860905	PTGS2
GO:0004812	aminoacyl-tRNA ligase activity	molecular_function	6	0.00777932	106503176	LOC106503176
GO:0006667	sphinganine metabolic process	biological_process	8	0.00777932	102179052	DEGS2
GO:0007402	ganglion mother cell fate determination	biological_process	7	0.00777932	102181070	NTF4
GO:0008052	sensory organ boundary specification	biological_process	7	0.00777932	102181070	NTF4
GO:0016011	dystroglycan complex	cellular_component	6	0.00777932	102178403	DAG1
GO:0019371	cyclooxygenase pathway	biological_process	12	0.00777932	100860905	PTGS2
GO:0021682	nerve maturation	biological_process	6	0.00777932	102178403	DAG1
GO:0022018	lateral ganglionic eminence cell proliferation	biological_process	7	0.00777932	102178142	GLI3
GO:0030264	nuclear fragmentation involved in apoptotic nuclear change	biological_process	7	0.00777932	102186419	TARDBP
GO:0031812	P2Y1 nucleotide receptor binding	molecular_function	8	0.00777932	102187803	DLG4
GO:0032273	positive regulation of protein polymerization	biological_process	8	0.00777932	102185041	TPPP
GO:0033842	N-acetyl-beta-glucosaminyl-glycoprotein 4-beta-N-acetylgalactosaminyltransferase activity	molecular_function	8	0.00777932	102188023	LOC102188023
GO:0034124	regulation of MyD88-dependent toll-like receptor signaling pathway	biological_process	9	0.00777932	106503773	IRF7
GO:0034127	regulation of MyD88-independent toll-like receptor signaling pathway	biological_process	9	0.00777932	106503773	IRF7
GO:0034189	very-low-density lipoprotein particle binding	molecular_function	5	0.00777932	102177522	VLDLR
GO:0034447	very-low-density lipoprotein particle clearance	biological_process	5	0.00777932	102177522	VLDLR
GO:0038025	reelin receptor activity	molecular_function	6	0.00777932	102177522	VLDLR
GO:0038203	TORC2 signaling	biological_process	7	0.00777932	102172562	PRR5L
GO:0043533	inositol 1,3,4,5 tetrakisphosphate binding	molecular_function	6	0.00777932	102188250	ADAP2
GO:0045906	negative regulation of vasoconstriction	biological_process	10	0.00777932	102178091	ADM
GO:0045980	negative regulation of nucleotide metabolic process	biological_process	9	0.00777932	102191092	CDA
GO:0046466	membrane lipid catabolic process	biological_process	8	0.00777932	102184252	LOC102184252
GO:0060366	lambdoid suture morphogenesis	biological_process	7	0.00777932	102178142	GLI3
GO:0060367	sagittal suture morphogenesis	biological_process	7	0.00777932	102178142	GLI3
GO:0060594	mammary gland specification	biological_process	7	0.00777932	102178142	GLI3
GO:0060803	BMP signaling pathway involved in mesodermal cell fate specification	biological_process	11	0.00777932	102171737	ETV2
GO:0060873	anterior semicircular canal development	biological_process	7	0.00777932	102178142	GLI3
GO:0060875	lateral semicircular canal development	biological_process	7	0.00777932	102178142	GLI3
GO:0070563	negative regulation of vitamin D receptor signaling pathway	biological_process	9	0.00777932	102191231	KANK2
GO:0071765	nuclear inner membrane organization	biological_process	7	0.00777932	102186419	TARDBP
GO:0072560	type B pancreatic cell maturation	biological_process	9	0.00777932	102182306	RFX3
GO:0090232	positive regulation of spindle checkpoint	biological_process	9	0.00777932	102168471	NDRG1
GO:1902257	negative regulation of apoptotic process involved in outflow tract morphogenesis	biological_process	8	0.00777932	106501749	FOXC2
GO:1903010	regulation of bone development	biological_process	7	0.00777932	102178142	GLI3
GO:1903403	negative regulation of renal phosphate excretion	biological_process	7	0.00777932	102179386	STC1
GO:0004435	phosphatidylinositol phospholipase C activity	molecular_function	9	0.00942958	102178972;102183272;	PLCE1;PLCL2;
GO:0046875	ephrin receptor binding	molecular_function	6	0.00942958	102169974;102178126;	EFNB2;EFNA4;
GO:0048025	negative regulation of mRNA splicing, via spliceosome	biological_process	10	0.00942958	102171331;102184427;	SRSF6;LOC102184427;
GO:0008285	negative regulation of cell proliferation	biological_process	7	0.00992109	102168471;102178142;102184252;102184896;102191231;	NDRG1;GLI3;LOC102184252;WNT9A;KANK2;
GO:0001890	placenta development	biological_process	6	0.0104242	102171737;102185801;	ETV2;GJB3;
GO:0048589	developmental growth	biological_process	4	0.0104242	102178091;102178142;	ADM;GLI3;
GO:0008277	regulation of G-protein coupled receptor protein signaling pathway	biological_process	8	0.0114631	102178972;108635183;	PLCE1;LOC108635183;
GO:0009954	proximal/distal pattern formation	biological_process	6	0.0148382	102177693;102178142;	HOXC11;GLI3;
GO:0002337	B-1a B cell differentiation	biological_process	11	0.0154985	102183272	PLCL2
GO:0006725	cellular aromatic compound metabolic process	biological_process	5	0.0154985	102184252	LOC102184252
GO:0008187	poly-pyrimidine tract binding	molecular_function	8	0.0154985	102169571	CPEB2
GO:0008467	[heparan sulfate]-glucosamine 3-sulfotransferase 1 activity	molecular_function	8	0.0154985	102176690	HS3ST5
GO:0009279	cell outer membrane	cellular_component	5	0.0154985	102178403	DAG1
GO:0021861	forebrain radial glial cell differentiation	biological_process	8	0.0154985	102178142	GLI3
GO:0030825	positive regulation of cGMP metabolic process	biological_process	NA	0.0154985	102188440	FZD2
GO:0031704	apelin receptor binding	molecular_function	8	0.0154985	102188120	APLN
GO:0032607	interferon-alpha production	biological_process	6	0.0154985	106503773	IRF7
GO:0032608	interferon-beta production	biological_process	6	0.0154985	106503773	IRF7
GO:0034436	glycoprotein transport	biological_process	10	0.0154985	102177522	VLDLR
GO:0034437	glycoprotein transporter activity	molecular_function	NA	0.0154985	102177522	VLDLR
GO:0035470	positive regulation of vascular wound healing	biological_process	9	0.0154985	106501749	FOXC2
GO:0042284	sphingolipid delta-4 desaturase activity	molecular_function	6	0.0154985	102179052	DEGS2
GO:0045234	protein palmitoleylation	biological_process	10	0.0154985	102178101	LOC102178101
GO:0045351	type I interferon biosynthetic process	biological_process	8	0.0154985	106503773	IRF7
GO:0045900	negative regulation of translational elongation	biological_process	11	0.0154985	102169571	CPEB2
GO:0046639	negative regulation of alpha-beta T cell differentiation	biological_process	11	0.0154985	102178142	GLI3
GO:0046885	regulation of hormone biosynthetic process	biological_process	8	0.0154985	102191082	STC2
GO:0048343	paraxial mesodermal cell fate commitment	biological_process	8	0.0154985	106501749	FOXC2
GO:0061005	cell differentiation involved in kidney development	biological_process	6	0.0154985	102178142	GLI3
GO:0061193	taste bud development	biological_process	7	0.0154985	102181070	NTF4
GO:0071221	cellular response to bacterial lipopeptide	biological_process	9	0.0154985	102184116	LOC102184116
GO:0072011	glomerular endothelium development	biological_process	8	0.0154985	106501749	FOXC2
GO:1900248	negative regulation of cytoplasmic translational elongation	biological_process	12	0.0154985	102169571	CPEB2
GO:1901028	regulation of mitochondrial outer membrane permeabilization involved in apoptotic signaling pathway	biological_process	9	0.0154985	102190818	TMEM102
GO:1902807	negative regulation of cell cycle G1/S phase transition	biological_process	10	0.0154985	102190585	C28H10orf99
GO:2000078	positive regulation of type B pancreatic cell development	biological_process	9	0.0154985	102182306	RFX3
GO:2000382	positive regulation of mesoderm development	biological_process	7	0.0154985	102171737	ETV2
GO:0008013	beta-catenin binding	molecular_function	5	0.0166495	102170104;102178142;	SLC9A3R2;GLI3;
GO:0005925	focal adhesion	cellular_component	7	0.0173021	102169974;102170104;102177680;102178403;102180469;102188440;108635183;	EFNB2;SLC9A3R2;LIMK1;DAG1;TRIOBP;FZD2;LOC108635183;
GO:0045944	positive regulation of transcription from RNA polymerase II promoter	biological_process	10	0.0174219	102171737;102177651;102177693;102178142;102180913;102181596;102182306;102185379;102186419;106501749;106503773;	ETV2;FHOD1;HOXC11;GLI3;PITX3;SPAG8;RFX3;PLAG1;TARDBP;FOXC2;IRF7;
GO:0006874	cellular calcium ion homeostasis	biological_process	11	0.0179599	102179386;102191082;	STC1;STC2;
GO:0000978	RNA polymerase II core promoter proximal region sequence-specific DNA binding	molecular_function	10	0.01831	102171737;102177693;102178142;102178726;102180913;102185379;	ETV2;HOXC11;GLI3;ZNF395;PITX3;PLAG1;
GO:0007154	cell communication	biological_process	4	0.0185859	102185801	GJB3
GO:0030199	collagen fibril organization	biological_process	7	0.0185859	102184252;106501749;	LOC102184252;FOXC2;
GO:0030819	positive regulation of cAMP biosynthetic process	biological_process	NA	0.0185859	100860907;102178091;	PTHLH;ADM;
GO:0007219	Notch signaling pathway	biological_process	6	0.0193263	102171737;106501749;106503241;	ETV2;FOXC2;HES7;
GO:0007267	cell-cell signaling	biological_process	5	0.0200305	102181070;102188305;102188440;	NTF4;CD70;FZD2;
GO:0015631	tubulin binding	molecular_function	6	0.021282	102178403;102185041;	DAG1;TPPP;
GO:0032281	AMPA glutamate receptor complex	cellular_component	8	0.021282	102178101;102187803;	LOC102178101;DLG4;
GO:0060548	negative regulation of cell death	biological_process	7	0.021282	102171331;102184427;	SRSF6;LOC102184427;
GO:0050830	defense response to Gram-positive bacterium	biological_process	9	0.0226872	102178091;102190585;	ADM;C28H10orf99;
GO:0001882	nucleoside binding	molecular_function	5	0.023158	102191092	CDA
GO:0002819	regulation of adaptive immune response	biological_process	7	0.023158	106503773	IRF7
GO:0002930	trabecular meshwork development	biological_process	6	0.023158	102184252	LOC102184252
GO:0004126	cytidine deaminase activity	molecular_function	7	0.023158	102191092	CDA
GO:0005166	neurotrophin p75 receptor binding	molecular_function	8	0.023158	102181070	NTF4
GO:0006418	tRNA aminoacylation for protein translation	biological_process	12	0.023158	106503176	LOC106503176
GO:0006477	protein sulfation	biological_process	9	0.023158	102176690	HS3ST5
GO:0008321	Ral guanyl-nucleotide exchange factor activity	molecular_function	9	0.023158	102168443	RGL3
GO:0009972	cytidine deamination	biological_process	13	0.023158	102191092	CDA
GO:0014873	response to muscle activity involved in regulation of muscle adaptation	biological_process	6	0.023158	102183843	SRL
GO:0019048	modulation by virus of host morphology or physiology	biological_process	7	0.023158	102178403	DAG1
GO:0021775	smoothened signaling pathway involved in ventral spinal cord interneuron specification	biological_process	8	0.023158	102178142	GLI3
GO:0021776	smoothened signaling pathway involved in spinal cord motor neuron cell fate specification	biological_process	8	0.023158	102178142	GLI3
GO:0030835	negative regulation of actin filament depolymerization	biological_process	9	0.023158	102188601	PLEKHH2
GO:0031545	peptidyl-proline 4-dioxygenase activity	molecular_function	8	0.023158	102179524	EGLN3
GO:0031697	beta-1 adrenergic receptor binding	molecular_function	8	0.023158	102187803	DLG4
GO:0032059	bleb	cellular_component	6	0.023158	102177651	FHOD1
GO:0032414	positive regulation of ion transmembrane transporter activity	biological_process	7	0.023158	102184280	WNK4
GO:0038026	reelin-mediated signaling pathway	biological_process	6	0.023158	102177522	VLDLR
GO:0038163	thrombopoietin-mediated signaling pathway	biological_process	8	0.023158	102181435	THPO
GO:0042506	tyrosine phosphorylation of Stat5 protein	biological_process	NA	0.023158	102182806	PTK6
GO:0044309	neuron spine	cellular_component	6	0.023158	102187803	DLG4
GO:0060287	epithelial cilium movement involved in determination of left/right asymmetry	biological_process	8	0.023158	102182306	RFX3
GO:0072144	glomerular mesangial cell development	biological_process	7	0.023158	106501749	FOXC2
GO:0097084	vascular smooth muscle cell development	biological_process	7	0.023158	102178091	ADM
GO:0097113	AMPA glutamate receptor clustering	biological_process	9	0.023158	102187803	DLG4
GO:1900122	positive regulation of receptor binding	biological_process	8	0.023158	102183272	PLCL2
GO:2000021	regulation of ion homeostasis	biological_process	NA	0.023158	102184280	WNK4
GO:0048704	embryonic skeletal system morphogenesis	biological_process	7	0.0241298	102178142;102184896;	GLI3;WNT9A;
GO:0051496	positive regulation of stress fiber assembly	biological_process	8	0.025609	102177651;102177680;	FHOD1;LIMK1;
GO:0003730	mRNA 3'-UTR binding	molecular_function	8	0.0271241	102169571;102186419;	CPEB2;TARDBP;
GO:0004197	cysteine-type endopeptidase activity	molecular_function	8	0.0271241	102171134;108635183;	CTSW;LOC108635183;
GO:0017147	Wnt-protein binding	molecular_function	5	0.0271241	102178101;102188440;	LOC102178101;FZD2;
GO:0007264	small GTPase mediated signal transduction	biological_process	6	0.0294942	100861132;102168443;102178972;102189645;102189974;	RAB30;RGL3;PLCE1;VAV3;RAB39A;
GO:0001933	negative regulation of protein phosphorylation	biological_process	10	0.0302597	102172562;102186419;	PRR5L;TARDBP;
GO:0005109	frizzled binding	molecular_function	7	0.0302597	102176310;102184896;	WNT5B;WNT9A;
GO:0008203	cholesterol metabolic process	biological_process	8	0.0302597	102177522	VLDLR
GO:0034599	cellular response to oxidative stress	biological_process	6	0.0302597	102169571;102177676;	CPEB2;TXNDC2;
GO:0048812	neuron projection morphogenesis	biological_process	8	0.0302597	102178709;102181070;	BRSK2;NTF4;
GO:0002091	negative regulation of receptor internalization	biological_process	8	0.0307582	102187803	DLG4
GO:0003150	muscular septum morphogenesis	biological_process	7	0.0307582	102188440	FZD2
GO:0004422	hypoxanthine phosphoribosyltransferase activity	molecular_function	8	0.0307582	102173632	LOC102173632
GO:0006178	guanine salvage	biological_process	12	0.0307582	102173632	LOC102173632
GO:0007016	cytoskeletal anchoring at plasma membrane	biological_process	7	0.0307582	102178403	DAG1
GO:0007442	hindgut morphogenesis	biological_process	5	0.0307582	102178142	GLI3
GO:0015015	heparan sulfate proteoglycan biosynthetic process, enzymatic modification	biological_process	10	0.0307582	102176690	HS3ST5
GO:0015467	G-protein activated inward rectifier potassium channel activity	molecular_function	11	0.0307582	102170924	KCNJ9
GO:0017089	glycolipid transporter activity	molecular_function	5	0.0307582	102176547	GLTP
GO:0018401	peptidyl-proline hydroxylation to 4-hydroxy-L-proline	biological_process	7	0.0307582	102179524	EGLN3
GO:0019888	protein phosphatase regulator activity	molecular_function	6	0.0307582	102172686	PPP1R3C
GO:0021517	ventral spinal cord development	biological_process	5	0.0307582	102177522	VLDLR
GO:0030229	very-low-density lipoprotein particle receptor activity	molecular_function	5	0.0307582	102177522	VLDLR
GO:0030510	regulation of BMP signaling pathway	biological_process	10	0.0307582	102183457	RGMA
GO:0032263	GMP salvage	biological_process	10	0.0307582	102173632	LOC102173632
GO:0034185	apolipoprotein binding	molecular_function	5	0.0307582	102177522	VLDLR
GO:0035694	mitochondrial protein catabolic process	biological_process	9	0.0307582	102178036	BNIP3
GO:0042490	mechanoreceptor differentiation	biological_process	7	0.0307582	102181070	NTF4
GO:0046100	hypoxanthine metabolic process	biological_process	10	0.0307582	102173632	LOC102173632
GO:0046578	regulation of Ras protein signal transduction	biological_process	10	0.0307582	102178972	PLCE1
GO:0046836	glycolipid transport	biological_process	8	0.0307582	102176547	GLTP
GO:0050819	negative regulation of coagulation	biological_process	7	0.0307582	102176690	HS3ST5
GO:0050859	negative regulation of B cell receptor signaling pathway	biological_process	10	0.0307582	102183272	PLCL2
GO:0050920	regulation of chemotaxis	biological_process	7	0.0307582	102169974	EFNB2
GO:0051444	negative regulation of ubiquitin-protein transferase activity	biological_process	12	0.0307582	102177680	LIMK1
GO:0051861	glycolipid binding	molecular_function	5	0.0307582	102176547	GLTP
GO:0051926	negative regulation of calcium ion transport	biological_process	9	0.0307582	102179386	STC1
GO:0060022	hard palate development	biological_process	5	0.0307582	102188440	FZD2
GO:0060252	positive regulation of glial cell proliferation	biological_process	8	0.0307582	102185379	PLAG1
GO:0060285	cilium-dependent cell motility	biological_process	7	0.0307582	102182306	RFX3
GO:0060364	frontal suture morphogenesis	biological_process	7	0.0307582	102178142	GLI3
GO:0060840	artery development	biological_process	6	0.0307582	102178142	GLI3
GO:0061304	retinal blood vessel morphogenesis	biological_process	7	0.0307582	102184252	LOC102184252
GO:0070242	thymocyte apoptotic process	biological_process	10	0.0307582	102178142	GLI3
GO:0070294	renal sodium ion absorption	biological_process	7	0.0307582	102184280	WNK4
GO:0071603	endothelial cell-cell adhesion	biological_process	7	0.0307582	102184252	LOC102184252
GO:0072112	glomerular visceral epithelial cell differentiation	biological_process	7	0.0307582	106501749	FOXC2
GO:1902035	positive regulation of hematopoietic stem cell proliferation	biological_process	9	0.0307582	102181435	THPO
GO:1990124	messenger ribonucleoprotein complex	cellular_component	5	0.0307582	102169571	CPEB2
GO:2000821	regulation of grooming behavior	biological_process	6	0.0307582	102187803	DLG4
GO:0000381	regulation of alternative mRNA splicing, via spliceosome	biological_process	10	0.0318789	102171331;102184427;	SRSF6;LOC102184427;
GO:0001756	somitogenesis	biological_process	7	0.0318789	106501749;106503241;	FOXC2;HES7;
GO:0007049	cell cycle	biological_process	4	0.0350985	102178709;102191360;	BRSK2;BANP;
GO:0001945	lymph vessel development	biological_process	5	0.0382997	102169974	EFNB2
GO:0002687	positive regulation of leukocyte migration	biological_process	7	0.0382997	102191637	TNFRSF18
GO:0004128	cytochrome-b5 reductase activity, acting on NAD(P)H	molecular_function	7	0.0382997	102186611	LOC102186611
GO:0004365	glyceraldehyde-3-phosphate dehydrogenase (NAD+) (phosphorylating) activity	molecular_function	8	0.0382997	102181330	GAPDHS
GO:0005095	GTPase inhibitor activity	molecular_function	6	0.0382997	102169571	CPEB2
GO:0006020	inositol metabolic process	biological_process	7	0.0382997	102173853	ITPKA
GO:0006168	adenine salvage	biological_process	12	0.0382997	102173632	LOC102173632
GO:0009404	toxin metabolic process	biological_process	5	0.0382997	102184252	LOC102184252
GO:0015276	ligand-gated ion channel activity	molecular_function	7	0.0382997	102187803	DLG4
GO:0021631	optic nerve morphogenesis	biological_process	6	0.0382997	102178142	GLI3
GO:0030321	transepithelial chloride transport	biological_process	10	0.0382997	102179639	BEST1
GO:0032330	regulation of chondrocyte differentiation	biological_process	7	0.0382997	100860907	PTHLH
GO:0032839	dendrite cytoplasm	cellular_component	9	0.0382997	102187803	DLG4
GO:0033629	negative regulation of cell adhesion mediated by integrin	biological_process	7	0.0382997	102184252	LOC102184252
GO:0035663	Toll-like receptor 2 binding	molecular_function	7	0.0382997	102184116	LOC102184116
GO:0036157	outer dynein arm	cellular_component	7	0.0382997	102176355	CCDC114
GO:0042503	tyrosine phosphorylation of Stat3 protein	biological_process	NA	0.0382997	102182806	PTK6
GO:0043068	positive regulation of programmed cell death	biological_process	8	0.0382997	102178036	BNIP3
GO:0044300	cerebellar mossy fiber	cellular_component	7	0.0382997	102187803	DLG4
GO:0045576	mast cell activation	biological_process	7	0.0382997	102168471	NDRG1
GO:0046596	regulation of viral entry into host cell	biological_process	9	0.0382997	102176690	HS3ST5
GO:0051310	metaphase plate congression	biological_process	8	0.0382997	102188974	MEIOC
GO:0051428	peptide hormone receptor binding	molecular_function	7	0.0382997	100860907	PTHLH
GO:0070286	axonemal dynein complex assembly	biological_process	8	0.0382997	102187159	DNAAF3
GO:0071679	commissural neuron axon guidance	biological_process	7	0.0382997	102178403	DAG1
GO:0072178	nephric duct morphogenesis	biological_process	8	0.0382997	102169974	EFNB2
GO:0090383	phagosome acidification	biological_process	13	0.0382997	102189974	RAB39A
GO:0090385	phagosome-lysosome fusion	biological_process	8	0.0382997	102189974	RAB39A
GO:0097109	neuroligin family protein binding	molecular_function	6	0.0382997	102187803	DLG4
GO:1990454	L-type voltage-gated calcium channel complex	cellular_component	10	0.0382997	102182803	CACNB2
GO:1990565	HSP90-CDC37 chaperone complex	cellular_component	6	0.0382997	106503653	LOC106503653
GO:0048013	ephrin receptor signaling pathway	biological_process	8	0.038684	102169974;102178126;	EFNB2;EFNA4;
GO:0000981	RNA polymerase II transcription factor activity, sequence-specific DNA binding	molecular_function	5	0.040162	102171737;102185379;102185425;106501749;	ETV2;PLAG1;FOXO6;FOXC2;
GO:0005874	microtubule	cellular_component	7	0.040162	102168471;102185041;	NDRG1;TPPP;
GO:0016055	Wnt signaling pathway	biological_process	7	0.0411176	102171737;102176310;102184896;	ETV2;WNT5B;WNT9A;
GO:0050885	neuromuscular process controlling balance	biological_process	7	0.0422752	102187803	DLG4
GO:0000103	sulfate assimilation	biological_process	6	0.0457828	102177676	TXNDC2
GO:0003149	membranous septum morphogenesis	biological_process	5	0.0457828	102188440	FZD2
GO:0006309	apoptotic DNA fragmentation	biological_process	10	0.0457828	102182992	DFFB
GO:0007144	female meiosis I	biological_process	8	0.0457828	102188974	MEIOC
GO:0007406	negative regulation of neuroblast proliferation	biological_process	10	0.0457828	102185032	KCTD11
GO:0008091	spectrin	cellular_component	6	0.0457828	102188225	SPTB
GO:0010225	response to UV-C	biological_process	8	0.0457828	102185968	DCUN1D3
GO:0014731	spectrin-associated cytoskeleton	cellular_component	7	0.0457828	102188225	SPTB
GO:0014807	regulation of somitogenesis	biological_process	7	0.0457828	106503241	HES7
GO:0016671	oxidoreductase activity, acting on a sulfur group of donors, disulfide as acceptor	molecular_function	6	0.0457828	102177676	TXNDC2
GO:0023052	signaling	biological_process	3	0.0457828	102188120	APLN
GO:0031748	D1 dopamine receptor binding	molecular_function	8	0.0457828	102187803	DLG4
GO:0032182	ubiquitin-like protein binding	molecular_function	5	0.0457828	102185968	DCUN1D3
GO:0032287	peripheral nervous system myelin maintenance	biological_process	8	0.0457828	102168471	NDRG1
GO:0033130	acetylcholine receptor binding	molecular_function	6	0.0457828	102187803	DLG4
GO:0035925	mRNA 3'-UTR AU-rich region binding	molecular_function	9	0.0457828	102169571	CPEB2
GO:0035988	chondrocyte proliferation	biological_process	4	0.0457828	102179386	STC1
GO:0042574	retinal metabolic process	biological_process	11	0.0457828	102184252	LOC102184252
GO:0045654	positive regulation of megakaryocyte differentiation	biological_process	9	0.0457828	102181435	THPO
GO:0046785	microtubule polymerization	biological_process	9	0.0457828	102185041	TPPP
GO:0060119	inner ear receptor cell development	biological_process	7	0.0457828	102188440	FZD2
GO:0060334	regulation of interferon-gamma-mediated signaling pathway	biological_process	9	0.0457828	106503653	LOC106503653
GO:0060338	regulation of type I interferon-mediated signaling pathway	biological_process	9	0.0457828	106503653	LOC106503653
GO:0060575	intestinal epithelial cell differentiation	biological_process	8	0.0457828	102182806	PTK6
GO:0060907	positive regulation of macrophage cytokine production	biological_process	9	0.0457828	102178968	GPRC5B
GO:0071711	basement membrane organization	biological_process	7	0.0457828	102178403	DAG1
GO:0086004	regulation of cardiac muscle cell contraction	biological_process	11	0.0457828	102179386	STC1
GO:0090050	positive regulation of cell migration involved in sprouting angiogenesis	biological_process	12	0.0457828	106501749	FOXC2
GO:2000727	positive regulation of cardiac muscle cell differentiation	biological_process	10	0.0457828	102169974	EFNB2
GO:2000766	negative regulation of cytoplasmic translation	biological_process	11	0.0457828	102169571	CPEB2
GO:2001256	regulation of store-operated calcium entry	biological_process	10	0.0457828	102191082	STC2
GO:0045165	cell fate commitment	biological_process	5	0.0478848	102176310;102184896;	WNT5B;WNT9A;
GO:0007165	signal transduction	biological_process	4	0.0495144	102169841;102177522;102178227;102187803;102188120;102188305;102189403;102190818;	GNB3;VLDLR;CDC42SE1;DLG4;APLN;CD70;SALL2;TMEM102;
GO:0032869	cellular response to insulin stimulus	biological_process	8	0.0498117	102169571;102177522;	CPEB2;VLDLR;
GO:0042733	embryonic digit morphogenesis	biological_process	6	0.0498117	102177693;102178142;	HOXC11;GLI3;
GO:0070588	calcium ion transmembrane transport	biological_process	11	0.0510526	102177287;102182803;	TMEM37;CACNB2;
GO:0001948	glycoprotein binding	molecular_function	NA	0.0517664	102177522;102181150;	VLDLR;FBXO17;
GO:0032092	positive regulation of protein binding	biological_process	7	0.0517664	102181596;108635183;	SPAG8;LOC108635183;
GO:0043154	negative regulation of cysteine-type endopeptidase activity involved in apoptotic process	biological_process	10	0.0517664	102184896	WNT9A
GO:0000900	translation repressor activity, nucleic acid binding	molecular_function	5	0.0532081	102169571	CPEB2
GO:0002011	morphogenesis of an epithelial sheet	biological_process	7	0.0532081	102178403	DAG1
GO:0002089	lens morphogenesis in camera-type eye	biological_process	5	0.0532081	102180913	PITX3
GO:0002115	store-operated calcium entry	biological_process	11	0.0532081	102183843	SRL
GO:0002322	B cell proliferation involved in immune response	biological_process	9	0.0532081	102183272	PLCL2
GO:0004385	guanylate kinase activity	molecular_function	8	0.0532081	102187803	DLG4
GO:0006809	nitric oxide biosynthetic process	biological_process	8	0.0532081	102184252	LOC102184252
GO:0008440	inositol-1,4,5-trisphosphate 3-kinase activity	molecular_function	8	0.0532081	102173853	ITPKA
GO:0008631	intrinsic apoptotic signaling pathway in response to oxidative stress	biological_process	7	0.0532081	102184252	LOC102184252
GO:0009100	glycoprotein metabolic process	biological_process	7	0.0532081	102178101	LOC102178101
GO:0010762	regulation of fibroblast migration	biological_process	8	0.0532081	102172562	PRR5L
GO:0016188	synaptic vesicle maturation	biological_process	7	0.0532081	102187803	DLG4
GO:0021798	forebrain dorsal/ventral pattern formation	biological_process	7	0.0532081	102178142	GLI3
GO:0022612	gland morphogenesis	biological_process	6	0.0532081	102185379	PLAG1
GO:0032264	IMP salvage	biological_process	13	0.0532081	102173632	LOC102173632
GO:0032835	glomerulus development	biological_process	5	0.0532081	102178972	PLCE1
GO:0033135	regulation of peptidyl-serine phosphorylation	biological_process	10	0.0532081	102183272	PLCL2
GO:0035418	protein localization to synapse	biological_process	6	0.0532081	102187803	DLG4
GO:0044070	regulation of anion transport	biological_process	8	0.0532081	102179386	STC1
GO:0046638	positive regulation of alpha-beta T cell differentiation	biological_process	11	0.0532081	102178142	GLI3
GO:0046710	GDP metabolic process	biological_process	11	0.0532081	102187803	DLG4
GO:0050811	GABA receptor binding	molecular_function	6	0.0532081	102183272	PLCL2
GO:0051782	negative regulation of cell division	biological_process	7	0.0532081	102190585	C28H10orf99
GO:0060670	branching involved in labyrinthine layer morphogenesis	biological_process	5	0.0532081	102178091	ADM
GO:0060712	spongiotrophoblast layer development	biological_process	6	0.0532081	102178091	ADM
GO:0060736	prostate gland growth	biological_process	5	0.0532081	102185379	PLAG1
GO:0060831	smoothened signaling pathway involved in dorsal/ventral neural tube patterning	biological_process	7	0.0532081	102178142	GLI3
GO:0070306	lens fiber cell differentiation	biological_process	7	0.0532081	102180913	PITX3
GO:0070938	contractile ring	cellular_component	4	0.0532081	102178403	DAG1
GO:0071243	cellular response to arsenic-containing substance	biological_process	6	0.0532081	102169571	CPEB2
GO:1901381	positive regulation of potassium ion transmembrane transport	biological_process	11	0.0532081	102168594	AMIGO1
GO:1901385	regulation of voltage-gated calcium channel activity	biological_process	9	0.0532081	102182803	CACNB2
GO:0009986	cell surface	cellular_component	4	0.053211	102176310;102177522;102178968;102183457;102188225;102190818;	WNT5B;VLDLR;GPRC5B;RGMA;SPTB;TMEM102;
GO:0045665	negative regulation of neuron differentiation	biological_process	10	0.0557565	102178142	GLI3
GO:0001501	skeletal system development	biological_process	6	0.0577909	100860907;106503241;	PTHLH;HES7;
GO:0001759	organ induction	biological_process	9	0.060576	102177693	HOXC11
GO:0002031	G-protein coupled receptor internalization	biological_process	10	0.060576	102178091	ADM
GO:0007584	response to nutrient	biological_process	7	0.060576	102177522	VLDLR
GO:0008210	estrogen metabolic process	biological_process	7	0.060576	102184252	LOC102184252
GO:0008328	ionotropic glutamate receptor complex	cellular_component	7	0.060576	102187803	DLG4
GO:0010470	regulation of gastrulation	biological_process	7	0.060576	102178403	DAG1
GO:0010820	positive regulation of T cell chemotaxis	biological_process	10	0.060576	102190818	TMEM102
GO:0016064	immunoglobulin mediated immune response	biological_process	8	0.060576	106503773	IRF7
GO:0030666	endocytic vesicle membrane	cellular_component	7	0.060576	102187803	DLG4
GO:0035253	ciliary rootlet	cellular_component	6	0.060576	102174633	KIF5A
GO:0035641	locomotory exploration behavior	biological_process	5	0.060576	102187803	DLG4
GO:0043069	negative regulation of programmed cell death	biological_process	8	0.060576	102191231	KANK2
GO:0043586	tongue development	biological_process	7	0.060576	102178142	GLI3
GO:0044224	juxtaparanode region of axon	cellular_component	6	0.060576	102187803	DLG4
GO:0044306	neuron projection terminus	cellular_component	5	0.060576	102187803	DLG4
GO:0045603	positive regulation of endothelial cell differentiation	biological_process	9	0.060576	102171737	ETV2
GO:0045926	negative regulation of growth	biological_process	6	0.060576	102182806	PTK6
GO:0046620	regulation of organ growth	biological_process	7	0.060576	106501749	FOXC2
GO:0048703	embryonic viscerocranium morphogenesis	biological_process	6	0.060576	106501749	FOXC2
GO:0050321	tau-protein kinase activity	molecular_function	8	0.060576	102178709	BRSK2
GO:0050730	regulation of peptidyl-tyrosine phosphorylation	biological_process	10	0.060576	102190818	TMEM102
GO:0050806	positive regulation of synaptic transmission	biological_process	8	0.060576	102187803	DLG4
GO:0097345	mitochondrial outer membrane permeabilization	biological_process	10	0.060576	102178036	BNIP3
GO:1900006	positive regulation of dendrite development	biological_process	12	0.060576	102177522	VLDLR
GO:2001214	positive regulation of vasculogenesis	biological_process	8	0.060576	102178091	ADM
GO:0019900	kinase binding	molecular_function	6	0.0640451	102178326;102187803;	JAKMIP3;DLG4;
GO:0007399	nervous system development	biological_process	6	0.0659257	102177522;102178709;102187803;	VLDLR;BRSK2;DLG4;
GO:0010976	positive regulation of neuron projection development	biological_process	11	0.0661786	102178968;102182806;	GPRC5B;PTK6;
GO:0005615	extracellular space	cellular_component	4	0.0675892	100860907;102171134;102176310;102177522;102178091;102178403;102178968;102179386;102184896;102188120;102191082;	PTHLH;CTSW;WNT5B;VLDLR;ADM;DAG1;GPRC5B;STC1;WNT9A;APLN;STC2;
GO:0000813	ESCRT I complex	cellular_component	5	0.0678868	102179344	VPS37D
GO:0001886	endothelial cell morphogenesis	biological_process	9	0.0678868	102179386	STC1
GO:0002042	cell migration involved in sprouting angiogenesis	biological_process	11	0.0678868	102169974	EFNB2
GO:0008376	acetylgalactosaminyltransferase activity	molecular_function	7	0.0678868	102188023	LOC102188023
GO:0014032	neural crest cell development	biological_process	7	0.0678868	106501749	FOXC2
GO:0031985	Golgi cisterna	cellular_component	7	0.0678868	100861132	RAB30
GO:0032228	regulation of synaptic transmission, GABAergic	biological_process	9	0.0678868	102183272	PLCL2
GO:0032727	positive regulation of interferon-alpha production	biological_process	9	0.0678868	106503773	IRF7
GO:0032809	neuronal cell body membrane	cellular_component	6	0.0678868	102168594	AMIGO1
GO:0033147	negative regulation of intracellular estrogen receptor signaling pathway	biological_process	10	0.0678868	102191231	KANK2
GO:0042511	positive regulation of tyrosine phosphorylation of Stat1 protein	biological_process	NA	0.0678868	102191637	TNFRSF18
GO:0043023	ribosomal large subunit binding	molecular_function	6	0.0678868	102169571	CPEB2
GO:0043116	negative regulation of vascular permeability	biological_process	8	0.0678868	102178091	ADM
GO:0043409	negative regulation of MAPK cascade	biological_process	11	0.0678868	102178403	DAG1
GO:0046037	GMP metabolic process	biological_process	11	0.0678868	102187803	DLG4
GO:0048255	mRNA stabilization	biological_process	11	0.0678868	102188974	MEIOC
GO:0050880	regulation of blood vessel size	biological_process	7	0.0678868	106501749	FOXC2
GO:0060272	embryonic skeletal joint morphogenesis	biological_process	8	0.0678868	102177693	HOXC11
GO:0060340	positive regulation of type I interferon-mediated signaling pathway	biological_process	10	0.0678868	106503773	IRF7
GO:0060445	branching involved in salivary gland morphogenesis	biological_process	7	0.0678868	102178403	DAG1
GO:0061099	negative regulation of protein tyrosine kinase activity	biological_process	12	0.0678868	102182806	PTK6
GO:0090280	positive regulation of calcium ion import	biological_process	10	0.0678868	102179386	STC1
GO:0005905	clathrin-coated pit	cellular_component	4	0.0683355	102172019;102177522;	LOC102172019;VLDLR;
GO:0045666	positive regulation of neuron differentiation	biological_process	10	0.0683355	102185032	KCTD11
GO:0043565	sequence-specific DNA binding	molecular_function	7	0.0703496	102182306;102185425;102189403;106501749;	RFX3;FOXO6;SALL2;FOXC2;
GO:0006906	vesicle fusion	biological_process	7	0.0705155	102189645;102189927;	VAV3;DOC2A;
GO:0019903	protein phosphatase binding	molecular_function	7	0.0705155	102172686;102187803;	PPP1R3C;DLG4;
GO:0031234	extrinsic component of cytoplasmic side of plasma membrane	cellular_component	6	0.0705155	102182806;102187803;	PTK6;DLG4;
GO:0000122	negative regulation of transcription from RNA polymerase II promoter	biological_process	10	0.0729055	102173156;102177522;102178142;102189403;102191231;106501749;106503241;	MXI1;VLDLR;GLI3;SALL2;KANK2;FOXC2;HES7;
GO:0048471	perinuclear region of cytoplasm	cellular_component	6	0.0732398	102168471;102177522;102185041;102185968;102191082;108635183;	NDRG1;VLDLR;TPPP;DCUN1D3;STC2;LOC108635183;
GO:0016477	cell migration	biological_process	6	0.0740257	102169974;102182806;108635183;	EFNB2;PTK6;LOC108635183;
GO:0016607	nuclear speck	cellular_component	8	0.0740257	102171331;102178142;102184427;	SRSF6;GLI3;LOC102184427;
GO:0032088	negative regulation of NF-kappaB transcription factor activity	biological_process	7	0.0749425	102184252	LOC102184252
GO:0001946	lymphangiogenesis	biological_process	5	0.0751412	106501749	FOXC2
GO:0004518	nuclease activity	molecular_function	6	0.0751412	102182992	DFFB
GO:0005041	low-density lipoprotein receptor activity	molecular_function	5	0.0751412	102177522	VLDLR
GO:0005319	lipid transporter activity	molecular_function	4	0.0751412	102173909	LOC102173909
GO:0010596	negative regulation of endothelial cell migration	biological_process	10	0.0751412	102179386	STC1
GO:0017166	vinculin binding	molecular_function	6	0.0751412	102178403	DAG1
GO:0030676	Rac guanyl-nucleotide exchange factor activity	molecular_function	10	0.0751412	102189645	VAV3
GO:0031932	TORC2 complex	cellular_component	4	0.0751412	102172562	PRR5L
GO:0048599	oocyte development	biological_process	6	0.0751412	102188974	MEIOC
GO:0060441	epithelial tube branching involved in lung morphogenesis	biological_process	7	0.0751412	102178403	DAG1
GO:0060997	dendritic spine morphogenesis	biological_process	8	0.0751412	102187803	DLG4
GO:0070935	3'-UTR-mediated mRNA stabilization	biological_process	12	0.0751412	102186419	TARDBP
GO:0097120	receptor localization to synapse	biological_process	7	0.0751412	102187803	DLG4
GO:0007268	chemical synaptic transmission	biological_process	9	0.0768198	102172019;102182803;102187803;	LOC102172019;CACNB2;DLG4;
GO:0043005	neuron projection	cellular_component	5	0.0768198	102169571;102174633;102177680;	CPEB2;KIF5A;LIMK1;
GO:0005200	structural constituent of cytoskeleton	molecular_function	4	0.0771887	102188225	SPTB
GO:0001843	neural tube closure	biological_process	7	0.0794559	102178091	ADM
GO:0007626	locomotory behavior	biological_process	4	0.0817438	102178968;102180913;	GPRC5B;PITX3;
GO:0008135	translation factor activity, RNA binding	molecular_function	7	0.0823394	102169571	CPEB2
GO:0010717	regulation of epithelial to mesenchymal transition	biological_process	7	0.0823394	102178403	DAG1
GO:0010839	negative regulation of keratinocyte proliferation	biological_process	9	0.0823394	102169974	EFNB2
GO:0019731	antibacterial humoral response	biological_process	7	0.0823394	102178091	ADM
GO:0022011	myelination in peripheral nervous system	biological_process	7	0.0823394	102178403	DAG1
GO:0033268	node of Ranvier	cellular_component	6	0.0823394	102178403	DAG1
GO:0035050	embryonic heart tube development	biological_process	6	0.0823394	106501749	FOXC2
GO:0036158	outer dynein arm assembly	biological_process	9	0.0823394	102176355	CCDC114
GO:0040015	negative regulation of multicellular organism growth	biological_process	8	0.0823394	102191082	STC2
GO:0043922	negative regulation by host of viral transcription	biological_process	10	0.0823394	102186419	TARDBP
GO:0044458	motile cilium assembly	biological_process	8	0.0823394	102187159	DNAAF3
GO:0045060	negative thymic T cell selection	biological_process	6	0.0823394	102178142	GLI3
GO:0045664	regulation of neuron differentiation	biological_process	9	0.0823394	102181070	NTF4
GO:0046427	positive regulation of JAK-STAT cascade	biological_process	10	0.0823394	102184252	LOC102184252
GO:0060999	positive regulation of dendritic spine development	biological_process	13	0.0823394	102185425	FOXO6
GO:0090179	planar cell polarity pathway involved in neural tube closure	biological_process	10	0.0823394	102188440	FZD2
GO:0044212	transcription regulatory region DNA binding	molecular_function	7	0.0840049	102182306;102189403;106501749;	RFX3;SALL2;FOXC2;
GO:0051260	protein homooligomerization	biological_process	8	0.0840049	102184670;102185032;102187705;	KCTD6;KCTD11;KCTD15;
GO:0008076	voltage-gated potassium channel complex	cellular_component	9	0.0863799	102168594;102187803;	AMIGO1;DLG4;
GO:0002224	toll-like receptor signaling pathway	biological_process	8	0.0894819	102184116	LOC102184116
GO:0007141	male meiosis I	biological_process	8	0.0894819	102188974	MEIOC
GO:0008378	galactosyltransferase activity	molecular_function	7	0.0894819	102176255	B3GNT9
GO:0015026	coreceptor activity	molecular_function	5	0.0894819	102183457	RGMA
GO:0017016	Ras GTPase binding	molecular_function	8	0.0894819	102168443	RGL3
GO:0017160	Ral GTPase binding	molecular_function	9	0.0894819	108635183	LOC108635183
GO:0019887	protein kinase regulator activity	molecular_function	6	0.0894819	106503653	LOC106503653
GO:0031462	Cul2-RING ubiquitin ligase complex	cellular_component	7	0.0894819	102168382	LOC102168382
GO:0032332	positive regulation of chondrocyte differentiation	biological_process	8	0.0894819	102178142	GLI3
GO:0033630	positive regulation of cell adhesion mediated by integrin	biological_process	7	0.0894819	106501749	FOXC2
GO:0043542	endothelial cell migration	biological_process	9	0.0894819	102184252	LOC102184252
GO:0050908	detection of light stimulus involved in visual perception	biological_process	9	0.0894819	102179639	BEST1
GO:0060038	cardiac muscle cell proliferation	biological_process	6	0.0894819	106501749	FOXC2
GO:0061178	regulation of insulin secretion involved in cellular response to glucose stimulus	biological_process	6	0.0894819	102178709	BRSK2
GO:0097602	cullin family protein binding	molecular_function	5	0.0894819	102185968	DCUN1D3
GO:0007275	multicellular organism development	biological_process	4	0.0931162	102187705;102189403;102191360;102191637;	KCTD15;SALL2;BANP;TNFRSF18;
GO:0030165	PDZ domain binding	molecular_function	6	0.0934777	102187803;102188440;	DLG4;FZD2;
GO:0030336	negative regulation of cell migration	biological_process	8	0.0934777	102178403;102184252;	DAG1;LOC102184252;
GO:0006869	lipid transport	biological_process	7	0.0958802	102173909;102177522;	LOC102173909;VLDLR;
GO:0005515	protein binding	molecular_function	4	0.0965556	102169571;102173156;102177522;102177651;102178709;102182803;102185041;102187803;102191053;108637087;108637956;	CPEB2;MXI1;VLDLR;FHOD1;BRSK2;CACNB2;TPPP;DLG4;GPATCH2L;LOC108637087;LOC108637956;
GO:0007413	axonal fasciculation	biological_process	6	0.0965692	102168594	AMIGO1
GO:0010001	glial cell differentiation	biological_process	6	0.0965692	102171226	FGF5
GO:0030330	DNA damage response, signal transduction by p53 class mediator	biological_process	8	0.0965692	102168471	NDRG1
GO:0034361	very-low-density lipoprotein particle	cellular_component	6	0.0965692	102177522	VLDLR
GO:0034453	microtubule anchoring	biological_process	8	0.0965692	102178403	DAG1
GO:0035255	ionotropic glutamate receptor binding	molecular_function	7	0.0965692	102187803	DLG4
GO:0042307	positive regulation of protein import into nucleus	biological_process	10	0.0965692	102178142	GLI3
GO:0045116	protein neddylation	biological_process	11	0.0965692	102185968	DCUN1D3
GO:0045956	positive regulation of calcium ion-dependent exocytosis	biological_process	10	0.0965692	102185724	CACNA1I
GO:0048557	embryonic digestive tract morphogenesis	biological_process	7	0.0965692	102178142	GLI3
GO:0048593	camera-type eye morphogenesis	biological_process	8	0.0965692	102178142	GLI3
GO:0051393	alpha-actinin binding	molecular_function	7	0.0965692	102178403	DAG1
GO:0060076	excitatory synapse	cellular_component	4	0.0965692	102187803	DLG4
GO:0071625	vocalization behavior	biological_process	4	0.0965692	102187803	DLG4
GO:2000310	regulation of N-methyl-D-aspartate selective glutamate receptor activity	biological_process	10	0.0965692	102187803	DLG4
GO:0016485	protein processing	biological_process	8	0.100738	102173434;102178142;	RHBDL1;GLI3;
GO:0001666	response to hypoxia	biological_process	5	0.103192	102179524	EGLN3
GO:0001516	prostaglandin biosynthetic process	biological_process	11	0.103602	100860905	PTGS2
GO:0005242	inward rectifier potassium channel activity	molecular_function	10	0.103602	102170924	KCNJ9
GO:0008574	ATP-dependent microtubule motor activity, plus-end-directed	molecular_function	12	0.103602	102174633	KIF5A
GO:0009607	response to biotic stimulus	biological_process	4	0.103602	102191098	PRRT2
GO:0021819	layer formation in cerebral cortex	biological_process	5	0.103602	102178142	GLI3
GO:0043024	ribosomal small subunit binding	molecular_function	6	0.103602	102169571	CPEB2
GO:0043113	receptor clustering	biological_process	6	0.103602	102187803	DLG4
GO:0045197	establishment or maintenance of epithelial cell apical/basal polarity	biological_process	7	0.103602	102187803	DLG4
GO:0048844	artery morphogenesis	biological_process	7	0.103602	106501749	FOXC2
GO:0050832	defense response to fungus	biological_process	8	0.103602	102190585	C28H10orf99
GO:0071723	lipopeptide binding	molecular_function	5	0.103602	102184116	LOC102184116
GO:0010629	negative regulation of gene expression	biological_process	8	0.105662	102185379;102191082;	PLAG1;STC2;
GO:0002052	positive regulation of neuroblast proliferation	biological_process	10	0.11058	102178142	GLI3
GO:0005978	glycogen biosynthetic process	biological_process	10	0.11058	102172686	PPP1R3C
GO:0007616	long-term memory	biological_process	6	0.11058	102181070	NTF4
GO:0008331	high voltage-gated calcium channel activity	molecular_function	10	0.11058	102182803	CACNB2
GO:0008361	regulation of cell size	biological_process	6	0.11058	102189645	VAV3
GO:0009314	response to radiation	biological_process	5	0.11058	102185968	DCUN1D3
GO:0010608	posttranscriptional regulation of gene expression	biological_process	8	0.11058	106503653	LOC106503653
GO:0051924	regulation of calcium ion transport	biological_process	9	0.11058	102179639	BEST1
GO:0051928	positive regulation of calcium ion transport	biological_process	9	0.11058	102182803	CACNB2
GO:0060384	innervation	biological_process	4	0.11058	102181070	NTF4
GO:0070509	calcium ion import	biological_process	11	0.11058	102182803	CACNB2
GO:0030276	clathrin binding	molecular_function	5	0.110651	102172019;102189927;	LOC102172019;DOC2A;
GO:0009952	anterior/posterior pattern specification	biological_process	6	0.113168	102177693;102178142;	HOXC11;GLI3;
GO:0020037	heme binding	molecular_function	6	0.113735	100860905;102184252;102191082;	PTGS2;LOC102184252;STC2;
GO:0001824	blastocyst development	biological_process	5	0.117504	102171737	ETV2
GO:0019369	arachidonic acid metabolic process	biological_process	11	0.117504	102184252	LOC102184252
GO:0031334	positive regulation of protein complex assembly	biological_process	7	0.117504	102185041	TPPP
GO:0036342	post-anal tail morphogenesis	biological_process	5	0.117504	106503241	HES7
GO:0051298	centrosome duplication	biological_process	5	0.117504	108635183	LOC108635183
GO:0051443	positive regulation of ubiquitin-protein transferase activity	biological_process	12	0.117504	102185968	DCUN1D3
GO:2000377	regulation of reactive oxygen species metabolic process	biological_process	7	0.117504	102184252	LOC102184252
GO:0006955	immune response	biological_process	4	0.120487	102171134;102180584;102188305;102191637;	CTSW;LOC102180584;CD70;TNFRSF18;
GO:0007169	transmembrane receptor protein tyrosine kinase signaling pathway	biological_process	7	0.120807	102181070;102182806;	NTF4;PTK6;
GO:0042493	response to drug	biological_process	5	0.123381	102177522;102189645;	VLDLR;VAV3;
GO:0045766	positive regulation of angiogenesis	biological_process	8	0.123381	102178091;102184252;	ADM;LOC102184252;
GO:0003341	cilium movement	biological_process	6	0.124374	102176355	CCDC114
GO:0004016	adenylate cyclase activity	molecular_function	5	0.124374	102185858	ADCY7
GO:0006509	membrane protein ectodomain proteolysis	biological_process	9	0.124374	102178403	DAG1
GO:0006805	xenobiotic metabolic process	biological_process	5	0.124374	102184252	LOC102184252
GO:0007130	synaptonemal complex assembly	biological_process	6	0.124374	102188974	MEIOC
GO:0008307	structural constituent of muscle	molecular_function	4	0.124374	102178403	DAG1
GO:0008601	protein phosphatase type 2A regulator activity	molecular_function	NA	0.124374	106503653	LOC106503653
GO:0030863	cortical cytoskeleton	cellular_component	7	0.124374	102187803	DLG4
GO:0048010	vascular endothelial growth factor receptor signaling pathway	biological_process	8	0.124374	106501749	FOXC2
GO:0048169	regulation of long-term neuronal synaptic plasticity	biological_process	11	0.124374	102187803	DLG4
GO:0048709	oligodendrocyte differentiation	biological_process	7	0.124374	102178142	GLI3
GO:0051020	GTPase binding	molecular_function	6	0.124374	102169841	GNB3
GO:0071542	dopaminergic neuron differentiation	biological_process	7	0.124374	102180913	PITX3
GO:0042127	regulation of cell proliferation	biological_process	6	0.12557	102179524;102182806;102191637;	EGLN3;PTK6;TNFRSF18;
GO:0043065	positive regulation of apoptotic process	biological_process	9	0.12557	102178036;102184252;102185968;	BNIP3;LOC102184252;DCUN1D3;
GO:0023019	signal transduction involved in regulation of gene expression	biological_process	5	0.131191	102171226	FGF5
GO:0030010	establishment of cell polarity	biological_process	5	0.131191	102178709	BRSK2
GO:0030099	myeloid cell differentiation	biological_process	6	0.131191	102181435	THPO
GO:0030318	melanocyte differentiation	biological_process	7	0.131191	102178142	GLI3
GO:0030705	cytoskeleton-dependent intracellular transport	biological_process	7	0.131191	102174633	KIF5A
GO:0035035	histone acetyltransferase binding	molecular_function	6	0.131191	102178142	GLI3
GO:0051781	positive regulation of cell division	biological_process	7	0.131191	102171226	FGF5
GO:2000463	positive regulation of excitatory postsynaptic potential	biological_process	9	0.131191	102187803	DLG4
GO:0034765	regulation of ion transmembrane transport	biological_process	8	0.133808	102170924;102177287;	KCNJ9;TMEM37;
GO:0030425	dendrite	cellular_component	6	0.136051	102168594;102169841;	AMIGO1;GNB3;
GO:0030308	negative regulation of cell growth	biological_process	7	0.136445	102185968;102191092;	DCUN1D3;CDA;
GO:0002076	osteoblast development	biological_process	6	0.137956	100860907	PTHLH
GO:0005244	voltage-gated ion channel activity	molecular_function	9	0.137956	102177287	TMEM37
GO:0005977	glycogen metabolic process	biological_process	9	0.137956	102172686	PPP1R3C
GO:0006607	NLS-bearing protein import into nucleus	biological_process	12	0.137956	102178403	DAG1
GO:0007093	mitotic cell cycle checkpoint	biological_process	5	0.137956	102184896	WNT9A
GO:0010575	positive regulation of vascular endothelial growth factor production	biological_process	8	0.137956	102184252	LOC102184252
GO:0016712	oxidoreductase activity, acting on paired donors, with incorporation or reduction of molecular oxygen, reduced flavin or flavoprotein as one donor, and incorporation of one atom of oxygen	molecular_function	6	0.137956	102184252	LOC102184252
GO:0032728	positive regulation of interferon-beta production	biological_process	9	0.137956	106503773	IRF7
GO:0042572	retinol metabolic process	biological_process	11	0.137956	102184252	LOC102184252
GO:0045296	cadherin binding	molecular_function	6	0.137956	102168471	NDRG1
GO:0045597	positive regulation of cell differentiation	biological_process	7	0.137956	102184896	WNT9A
GO:0071108	protein K48-linked deubiquitination	biological_process	10	0.137956	108635183	LOC108635183
GO:0000166	nucleotide binding	molecular_function	5	0.142829	102169571;102171331;102178709;102184427;102186419;	CPEB2;SRSF6;BRSK2;LOC102184427;TARDBP;
GO:0007214	gamma-aminobutyric acid signaling pathway	biological_process	6	0.144668	102183272	PLCL2
GO:0015035	protein disulfide oxidoreductase activity	molecular_function	7	0.144668	102177676	TXNDC2
GO:0030215	semaphorin receptor binding	molecular_function	6	0.144668	102171324	SEMA6B
GO:0031418	L-ascorbic acid binding	molecular_function	6	0.144668	102179524	EGLN3
GO:0034047	regulation of protein phosphatase type 2A activity	biological_process	NA	0.144668	106503653	LOC106503653
GO:0045773	positive regulation of axon extension	biological_process	8	0.144668	102177680	LIMK1
GO:0048167	regulation of synaptic plasticity	biological_process	9	0.144668	102173853	ITPKA
GO:0090103	cochlea morphogenesis	biological_process	6	0.144668	102188440	FZD2
GO:2000134	negative regulation of G1/S transition of mitotic cell cycle	biological_process	10	0.144668	102191231	KANK2
GO:0008283	cell proliferation	biological_process	3	0.146823	102181435;102188305;	THPO;CD70;
GO:0042593	glucose homeostasis	biological_process	8	0.149798	102178968	GPRC5B
GO:0000159	protein phosphatase type 2A complex	cellular_component	5	0.151328	106503653	LOC106503653
GO:0001205	transcriptional activator activity, RNA polymerase II distal enhancer sequence-specific binding	molecular_function	NA	0.151328	102186419	TARDBP
GO:0005261	cation channel activity	molecular_function	7	0.151328	102185724	CACNA1I
GO:0005922	connexon complex	cellular_component	6	0.151328	102185801	GJB3
GO:0046513	ceramide biosynthetic process	biological_process	10	0.151328	102179052	DEGS2
GO:0048511	rhythmic process	biological_process	3	0.151328	106503241	HES7
GO:0050796	regulation of insulin secretion	biological_process	10	0.151328	102182306	RFX3
GO:0055010	ventricular cardiac muscle tissue morphogenesis	biological_process	8	0.151328	106501749	FOXC2
GO:0070536	protein K63-linked deubiquitination	biological_process	10	0.151328	108635183	LOC108635183
GO:0034220	ion transmembrane transport	biological_process	7	0.155211	102185724;102187803;	CACNA1I;DLG4;
GO:0090090	negative regulation of canonical Wnt signaling pathway	biological_process	10	0.157932	102176310;102178142;	WNT5B;GLI3;
GO:0010332	response to gamma radiation	biological_process	7	0.157937	102185968	DCUN1D3
GO:0031295	T cell costimulation	biological_process	5	0.157937	102169974	EFNB2
GO:0035567	non-canonical Wnt signaling pathway	biological_process	8	0.157937	102188440	FZD2
GO:0043015	gamma-tubulin binding	molecular_function	7	0.157937	102168471	NDRG1
GO:0001569	patterning of blood vessels	biological_process	7	0.164495	106501749	FOXC2
GO:0001974	blood vessel remodeling	biological_process	5	0.164495	106501749	FOXC2
GO:0005088	Ras guanyl-nucleotide exchange factor activity	molecular_function	8	0.164495	102187803	DLG4
GO:0005104	fibroblast growth factor receptor binding	molecular_function	7	0.164495	102171226	FGF5
GO:0005164	tumor necrosis factor receptor binding	molecular_function	8	0.164495	102188305	CD70
GO:0015171	amino acid transmembrane transporter activity	molecular_function	7	0.164495	102190298	SLC38A4
GO:0030295	protein kinase activator activity	molecular_function	7	0.164495	102178968	GPRC5B
GO:0034097	response to cytokine	biological_process	6	0.164495	102190818	TMEM102
GO:0048843	negative regulation of axon extension involved in axon guidance	biological_process	9	0.164495	102171324	SEMA6B
GO:0000982	transcription factor activity, RNA polymerase II core promoter proximal region sequence-specific binding	molecular_function	NA	0.171001	106503773	IRF7
GO:0001578	microtubule bundle formation	biological_process	8	0.171001	102185041	TPPP
GO:0002474	antigen processing and presentation of peptide antigen via MHC class I	biological_process	6	0.171001	102180584	LOC102180584
GO:0005154	epidermal growth factor receptor binding	molecular_function	7	0.171001	102189645	VAV3
GO:0034260	negative regulation of GTPase activity	biological_process	8	0.171001	102169571	CPEB2
GO:0034707	chloride channel complex	cellular_component	7	0.171001	102179639	BEST1
GO:0042612	MHC class I protein complex	cellular_component	7	0.171001	102180584	LOC102180584
GO:0043552	positive regulation of phosphatidylinositol 3-kinase activity	biological_process	10	0.171001	102189645	VAV3
GO:0050829	defense response to Gram-negative bacterium	biological_process	9	0.171001	102178091	ADM
GO:0061098	positive regulation of protein tyrosine kinase activity	biological_process	12	0.171001	102178968	GPRC5B
GO:0070059	intrinsic apoptotic signaling pathway in response to endoplasmic reticulum stress	biological_process	7	0.171001	102178709	BRSK2
GO:1900026	positive regulation of substrate adhesion-dependent cell spreading	biological_process	10	0.171001	102180469	TRIOBP
GO:0003676	nucleic acid binding	molecular_function	5	0.172074	102169571;102174774;102186419;102186607;106502052;	CPEB2;THAP8;TARDBP;ZNF438;ZNF775;
GO:0006915	apoptotic process	biological_process	6	0.176805	102178709;102190818;102191231;	BRSK2;TMEM102;KANK2;
GO:0007528	neuromuscular junction development	biological_process	6	0.177458	102182803	CACNB2
GO:0042813	Wnt-activated receptor activity	molecular_function	6	0.177458	102188440	FZD2
GO:0051015	actin filament binding	molecular_function	7	0.182787	102180469;102188225;	TRIOBP;SPTB;
GO:0005547	phosphatidylinositol-3,4,5-trisphosphate binding	molecular_function	8	0.183864	102188250	ADAP2
GO:0005844	polysome	cellular_component	5	0.183864	102169571	CPEB2
GO:0005891	voltage-gated calcium channel complex	cellular_component	9	0.183864	102182803	CACNB2
GO:0010107	potassium ion import	biological_process	NA	0.183864	102170924	KCNJ9
GO:0031624	ubiquitin conjugating enzyme binding	molecular_function	7	0.183864	102185968	DCUN1D3
GO:0035115	embryonic forelimb morphogenesis	biological_process	8	0.183864	102184896	WNT9A
GO:0042149	cellular response to glucose starvation	biological_process	9	0.183864	102177522	VLDLR
GO:0042605	peptide antigen binding	molecular_function	5	0.183864	102180584	LOC102180584
GO:0045499	chemorepellent activity	molecular_function	7	0.183864	102171324	SEMA6B
GO:0071526	semaphorin-plexin signaling pathway	biological_process	6	0.183864	102171324	SEMA6B
GO:0042169	SH2 domain binding	molecular_function	6	0.190221	102178403	DAG1
GO:0050661	NADP binding	molecular_function	6	0.190221	102181330	GAPDHS
GO:0097191	extrinsic apoptotic signaling pathway	biological_process	6	0.190221	102188305	CD70
GO:0005886	plasma membrane	cellular_component	4	0.193797	102168471;102169974;102170104;102170686;102172019;102177522;102178126;102178227;102178968;102178972;102180584;102183457;102184780;102185724;102185858;102185968;102187803;102188250;102188305;102188440;102188601;102189645;102189927;102190818;	NDRG1;EFNB2;SLC9A3R2;ARRDC2;LOC102172019;VLDLR;EFNA4;CDC42SE1;GPRC5B;PLCE1;LOC102180584;RGMA;GPR85;CACNA1I;ADCY7;DCUN1D3;DLG4;ADAP2;CD70;FZD2;PLEKHH2;VAV3;DOC2A;TMEM102;
GO:0016323	basolateral plasma membrane	cellular_component	5	0.194013	102179639;102187803;	BEST1;DLG4;
GO:0042802	identical protein binding	molecular_function	5	0.196298	102177651;102182806;102186419;102188601;106501749;	FHOD1;PTK6;TARDBP;PLEKHH2;FOXC2;
GO:0007189	adenylate cyclase-activating G-protein coupled receptor signaling pathway	biological_process	8	0.196529	100860907	PTHLH
GO:0008544	epidermis development	biological_process	6	0.196529	102181070	NTF4
GO:0030890	positive regulation of B cell proliferation	biological_process	11	0.196529	102189645	VAV3
GO:0032956	regulation of actin cytoskeleton organization	biological_process	7	0.196529	102180469	TRIOBP
GO:0045859	regulation of protein kinase activity	biological_process	10	0.196529	106503653	LOC106503653
GO:0045880	positive regulation of smoothened signaling pathway	biological_process	9	0.196529	102184896	WNT9A
GO:0048666	neuron development	biological_process	6	0.196529	102180913	PITX3
GO:0050919	negative chemotaxis	biological_process	6	0.196529	102171324	SEMA6B
GO:0005801	cis-Golgi network	cellular_component	6	0.202788	100861132	RAB30
GO:0031072	heat shock protein binding	molecular_function	5	0.202788	102177680	LIMK1
GO:0042552	myelination	biological_process	6	0.202788	102168594	AMIGO1
GO:0045335	phagocytic vesicle	cellular_component	8	0.202788	102189974	RAB39A
GO:2000369	regulation of clathrin-mediated endocytosis	biological_process	9	0.202788	102172019	LOC102172019
GO:0019901	protein kinase binding	molecular_function	7	0.207624	102178709;102178968;106503653;	BRSK2;GPRC5B;LOC106503653;
GO:0001657	ureteric bud development	biological_process	7	0.208998	106501749	FOXC2
GO:0003333	amino acid transmembrane transport	biological_process	11	0.208998	102190298	SLC38A4
GO:0006909	phagocytosis	biological_process	7	0.208998	102178227	CDC42SE1
GO:0030032	lamellipodium assembly	biological_process	8	0.208998	102189645	VAV3
GO:0030901	midbrain development	biological_process	5	0.208998	102180913	PITX3
GO:0050853	B cell receptor signaling pathway	biological_process	8	0.208998	102189645	VAV3
GO:0051879	Hsp90 protein binding	molecular_function	6	0.208998	106503653	LOC106503653
GO:0055038	recycling endosome membrane	cellular_component	9	0.208998	102168471	NDRG1
GO:0007155	cell adhesion	biological_process	4	0.210315	102168594;102169974;	AMIGO1;EFNB2;
GO:0030027	lamellipodium	cellular_component	6	0.211009	102178403;102188601;	DAG1;PLEKHH2;
GO:0035556	intracellular signal transduction	biological_process	5	0.212477	102178709;102183272;102184280;102185858;	BRSK2;PLCL2;WNK4;ADCY7;
GO:0015459	potassium channel regulator activity	molecular_function	6	0.21516	102168594	AMIGO1
GO:0030218	erythrocyte differentiation	biological_process	7	0.21516	102171737	ETV2
GO:0045184	establishment of protein localization	biological_process	6	0.21516	102187803	DLG4
GO:0048813	dendrite morphogenesis	biological_process	9	0.21516	102177522	VLDLR
GO:0070301	cellular response to hydrogen peroxide	biological_process	8	0.21516	102184252	LOC102184252
GO:0086010	membrane depolarization during action potential	biological_process	7	0.21516	102185724	CACNA1I
GO:0043547	positive regulation of GTPase activity	biological_process	8	0.215507	102168443;102178972;102187803;102188250;102189645;	RGL3;PLCE1;DLG4;ADAP2;VAV3;
GO:0003151	outflow tract morphogenesis	biological_process	5	0.221275	102188440	FZD2
GO:0005031	tumor necrosis factor-activated receptor activity	molecular_function	7	0.221275	102191637	TNFRSF18
GO:0030864	cortical actin cytoskeleton	cellular_component	8	0.221275	102188601	PLEKHH2
GO:0030968	endoplasmic reticulum unfolded protein response	biological_process	5	0.221275	102191082	STC2
GO:0043022	ribosome binding	molecular_function	6	0.221275	102169571	CPEB2
GO:0051898	negative regulation of protein kinase B signaling	biological_process	10	0.221275	102178403	DAG1
GO:0006096	glycolytic process	biological_process	10	0.227342	102181330	GAPDHS
GO:0032580	Golgi cisterna membrane	cellular_component	8	0.227342	102188023	LOC102188023
GO:0032947	protein complex scaffold	molecular_function	NA	0.227342	102170104	SLC9A3R2
GO:0048268	clathrin coat assembly	biological_process	8	0.227342	102172019	LOC102172019
GO:0060348	bone development	biological_process	6	0.227342	102179902	TRIM45
GO:0007067	mitotic nuclear division	biological_process	NA	0.231012	102178709	BRSK2
GO:0017158	regulation of calcium ion-dependent exocytosis	biological_process	9	0.233362	102189927	DOC2A
GO:0035176	social behavior	biological_process	5	0.233362	102187803	DLG4
GO:0051287	NAD binding	molecular_function	6	0.233362	102181330	GAPDHS
GO:0016310	phosphorylation	biological_process	7	0.233881	102173853;102178709;	ITPKA;BRSK2;
GO:0055114	oxidation-reduction process	biological_process	4	0.234073	102177676;102179052;102179524;102181330;102184252;102186611;	TXNDC2;DEGS2;EGLN3;GAPDHS;LOC102184252;LOC102186611;
GO:0005102	receptor binding	molecular_function	5	0.236812	102170104;102182806;102188305;	SLC9A3R2;PTK6;CD70;
GO:0005545	1-phosphatidylinositol binding	molecular_function	7	0.239336	102172019	LOC102172019
GO:0006006	glucose metabolic process	biological_process	8	0.239336	102181330	GAPDHS
GO:0008217	regulation of blood pressure	biological_process	5	0.239336	100860905	PTGS2
GO:0009267	cellular response to starvation	biological_process	8	0.239336	108635183	LOC108635183
GO:0045600	positive regulation of fat cell differentiation	biological_process	8	0.239336	102176310	WNT5B
GO:0045860	positive regulation of protein kinase activity	biological_process	11	0.239336	102177522	VLDLR
GO:0051603	proteolysis involved in cellular protein catabolic process	biological_process	8	0.239336	102171134	CTSW
GO:0071300	cellular response to retinoic acid	biological_process	7	0.239336	102182806	PTK6
GO:0071407	cellular response to organic cyclic compound	biological_process	7	0.239336	102184252	LOC102184252
GO:0072372	primary cilium	cellular_component	NA	0.239336	102178142	GLI3
GO:0031625	ubiquitin protein ligase binding	molecular_function	7	0.245083	102168382;102172562;102180469;	LOC102168382;PRR5L;TRIOBP;
GO:0000086	G2/M transition of mitotic cell cycle	biological_process	7	0.245263	102178709	BRSK2
GO:0005913	cell-cell adherens junction	cellular_component	5	0.245263	102168471	NDRG1
GO:0006417	regulation of translation	biological_process	9	0.245263	102169571	CPEB2
GO:0007200	phospholipase C-activating G-protein coupled receptor signaling pathway	biological_process	6	0.245263	102178972	PLCE1
GO:0009636	response to toxic substance	biological_process	5	0.245263	102184252	LOC102184252
GO:0010506	regulation of autophagy	biological_process	8	0.245263	108635183	LOC108635183
GO:0016592	mediator complex	cellular_component	4	0.245263	102178142	GLI3
GO:0019902	phosphatase binding	molecular_function	6	0.245263	102170104	SLC9A3R2
GO:0032147	activation of protein kinase activity	biological_process	12	0.245263	102178968	GPRC5B
GO:0046426	negative regulation of JAK-STAT cascade	biological_process	10	0.245263	102171839	LRRC4
GO:0008083	growth factor activity	molecular_function	7	0.245376	102171226;102181070;	FGF5;NTF4;
GO:0045121	membrane raft	cellular_component	6	0.245376	102178403;102178968;	DAG1;GPRC5B;
GO:0030335	positive regulation of cell migration	biological_process	8	0.248254	102171324;102176310;	SEMA6B;WNT5B;
GO:0043209	myelin sheath	cellular_component	4	0.248254	102168471;102185041;	NDRG1;TPPP;
GO:0001503	ossification	biological_process	4	0.251145	106501749	FOXC2
GO:0004497	monooxygenase activity	molecular_function	5	0.251145	102184252	LOC102184252
GO:0008286	insulin receptor signaling pathway	biological_process	8	0.251145	106501749	FOXC2
GO:0038083	peptidyl-tyrosine autophosphorylation	biological_process	11	0.251145	102182806	PTK6
GO:0044297	cell body	cellular_component	4	0.251145	108635183	LOC108635183
GO:0048791	calcium ion-regulated exocytosis of neurotransmitter	biological_process	10	0.251145	102189927	DOC2A
GO:0050729	positive regulation of inflammatory response	biological_process	9	0.251145	102178968	GPRC5B
GO:0001658	branching involved in ureteric bud morphogenesis	biological_process	7	0.256981	102178142	GLI3
GO:0003705	transcription factor activity, RNA polymerase II distal enhancer sequence-specific binding	molecular_function	NA	0.256981	106501749	FOXC2
GO:0005776	autophagosome	cellular_component	7	0.256981	108635183	LOC108635183
GO:0030175	filopodium	cellular_component	7	0.256981	102178403	DAG1
GO:0005856	cytoskeleton	cellular_component	6	0.259665	102178227;102178709;	CDC42SE1;BRSK2;
GO:0004672	protein kinase activity	molecular_function	7	0.262656	102177680;102178709;	LIMK1;BRSK2;
GO:0009887	organ morphogenesis	biological_process	5	0.262771	102169974	EFNB2
GO:0017053	transcriptional repressor complex	cellular_component	4	0.262771	102178142	GLI3
GO:0031966	mitochondrial membrane	cellular_component	5	0.262771	102171335	CARD19
GO:0097110	scaffold protein binding	molecular_function	5	0.262771	102187803	DLG4
GO:0003779	actin binding	molecular_function	6	0.263853	102177651;102178403;102188601;
GO:0043010	camera-type eye development	biological_process	8	0.268517	106501749	FOXC2
GO:0004715	non-membrane spanning protein tyrosine kinase activity	molecular_function	9	0.274218	102182806	PTK6
GO:0006302	double-strand break repair	biological_process	9	0.274218	102188974	MEIOC
GO:0006461	protein complex assembly	biological_process	NA	0.274218	102187803	DLG4
GO:0007368	determination of left/right symmetry	biological_process	7	0.274218	102187159	DNAAF3
GO:0008543	fibroblast growth factor receptor signaling pathway	biological_process	8	0.274218	102171226	FGF5
GO:0008625	extrinsic apoptotic signaling pathway via death domain receptors	biological_process	7	0.274218	102191637	TNFRSF18
GO:0021766	hippocampus development	biological_process	5	0.274218	102178142	GLI3
GO:0021987	cerebral cortex development	biological_process	5	0.274218	102177522	VLDLR
GO:0008022	protein C-terminus binding	molecular_function	5	0.277064	102170104;102187803;	SLC9A3R2;DLG4;
GO:0002062	chondrocyte differentiation	biological_process	6	0.279876	102176310	WNT5B
GO:0016568	chromatin modification	biological_process	NA	0.279876	102191360	BANP
GO:0045171	intercellular bridge	cellular_component	4	0.279876	102179902	TRIM45
GO:0048306	calcium-dependent protein binding	molecular_function	5	0.279876	102177522	VLDLR
GO:0046983	protein dimerization activity	molecular_function	5	0.282824	102173156;106503241;	MXI1;HES7;
GO:0001570	vasculogenesis	biological_process	6	0.285489	102178091	ADM
GO:0014068	positive regulation of phosphatidylinositol 3-kinase signaling	biological_process	10	0.285489	102172562	PRR5L
GO:0031532	actin cytoskeleton reorganization	biological_process	8	0.285489	102178709	BRSK2
GO:0045202	synapse	cellular_component	3	0.28858	102169571;102187803;	CPEB2;DLG4;
GO:0008104	protein localization	biological_process	5	0.291059	102174633	KIF5A
GO:0032091	negative regulation of protein binding	biological_process	7	0.291059	108635183	LOC108635183
GO:0004860	protein kinase inhibitor activity	molecular_function	7	0.296585	102171839	LRRC4
GO:0006351	transcription, DNA-templated	biological_process	8	0.297385	102173156;102182306;102185425;102191231;102191360;106503241;	MXI1;RFX3;FOXO6;KANK2;BANP;HES7;
GO:0008344	adult locomotory behavior	biological_process	5	0.302069	102181070	NTF4
GO:0019005	SCF ubiquitin ligase complex	cellular_component	7	0.302069	102181150	FBXO17
GO:0051289	protein homotetramerization	biological_process	9	0.302069	102191092	CDA
GO:0001755	neural crest cell migration	biological_process	8	0.307511	102171324	SEMA6B
GO:0031490	chromatin DNA binding	molecular_function	7	0.307511	106501749	FOXC2
GO:0042475	odontogenesis of dentin-containing tooth	biological_process	7	0.307511	102178142	GLI3
GO:0045669	positive regulation of osteoblast differentiation	biological_process	8	0.307511	102178142	GLI3
GO:0071347	cellular response to interleukin-1	biological_process	8	0.307511	102177522	VLDLR
GO:0004871	signal transducer activity	molecular_function	NA	0.311543	102178972;102183272;	PLCE1;PLCL2;
GO:0000187	activation of MAPK activity	biological_process	13	0.31291	102178972	PLCE1
GO:0005543	phospholipid binding	molecular_function	5	0.31291	102188225	SPTB
GO:0000979	RNA polymerase II core promoter sequence-specific DNA binding	molecular_function	10	0.318267	106503773	IRF7
GO:0001725	stress fiber	cellular_component	7	0.318267	102177651	FHOD1
GO:0006816	calcium ion transport	biological_process	10	0.318267	102185724	CACNA1I
GO:0016740	transferase activity	molecular_function	4	0.318267	102178709	BRSK2
GO:0030593	neutrophil chemotaxis	biological_process	7	0.318267	102189645	VAV3
GO:0051965	positive regulation of synapse assembly	biological_process	7	0.318267	102168594	AMIGO1
GO:0051897	positive regulation of protein kinase B signaling	biological_process	10	0.323583	102181435	THPO
GO:0046872	metal ion binding	molecular_function	6	0.325331	102178142;102178709;102178726;102182155;102185379;102186607;102189645;102189791;106502052;	GLI3;BRSK2;ZNF395;YPEL4;PLAG1;ZNF438;VAV3;YPEL2;ZNF775;
GO:0033209	tumor necrosis factor-mediated signaling pathway	biological_process	7	0.328858	102191637	TNFRSF18
GO:0043197	dendritic spine	cellular_component	7	0.328858	102187803	DLG4
GO:0045454	cell redox homeostasis	biological_process	5	0.328858	102177676	TXNDC2
GO:0000151	ubiquitin ligase complex	cellular_component	5	0.334092	102185968	DCUN1D3
GO:0005254	chloride channel activity	molecular_function	8	0.334092	102179639	BEST1
GO:0005262	calcium channel activity	molecular_function	8	0.334092	102177287	TMEM37
GO:0006919	activation of cysteine-type endopeptidase activity involved in apoptotic process	biological_process	11	0.334092	102179524	EGLN3
GO:0007204	positive regulation of cytosolic calcium ion concentration	biological_process	13	0.334092	102187803	DLG4
GO:0050790	regulation of catalytic activity	biological_process	5	0.334092	102172686	PPP1R3C
GO:0002020	protease binding	molecular_function	6	0.339285	102188305	CD70
GO:0003823	antigen binding	molecular_function	4	0.339285	102180584	LOC102180584
GO:0005604	basement membrane	cellular_component	6	0.339285	102178403	DAG1
GO:0005085	guanyl-nucleotide exchange factor activity	molecular_function	7	0.344438	102178972	PLCE1
GO:0005544	calcium-dependent phospholipid binding	molecular_function	6	0.344438	102189927	DOC2A
GO:0030855	epithelial cell differentiation	biological_process	6	0.344438	102188440	FZD2
GO:0045177	apical part of cell	cellular_component	4	0.344438	102177522	VLDLR
GO:0051301	cell division	biological_process	4	0.345676	102178709	BRSK2
GO:0006887	exocytosis	biological_process	7	0.349551	102178709;108635183;	BRSK2;LOC108635183;
GO:0030324	lung development	biological_process	6	0.349551	102178142	GLI3
GO:0005783	endoplasmic reticulum	cellular_component	6	0.353867	102178036;102178709;102184780;102187803;102191082;102171335;102179052;	BNIP3;BRSK2;GPR85;DLG4;STC2;CARD19;DEGS2;
GO:0005506	iron ion binding	molecular_function	8	0.35413	102179524;102184252;	EGLN3;LOC102184252;
GO:0005871	kinesin complex	cellular_component	5	0.354624	102174633	KIF5A
GO:0019882	antigen processing and presentation	biological_process	4	0.354624	102180584	LOC102180584
GO:0030176	integral component of endoplasmic reticulum membrane	cellular_component	7	0.359658	102178101	LOC102178101
GO:0071222	cellular response to lipopolysaccharide	biological_process	8	0.359658	102177522	VLDLR
GO:0005525	GTP binding	molecular_function	8	0.360448	100861132;102183843;102189974;	RAB30;SRL;RAB39A;
GO:0005930	axoneme	cellular_component	6	0.364653	102178142	GLI3
GO:0008021	synaptic vesicle	cellular_component	4	0.364653	102187803	DLG4
GO:0007030	Golgi organization	biological_process	6	0.369609	100861132	RAB30
GO:0030136	clathrin-coated vesicle	cellular_component	8	0.369609	102172019	LOC102172019
GO:0005634	nucleus	cellular_component	6	0.372697	100860905;100861074;102168471;102169571;102171182;102171737;102173156;102177522;102177651;102178709;102178726;102179386;102179524;102180913;102181330;102181596;102182155;102185041;102185379;102185425;102186607;102186611;102189403;102191360;106501749;106503241;	PTGS2;ANKRD37;NDRG1;CPEB2;CENPBD1;ETV2;MXI1;VLDLR;FHOD1;BRSK2;ZNF395;STC1;EGLN3;PITX3;GAPDHS;SPAG8;YPEL4;TPPP;PLAG1;FOXO6;ZNF438;LOC102186611;SALL2;BANP;FOXC2;HES7;
GO:0016042	lipid catabolic process	biological_process	6	0.374527	102183272	PLCL2
GO:0042383	sarcolemma	cellular_component	5	0.374527	102178403	DAG1
GO:0005578	proteinaceous extracellular matrix	cellular_component	NA	0.376479	102176310;102184896;	WNT5B;WNT9A;
GO:0006979	response to oxidative stress	biological_process	5	0.379407	102191082	STC2
GO:0030509	BMP signaling pathway	biological_process	10	0.379407	102183457	RGMA
GO:0051117	ATPase binding	molecular_function	6	0.379407	102178709	BRSK2
GO:0090263	positive regulation of canonical Wnt signaling pathway	biological_process	10	0.379407	102178968	GPRC5B
GO:0006486	protein glycosylation	biological_process	9	0.384249	102176255	B3GNT9
GO:0060021	palate development	biological_process	5	0.384249	102178142	GLI3
GO:0001726	ruffle	cellular_component	6	0.39382	102182806	PTK6
GO:0005882	intermediate filament	cellular_component	7	0.39382	102181431	LOC102181431
GO:0006469	negative regulation of protein kinase activity	biological_process	11	0.39382	102171839	LRRC4
GO:0051091	positive regulation of sequence-specific DNA binding transcription factor activity	biological_process	6	0.39382	102188440	FZD2
GO:0004252	serine-type endopeptidase activity	molecular_function	8	0.395773	102173434;102175078;	RHBDL1;PRSS33;
GO:0019899	enzyme binding	molecular_function	5	0.395773	102178972;102191082;	PLCE1;STC2;
GO:0006629	lipid metabolic process	biological_process	5	0.39855	102178972	PLCE1
GO:0016301	kinase activity	molecular_function	6	0.39855	102178709	BRSK2
GO:0005739	mitochondrion	cellular_component	6	0.402637	102172562;102177676;102178036;102184252;102186611;102190818;102191231;	PRR5L;TXNDC2;BNIP3;LOC102184252;LOC102186611;TMEM102;KANK2;
GO:0003690	double-stranded DNA binding	molecular_function	7	0.403244	102186419	TARDBP
GO:0007229	integrin-mediated signaling pathway	biological_process	6	0.403244	102189645	VAV3
GO:0019905	syntaxin binding	molecular_function	6	0.417107	102189927	DOC2A
GO:0000287	magnesium ion binding	molecular_function	7	0.417487	102173632;102178709;	LOC102173632;BRSK2;
GO:0001934	positive regulation of protein phosphorylation	biological_process	10	0.421656	102172562	PRR5L
GO:0005741	mitochondrial outer membrane	cellular_component	6	0.421656	102178036	BNIP3
GO:0007018	microtubule-based movement	biological_process	5	0.421656	102174633	KIF5A
GO:0008380	RNA splicing	biological_process	10	0.421656	102186419	TARDBP
GO:0035264	multicellular organism growth	biological_process	4	0.421656	102185379	PLAG1
GO:0004843	thiol-dependent ubiquitin-specific protease activity	molecular_function	10	0.43065	108635183	LOC108635183
GO:0051726	regulation of cell cycle	biological_process	6	0.435094	102186419	TARDBP
GO:0000165	MAPK cascade	biological_process	11	0.448222	102187803	DLG4
GO:0007409	axonogenesis	biological_process	9	0.45253	102178709	BRSK2
GO:0010468	regulation of gene expression	biological_process	7	0.45253	100860907	PTHLH
GO:0016579	protein deubiquitination	biological_process	9	0.456804	108635183	LOC108635183
GO:0043234	protein complex	cellular_component	NA	0.457107	102188225;102190818;	SPTB;TMEM102;
GO:0016023	cytoplasmic, membrane-bounded vesicle	cellular_component	NA	0.461046	102181070	NTF4
GO:0006468	protein phosphorylation	biological_process	9	0.474986	102177680;102178709;102184280;	LIMK1;BRSK2;WNK4;
GO:0042826	histone deacetylase binding	molecular_function	6	0.477685	102178142	GLI3
GO:0043524	negative regulation of neuron apoptotic process	biological_process	10	0.477685	102181070	NTF4
GO:0007283	spermatogenesis	biological_process	7	0.480129	102188974	MEIOC
GO:0042742	defense response to bacterium	biological_process	8	0.481764	102184116	LOC102184116
GO:0035023	regulation of Rho protein signal transduction	biological_process	11	0.485812	102189645	VAV3
GO:1902476	chloride transmembrane transport	biological_process	10	0.489829	102179639	BEST1
GO:0005635	nuclear envelope	cellular_component	6	0.493814	102178036	BNIP3
GO:0014069	postsynaptic density	cellular_component	5	0.497768	102187803	DLG4
GO:0005887	integral component of plasma membrane	cellular_component	6	0.505829	102170924;102171324;102179639;102184116;102190298;102191637;	KCNJ9;SEMA6B;BEST1;LOC102184116;SLC38A4;TNFRSF18;
GO:0030154	cell differentiation	biological_process	5	0.507447	102171737;102182806;	ETV2;PTK6;
GO:0032496	response to lipopolysaccharide	biological_process	7	0.509447	102191637	TNFRSF18
GO:0007601	visual perception	biological_process	8	0.528316	102182803	CACNB2
GO:0005813	centrosome	cellular_component	7	0.529306	102168471;102178709;108635183;	NDRG1;BRSK2;LOC108635183;
GO:0006898	receptor-mediated endocytosis	biological_process	8	0.53566	102177522	VLDLR
GO:0043235	receptor complex	cellular_component	4	0.53566	102177522	VLDLR
GO:0031410	cytoplasmic vesicle	cellular_component	6	0.539289	102170686	ARRDC2
GO:0005802	trans-Golgi network	cellular_component	7	0.550008	100861132	RAB30
GO:0006457	protein folding	biological_process	4	0.550008	102177676	TXNDC2
GO:0008289	lipid binding	molecular_function	4	0.56048	102176547	GLTP
GO:0050821	protein stabilization	biological_process	6	0.56048	108635183	LOC108635183
GO:0005654	nucleoplasm	cellular_component	6	0.568647	100860907;102177680;102177693;102178403;102179902;102182806;102186419;102186607;106503773;108635183;	PTHLH;LIMK1;HOXC11;DAG1;TRIM45;PTK6;TARDBP;ZNF438;IRF7;LOC108635183;
GO:0005575	cellular_component	cellular_component	2	0.570218	102178688;102182155;	IQCK;YPEL4;
GO:0003677	DNA binding	molecular_function	6	0.570295	102171182;102173156;102182992;102191360;106503241;	CENPBD1;MXI1;DFFB;BANP;HES7;
GO:0018105	peptidyl-serine phosphorylation	biological_process	10	0.570709	102178709	BRSK2
GO:0005730	nucleolus	cellular_component	6	0.577085	102173156;102178968;102182992;102189791;	MXI1;GPRC5B;DFFB;YPEL2;
GO:0030246	carbohydrate binding	molecular_function	4	0.577397	102173397	LGALSL
GO:0017137	Rab GTPase binding	molecular_function	9	0.580702	102168471	NDRG1
GO:0032403	protein complex binding	molecular_function	NA	0.580702	102187803	DLG4
GO:0042787	protein ubiquitination involved in ubiquitin-dependent protein catabolic process	biological_process	NA	0.580702	102168382	LOC102168382
GO:0005911	cell-cell junction	cellular_component	4	0.583981	102178403	DAG1
GO:0042384	cilium assembly	biological_process	NA	0.599999	102182306	RFX3
GO:0003674	molecular_function	molecular_function	2	0.605292	102178688;102182155;102185968;	IQCK;YPEL4;DCUN1D3;
GO:0004674	protein serine/threonine kinase activity	molecular_function	8	0.607034	102178709;102184280;	BRSK2;WNK4;
GO:0006974	cellular response to DNA damage stimulus	biological_process	6	0.609313	102189645	VAV3
GO:0008360	regulation of cell shape	biological_process	8	0.621399	102178227	CDC42SE1
GO:0043123	positive regulation of I-kappaB kinase/NF-kappaB signaling	biological_process	10	0.621399	102178968	GPRC5B
GO:0045211	postsynaptic membrane	cellular_component	5	0.621399	102187803	DLG4
GO:0001525	angiogenesis	biological_process	5	0.624362	102184252	LOC102184252
GO:0008284	positive regulation of cell proliferation	biological_process	7	0.629435	102171226;102178091;	FGF5;ADM;
GO:0042981	regulation of apoptotic process	biological_process	8	0.630218	102191637	TNFRSF18
GO:0005794	Golgi apparatus	cellular_component	6	0.644011	100860907;102189974;102191082;108635183;	PTHLH;RAB39A;STC2;LOC108635183;
GO:0070374	positive regulation of ERK1 and ERK2 cascade	biological_process	12	0.644466	102181435	THPO
GO:0005764	lysosome	cellular_component	8	0.647249	102171134	CTSW
GO:0015629	actin cytoskeleton	cellular_component	7	0.660844	102180469	TRIOBP
GO:0006511	ubiquitin-dependent protein catabolic process	biological_process	10	0.666135	108635183	LOC108635183
GO:0019221	cytokine-mediated signaling pathway	biological_process	6	0.666135	102171839	LRRC4
GO:0000790	nuclear chromatin	cellular_component	7	0.673919	102182306	RFX3
GO:0005576	extracellular region	cellular_component	3	0.676062	102171226;102181070;102181435;102190585;	FGF5;NTF4;THPO;C28H10orf99;
GO:0005622	intracellular	cellular_component	4	0.687759	102168443;102173397;102178709;102183272;102185858;	RGL3;LGALSL;BRSK2;PLCL2;ADCY7;
GO:0003700	transcription factor activity, sequence-specific DNA binding	molecular_function	4	0.697536	102178142;102182306;102186607;102189403;	GLI3;RFX3;ZNF438;SALL2;
GO:0045892	negative regulation of transcription, DNA-templated	biological_process	9	0.699221	102182306;102186607;	RFX3;ZNF438;
GO:0006357	regulation of transcription from RNA polymerase II promoter	biological_process	9	0.700903	102171737;102185425;	ETV2;FOXO6;
GO:0009897	external side of plasma membrane	cellular_component	5	0.703289	102191637	TNFRSF18
GO:0061630	ubiquitin protein ligase activity	molecular_function	7	0.707922	102168382	LOC102168382
GO:0043025	neuronal cell body	cellular_component	5	0.710211	102174633	KIF5A
GO:0001701	in utero embryonic development	biological_process	8	0.723577	102178142	GLI3
GO:0005125	cytokine activity	molecular_function	7	0.732146	102181435	THPO
GO:0008150	biological_process	biological_process	2	0.748358	102178688;102182155;	IQCK;YPEL4;
GO:0005509	calcium ion binding	molecular_function	7	0.760001	102177522;102178403;102180118;102189927;	VLDLR;DAG1;CAPS;DOC2A;
GO:0005829	cytosol	cellular_component	6	0.773729	102173632;102178142;102178972;102184280;102191092;106503653;	LOC102173632;GLI3;PLCE1;WNK4;CDA;LOC106503653;
GO:0043231	intracellular membrane-bounded organelle	cellular_component	5	0.774764	102184252	LOC102184252
GO:0005198	structural molecule activity	molecular_function	3	0.778287	102178227	CDC42SE1
GO:0000139	Golgi membrane	cellular_component	7	0.786856	102176255	B3GNT9
GO:0005096	GTPase activator activity	molecular_function	6	0.796705	102188250	ADAP2
GO:0006954	inflammatory response	biological_process	6	0.807625	102191637	TNFRSF18
GO:0004888	transmembrane signaling receptor activity	molecular_function	5	0.849388	102184116	LOC102184116
GO:0016020	membrane	cellular_component	3	0.85448	100861132;102171134;102174633;102177522;102177651;102177680;	RAB30;CTSW;KIF5A;VLDLR;FHOD1;LIMK1;
GO:0006355	regulation of transcription, DNA-templated	biological_process	8	0.857552	102173156;102191360;	MXI1;BANP;
GO:0045087	innate immune response	biological_process	5	0.859728	102182806	PTK6
GO:0030054	cell junction	cellular_component	3	0.863016	102187803	DLG4
GO:0007608	sensory perception of smell	biological_process	8	0.871412	102188440	FZD2
GO:0043066	negative regulation of apoptotic process	biological_process	9	0.875417	102178142	GLI3
GO:0070062	extracellular exosome	cellular_component	7	0.881715	102168471;102169841;102170104;102176310;102178403;102178968;102179344;102184896;102188305;102189645;106503653;108634623;	NDRG1;GNB3;SLC9A3R2;WNT5B;DAG1;GPRC5B;VPS37D;WNT9A;CD70;VAV3;LOC106503653;PSCA;
GO:0005743	mitochondrial inner membrane	cellular_component	6	0.886701	102173434	RHBDL1
GO:0003682	chromatin binding	molecular_function	4	0.899389	102178142	GLI3
GO:0003723	RNA binding	molecular_function	6	0.911368	102169571	CPEB2
GO:0042803	protein homodimerization activity	molecular_function	6	0.929672	102191082;102191092;	STC2;CDA;
GO:0008270	zinc ion binding	molecular_function	8	0.932715	102177680;102179902;102191092;108635183;	LIMK1;TRIM45;CDA;LOC108635183;
GO:0046982	protein heterodimerization activity	molecular_function	6	0.938474	102177680	LIMK1
GO:0006508	proteolysis	biological_process	7	0.959959	102175078	PRSS33
GO:0044822	poly(A) RNA binding	molecular_function	NA	0.97744	102169571;102171331;102184427;	CPEB2;SRSF6;LOC102184427;
GO:0005524	ATP binding	molecular_function	5	0.9825	102174633;102177680;102178709;102182806;106503176;	KIF5A;LIMK1;BRSK2;PTK6;LOC106503176;
GO:0016021	integral component of membrane	cellular_component	5	0.984459	102169974;102171335;102173434;102176255;102177287;102177522;102178036;102178403;102178709;102178968;102179052;102180584;102184252;102184780;102185801;102186427;102186611;102188023;102188305;102188440;102190818;102191098;	EFNB2;CARD19;RHBDL1;B3GNT9;TMEM37;VLDLR;BNIP3;DAG1;BRSK2;GPRC5B;DEGS2;LOC102180584;LOC102184252;GPR85;GJB3;NKPD1;LOC102186611;LOC102188023;CD70;FZD2;TMEM102;PRRT2;
GO:0004930	G-protein coupled receptor activity	molecular_function	6	0.993891	102178968;102184780;102188440;	GPRC5B;GPR85;FZD2;
GO:0007186	G-protein coupled receptor signaling pathway	biological_process	5	0.99882	102178968;102184780;102188440;	GPRC5B;GPR85;FZD2;
