# Supplementary material for: The mRNA and miRNA profiles of goat bronchial epithelial cells stimulated by Pasteurella multocida strains of serotype A and D
Source: PeerJ. 2022 Mar 18;10:e13047. doi: 10.7717/peerj.13047 (PMC8935994; doi:10.7717/peerj.13047)
Supplement: Table S9 [file peerj-10-13047-s009.xlsx]

## Sheet: Sheet1
GO enrichment analysis of specific differentially expressed genes in the P. multocida strain serotype D -stimulated group
GO_ID	GO_Term	GO_function	GO_class	p-value	Gene_ID	Gene_name
GO:0071889	14-3-3 protein binding	molecular_function	5	0.000390119	102183627	ZFP36
GO:0042594	response to starvation	biological_process	5	0.000837981	102183627;102183734;	ZFP36;GCG;
GO:0005112	Notch binding	molecular_function	6	0.00128087	102172910;102185060;	EGFL7;C27H8orf4;
GO:0005575	cellular_component	cellular_component	2	0.00139868	102169001;102185574;102189677;102189824;108635081;	PLAC8L1;FBXO41;SHC3;FAM45A;LOC108635081;
GO:0045746	negative regulation of Notch signaling pathway	biological_process	9	0.00243397	102172910;102185060;	EGFL7;C27H8orf4;
GO:0002264	endothelial cell activation involved in immune response	biological_process	6	0.00334081	102185060	C27H8orf4
GO:0031769	glucagon receptor binding	molecular_function	7	0.00334081	102183734	GCG
GO:0070782	phosphatidylserine exposure on apoptotic cell surface	biological_process	8	0.00334081	102183468	XKR8
GO:0071228	cellular response to tumor cell	biological_process	6	0.00334081	102183379	TXNIP
GO:0097066	response to thyroid hormone	biological_process	6	0.00334081	102188889	HPN
GO:1902806	regulation of cell cycle G1/S phase transition	biological_process	9	0.00334081	102185060	C27H8orf4
GO:1903706	regulation of hemopoiesis	biological_process	6	0.00334081	102185060	C27H8orf4
GO:0010310	regulation of hydrogen peroxide metabolic process	biological_process	8	0.00667062	102173284	NOXA1
GO:0031095	platelet dense tubular network membrane	cellular_component	5	0.00667062	108637540	LOC108637540
GO:0034769	basement membrane disassembly	biological_process	6	0.00667062	102188889	HPN
GO:0050828	regulation of liquid surface tension	biological_process	6	0.00667062	102174906	SFTPD
GO:0003674	molecular_function	molecular_function	2	0.00717116	102169001;102185574;102189824;108635081;108635404;	PLAC8L1;FBXO41;FAM45A;LOC108635081;LOC108635404;
GO:0005250	A-type (transient outward) potassium channel activity	molecular_function	11	0.00998946	102186826	KCNIP2
GO:0008228	opsonization	biological_process	5	0.00998946	102174906	SFTPD
GO:0016176	superoxide-generating NADPH oxidase activator activity	molecular_function	6	0.00998946	102173284	NOXA1
GO:0019249	lactate biosynthetic process	biological_process	10	0.00998946	102183734	GCG
GO:0032680	regulation of tumor necrosis factor production	biological_process	8	0.00998946	102183627	ZFP36
GO:0043620	regulation of DNA-templated transcription in response to stress	biological_process	9	0.00998946	102185060	C27H8orf4
GO:0045163	clustering of voltage-gated potassium channels	biological_process	7	0.00998946	102186826	KCNIP2
GO:0060263	regulation of respiratory burst	biological_process	6	0.00998946	102173284	NOXA1
GO:0070008	serine-type exopeptidase activity	molecular_function	7	0.00998946	102188889	HPN
GO:0097195	pilomotor reflex	biological_process	6	0.00998946	102188889	HPN
GO:2000347	positive regulation of hepatocyte proliferation	biological_process	9	0.00998946	102188889	HPN
GO:2000611	positive regulation of thyroid hormone generation	biological_process	8	0.00998946	102188889	HPN
GO:0005811	lipid particle	cellular_component	6	0.0112394	108637540	LOC108637540
GO:0031468	nuclear envelope reassembly	biological_process	7	0.0132974	102172817	UBXN2A
GO:2001137	positive regulation of endocytic recycling	biological_process	9	0.0132974	108637540	LOC108637540
GO:0000375	RNA splicing, via transesterification reactions	biological_process	11	0.0165944	108637994	SRRM5
GO:0010756	positive regulation of plasminogen activation	biological_process	11	0.0165944	102188889	HPN
GO:0010886	positive regulation of cholesterol storage	biological_process	7	0.0165944	108637540	LOC108637540
GO:0042589	zymogen granule membrane	cellular_component	8	0.0165944	102174396	SCAMP1
GO:0043652	engulfment of apoptotic cell	biological_process	9	0.0165944	102183468	XKR8
GO:0048029	monosaccharide binding	molecular_function	5	0.0165944	102174906	SFTPD
GO:0050765	negative regulation of phagocytosis	biological_process	8	0.0165944	102174906	SFTPD
GO:0086009	membrane repolarization	biological_process	8	0.0165944	102186826	KCNIP2
GO:0004689	phosphorylase kinase activity	molecular_function	10	0.0198805	102185139	PHKG1
GO:0005964	phosphorylase kinase complex	cellular_component	6	0.0198805	102185139	PHKG1
GO:0010737	protein kinase A signaling	biological_process	6	0.0198805	102183734	GCG
GO:0032703	negative regulation of interleukin-2 production	biological_process	8	0.0198805	102174906	SFTPD
GO:0033130	acetylcholine receptor binding	molecular_function	6	0.0198805	102172817	UBXN2A
GO:0034383	low-density lipoprotein particle clearance	biological_process	5	0.0198805	108637540	LOC108637540
GO:0050700	CARD domain binding	molecular_function	6	0.0198805	102174972	CARD14
GO:0071435	potassium ion export	biological_process	NA	0.0198805	102186826	KCNIP2
GO:0008150	biological_process	biological_process	2	0.0213578	102169001;102185574;102189824;108635081;	PLAC8L1;FBXO41;FAM45A;LOC108635081;
GO:0031124	mRNA 3'-end processing	biological_process	11	0.0231559	108637994	SRRM5
GO:0043020	NADPH oxidase complex	cellular_component	6	0.0231559	102173284	NOXA1
GO:0043129	surfactant homeostasis	biological_process	9	0.0231559	102174906	SFTPD
GO:0045722	positive regulation of gluconeogenesis	biological_process	11	0.0231559	102183734	GCG
GO:0051782	negative regulation of cell division	biological_process	7	0.0231559	102183379	TXNIP
GO:0043457	regulation of cellular respiration	biological_process	8	0.0264204	108635404	LOC108635404
GO:1900153	positive regulation of nuclear-transcribed mRNA catabolic process, deadenylation-dependent decay	biological_process	10	0.0264204	102183627	ZFP36
GO:0002376	immune system process	biological_process	3	0.0296742	102174906	SFTPD
GO:0006801	superoxide metabolic process	biological_process	6	0.0296742	102173284	NOXA1
GO:0035278	miRNA mediated inhibition of translation	biological_process	12	0.0296742	102183627	ZFP36
GO:0007155	cell adhesion	biological_process	4	0.0305337	100860805;102172910;	SPP1;EGFL7;
GO:0005750	mitochondrial respiratory chain complex III	cellular_component	6	0.0329173	102173195	LOC102173195
GO:0006369	termination of RNA polymerase II transcription	biological_process	9	0.0329173	108637994	SRRM5
GO:0008121	ubiquinol-cytochrome-c reductase activity	molecular_function	6	0.0329173	102173195	LOC102173195
GO:0031396	regulation of protein ubiquitination	biological_process	10	0.0329173	102172817	UBXN2A
GO:0060213	positive regulation of nuclear-transcribed mRNA poly(A) tail shortening	biological_process	11	0.0329173	102183627	ZFP36
GO:0070935	3'-UTR-mediated mRNA stabilization	biological_process	12	0.0329173	102183627	ZFP36
GO:0006402	mRNA catabolic process	biological_process	10	0.0361497	102183627	ZFP36
GO:0034551	mitochondrial respiratory chain complex III assembly	biological_process	10	0.0361497	102173195	LOC102173195
GO:0043923	positive regulation by host of viral transcription	biological_process	10	0.0361497	102188889	HPN
GO:0045780	positive regulation of bone resorption	biological_process	9	0.0361497	100860805	SPP1
GO:0015269	calcium-activated potassium channel activity	molecular_function	9	0.0393714	102188889	HPN
GO:0031214	biomineral tissue development	biological_process	6	0.0393714	100860805	SPP1
GO:0042346	positive regulation of NF-kappaB import into nucleus	biological_process	NA	0.0393714	102185060	C27H8orf4
GO:0005525	GTP binding	molecular_function	8	0.0415085	102170348;102181771;108637540;	RHOF;LOC102181771;LOC108637540;
GO:0008610	lipid biosynthetic process	biological_process	6	0.0425825	102183734	GCG
GO:0042176	regulation of protein catabolic process	biological_process	7	0.0425825	102172817	UBXN2A
GO:1990090	cellular response to nerve growth factor stimulus	biological_process	8	0.0425825	108637540	LOC108637540
GO:0006405	RNA export from nucleus	biological_process	10	0.045783	108637994	SRRM5
GO:0050910	detection of mechanical stimulus involved in sensory perception of sound	biological_process	6	0.045783	102188889	HPN
GO:0005771	multivesicular body	cellular_component	9	0.048973	102174906	SFTPD
GO:0005978	glycogen biosynthetic process	biological_process	10	0.048973	102185139	PHKG1
GO:0008236	serine-type peptidase activity	molecular_function	6	0.048973	102188889	HPN
GO:0017091	AU-rich element binding	molecular_function	7	0.048973	102183627	ZFP36
GO:0031519	PcG protein complex	cellular_component	4	0.048973	102173827	LOC102173827
GO:0001530	lipopolysaccharide binding	molecular_function	5	0.0521525	102174906	SFTPD
GO:0005791	rough endoplasmic reticulum	cellular_component	7	0.0521525	102174906	SFTPD
GO:1901741	positive regulation of myoblast fusion	biological_process	11	0.0521525	108637540	LOC108637540
GO:0004857	enzyme inhibitor activity	molecular_function	5	0.0553215	102183379	TXNIP
GO:0010719	negative regulation of epithelial to mesenchymal transition	biological_process	8	0.0553215	102188889	HPN
GO:0007188	adenylate cyclase-modulating G-protein coupled receptor signaling pathway	biological_process	7	0.0584801	102183734	GCG
GO:0035774	positive regulation of insulin secretion involved in cellular response to glucose stimulus	biological_process	12	0.0584801	102183734	GCG
GO:0050766	positive regulation of phagocytosis	biological_process	8	0.0584801	102174906	SFTPD
GO:0061025	membrane fusion	biological_process	6	0.0584801	102172817	UBXN2A
GO:0043066	negative regulation of apoptotic process	biological_process	9	0.0590067	102174972;102183734;102188889;	CARD14;GCG;HPN;
GO:0006122	mitochondrial electron transport, ubiquinol to cytochrome c	biological_process	8	0.0616282	102173195	LOC102173195
GO:0035249	synaptic transmission, glutamatergic	biological_process	10	0.0616282	102189677	SHC3
GO:0042130	negative regulation of T cell proliferation	biological_process	11	0.0616282	102174906	SFTPD
GO:0042273	ribosomal large subunit biogenesis	biological_process	6	0.0616282	102183178	LOC102183178
GO:0045662	negative regulation of myoblast differentiation	biological_process	8	0.0616282	102185444	MBNL3
GO:0048025	negative regulation of mRNA splicing, via spliceosome	biological_process	10	0.0616282	108637994	SRRM5
GO:0007585	respiratory gaseous exchange	biological_process	4	0.064766	102174906	SFTPD
GO:0009060	aerobic respiration	biological_process	8	0.064766	102173195	LOC102173195
GO:0048008	platelet-derived growth factor receptor signaling pathway	biological_process	8	0.064766	102183379	TXNIP
GO:0050840	extracellular matrix binding	molecular_function	4	0.064766	100860805	SPP1
GO:0090103	cochlea morphogenesis	biological_process	6	0.064766	102188889	HPN
GO:0016607	nuclear speck	cellular_component	8	0.0655805	102185060;108637994;	C27H8orf4;SRRM5;
GO:0032456	endocytic recycling	biological_process	8	0.0678934	108637540	LOC108637540
GO:0005088	Ras guanyl-nucleotide exchange factor activity	molecular_function	8	0.0741174	102189677	SHC3
GO:0034605	cellular response to heat	biological_process	6	0.0741174	102185060	C27H8orf4
GO:0048020	CCR chemokine receptor binding	molecular_function	8	0.0772139	102180880	LOC102180880
GO:0007611	learning or memory	biological_process	4	0.0833765	102189677	SHC3
GO:0043484	regulation of RNA splicing	biological_process	8	0.0833765	102185444	MBNL3
GO:0046703	natural killer cell lectin-like receptor binding	molecular_function	6	0.0833765	108635459	LOC108635459
GO:0048247	lymphocyte chemotaxis	biological_process	6	0.0833765	102180880	LOC102180880
GO:0048286	lung alveolus development	biological_process	5	0.0833765	102174906	SFTPD
GO:0001568	blood vessel development	biological_process	5	0.0864426	102172910	EGFL7
GO:0048365	Rac GTPase binding	molecular_function	10	0.0894986	102173284	NOXA1
GO:0006355	regulation of transcription, DNA-templated	biological_process	8	0.0918481	102173656;102173827;108638020;	SAP25;LOC102173827;LOC108638020;
GO:0005801	cis-Golgi network	cellular_component	6	0.0925445	102172817	UBXN2A
GO:0010494	cytoplasmic stress granule	cellular_component	8	0.0925445	102183627	ZFP36
GO:0005737	cytoplasm	cellular_component	5	0.0934922	102170348;102173656;102174906;102174972;102183379;102183627;102184316;102185060;102186826;102188889;	RHOF;SAP25;SFTPD;CARD14;TXNIP;ZFP36;ZNF641;C27H8orf4;KCNIP2;HPN;
GO:0055038	recycling endosome membrane	cellular_component	9	0.0955803	102174396	SCAMP1
GO:0005615	extracellular space	cellular_component	4	0.0972984	100860805;102172910;102174906;102180880;102183734;	SPP1;EGFL7;SFTPD;LOC102180880;GCG;
GO:0007173	epidermal growth factor receptor signaling pathway	biological_process	9	0.0986061	102189677	SHC3
GO:0015459	potassium channel regulator activity	molecular_function	6	0.0986061	102186826	KCNIP2
GO:0030672	synaptic vesicle membrane	cellular_component	4	0.0986061	102174396	SCAMP1
GO:0002548	monocyte chemotaxis	biological_process	6	0.104628	102180880	LOC102180880
GO:0042267	natural killer cell mediated cytotoxicity	biological_process	5	0.104628	108635459	LOC108635459
GO:0000981	RNA polymerase II transcription factor activity, sequence-specific DNA binding	molecular_function	5	0.105309	102184316;102191672;	ZNF641;ZNF518A;
GO:0007265	Ras protein signal transduction	biological_process	7	0.107624	102189677	SHC3
GO:0071346	cellular response to interferon-gamma	biological_process	8	0.113586	102180880	LOC102180880
GO:0050729	positive regulation of inflammatory response	biological_process	9	0.116553	102180880	LOC102180880
GO:0001938	positive regulation of endothelial cell proliferation	biological_process	9	0.119509	102172910	EGFL7
GO:0006406	mRNA export from nucleus	biological_process	11	0.122456	108637994	SRRM5
GO:0030139	endocytic vesicle	cellular_component	7	0.125393	108637540	LOC108637540
GO:0030216	keratinocyte differentiation	biological_process	8	0.125393	102183379	TXNIP
GO:0030971	receptor tyrosine kinase binding	molecular_function	6	0.125393	102189677	SHC3
GO:0003676	nucleic acid binding	molecular_function	5	0.131784	102184316;108638020;	ZNF641;LOC108638020;
GO:0005576	extracellular region	cellular_component	3	0.134145	100860805;100861219;102172910;102174906;	SPP1;SEPP1;EGFL7;SFTPD;
GO:0001570	vasculogenesis	biological_process	6	0.134147	102172910	EGFL7
GO:0006606	protein import into nucleus	biological_process	11	0.134147	102183379	TXNIP
GO:0008009	chemokine activity	molecular_function	8	0.134147	102180880	LOC102180880
GO:0043085	positive regulation of catalytic activity	biological_process	6	0.134147	102173284	NOXA1
GO:0030307	positive regulation of cell growth	biological_process	7	0.139935	102188889	HPN
GO:0043086	negative regulation of catalytic activity	biological_process	6	0.139935	102183379	TXNIP
GO:0042632	cholesterol homeostasis	biological_process	9	0.145684	108637540	LOC108637540
GO:0071347	cellular response to interleukin-1	biological_process	8	0.145684	102180880	LOC102180880
GO:0030593	neutrophil chemotaxis	biological_process	7	0.151396	102180880	LOC102180880
GO:0002181	cytoplasmic translation	biological_process	9	0.154237	102183178	LOC102183178
GO:0007015	actin filament organization	biological_process	6	0.154237	102170348	RHOF
GO:0033209	tumor necrosis factor-mediated signaling pathway	biological_process	7	0.15707	102174972	CARD14
GO:0003823	antigen binding	molecular_function	4	0.162706	108635459	LOC108635459
GO:0005581	collagen trimer	cellular_component	4	0.162706	102174906	SFTPD
GO:0043130	ubiquitin binding	molecular_function	6	0.162706	102172817	UBXN2A
GO:0007417	central nervous system development	biological_process	6	0.16551	102189677	SHC3
GO:0006887	exocytosis	biological_process	7	0.168306	102174396	SCAMP1
GO:0050680	negative regulation of epithelial cell proliferation	biological_process	8	0.168306	102188889	HPN
GO:0019882	antigen processing and presentation	biological_process	4	0.171091	108635459	LOC108635459
GO:0070098	chemokine-mediated signaling pathway	biological_process	7	0.171091	102180880	LOC102180880
GO:0005856	cytoskeleton	cellular_component	6	0.175701	102170348	RHOF
GO:0007030	Golgi organization	biological_process	6	0.179394	102172817	UBXN2A
GO:0071356	cellular response to tumor necrosis factor	biological_process	8	0.179394	102180880	LOC102180880
GO:0006979	response to oxidative stress	biological_process	5	0.184883	102183379	TXNIP
GO:0008076	voltage-gated potassium channel complex	cellular_component	9	0.190336	102186826	KCNIP2
GO:0030336	negative regulation of cell migration	biological_process	8	0.198449	102172910	EGFL7
GO:0010008	endosome membrane	cellular_component	8	0.201135	108637540	LOC108637540
GO:0047485	protein N-terminus binding	molecular_function	5	0.201135	102186826	KCNIP2
GO:0006351	transcription, DNA-templated	biological_process	8	0.202483	102184316;102191672;108636723;	ZNF641;ZNF518A;LOC108636723;
GO:0017124	SH3 domain binding	molecular_function	6	0.203813	102173284	NOXA1
GO:0005179	hormone activity	molecular_function	7	0.206481	102183734	GCG
GO:0001934	positive regulation of protein phosphorylation	biological_process	10	0.209141	102174972	CARD14
GO:0008380	RNA splicing	biological_process	10	0.209141	108637994	SRRM5
GO:0000165	MAPK cascade	biological_process	11	0.224916	102189677	SHC3
GO:0007169	transmembrane receptor protein tyrosine kinase signaling pathway	biological_process	7	0.227515	102189677	SHC3
GO:0031175	neuron projection development	biological_process	7	0.23526	108637540	LOC108637540
GO:0044325	ion channel binding	molecular_function	5	0.240381	102186826	KCNIP2
GO:0031012	extracellular matrix	cellular_component	4	0.253035	102172910	EGFL7
GO:0071805	potassium ion transmembrane transport	biological_process	10	0.260528	102188889	HPN
GO:0001649	osteoblast differentiation	biological_process	6	0.263009	100860805	SPP1
GO:0042626	ATPase activity, coupled to transmembrane movement of substances	molecular_function	8	0.265482	102181811	LOC102181811
GO:0051092	positive regulation of NF-kappaB transcription factor activity	biological_process	7	0.265482	102174972	CARD14
GO:0006397	mRNA processing	biological_process	10	0.272852	108637994	SRRM5
GO:0046872	metal ion binding	molecular_function	6	0.274729	102184316;102185444;102191672;	ZNF641;MBNL3;ZNF518A;
GO:0006357	regulation of transcription from RNA polymerase II promoter	biological_process	9	0.279937	102184316;102191672;	ZNF641;ZNF518A;
GO:0006897	endocytosis	biological_process	7	0.280148	108637540	LOC108637540
GO:0031410	cytoplasmic vesicle	cellular_component	6	0.282565	102174906	SFTPD
GO:0005802	trans-Golgi network	cellular_component	7	0.289765	102174396	SCAMP1
GO:0000398	mRNA splicing, via spliceosome	biological_process	13	0.299256	108637994	SRRM5
GO:0005516	calmodulin binding	molecular_function	5	0.303954	102185139	PHKG1
GO:0030246	carbohydrate binding	molecular_function	4	0.308621	102174906	SFTPD
GO:0005911	cell-cell junction	cellular_component	4	0.313257	102188889	HPN
GO:0043161	proteasome-mediated ubiquitin-dependent protein catabolic process	biological_process	11	0.320154	102172817	UBXN2A
GO:0005789	endoplasmic reticulum membrane	cellular_component	5	0.321938	102188889	HPN
GO:0003735	structural constituent of ribosome	molecular_function	4	0.329302	102183178;108633289;	LOC102183178;SLC25A53;
GO:0043209	myelin sheath	cellular_component	4	0.338214	108637540	LOC108637540
GO:0008360	regulation of cell shape	biological_process	8	0.340438	102188889	HPN
GO:0001525	angiogenesis	biological_process	5	0.342654	102172910	EGFL7
GO:0010628	positive regulation of gene expression	biological_process	8	0.351447	102188889	HPN
GO:0051260	protein homooligomerization	biological_process	8	0.357966	108633896	KCTD7
GO:0070374	positive regulation of ERK1 and ERK2 cascade	biological_process	12	0.357966	102180880	LOC102180880
GO:0031965	nuclear membrane	cellular_component	5	0.377137	102188889	HPN
GO:0005509	calcium ion binding	molecular_function	7	0.380465	102172910;102186826;108637540;	EGFL7;KCNIP2;LOC108637540;
GO:0022625	cytosolic large ribosomal subunit	cellular_component	8	0.38132	102183178	LOC102183178
GO:0042802	identical protein binding	molecular_function	5	0.382553	102174906;102186826;	SFTPD;KCNIP2;
GO:0004871	signal transducer activity	molecular_function	NA	0.385475	102189677	SHC3
GO:0005769	early endosome	cellular_component	8	0.389603	108637540	LOC108637540
GO:0043547	positive regulation of GTPase activity	biological_process	8	0.399148	102180880;102189677;	LOC102180880;SHC3;
GO:0043025	neuronal cell body	cellular_component	5	0.411822	102188889	HPN
GO:0005829	cytosol	cellular_component	6	0.415962	102172817;102189677;108633896;	UBXN2A;SHC3;KCTD7;
GO:0005125	cytokine activity	molecular_function	7	0.431328	100860805	SPP1
GO:0005578	proteinaceous extracellular matrix	cellular_component	NA	0.431328	102174906	SFTPD
GO:0004252	serine-type endopeptidase activity	molecular_function	8	0.444602	102188889	HPN
GO:0006810	transport	biological_process	5	0.453895	108633289	SLC25A53
GO:0015031	protein transport	biological_process	9	0.466649	102174396	SCAMP1
GO:0055085	transmembrane transport	biological_process	6	0.491283	102181811	LOC102181811
GO:0006954	inflammatory response	biological_process	6	0.506523	102180880	LOC102180880
GO:0031625	ubiquitin protein ligase binding	molecular_function	7	0.522929	102183379	TXNIP
GO:0007264	small GTPase mediated signal transduction	biological_process	6	0.52454	102170348	RHOF
GO:0000122	negative regulation of transcription from RNA polymerase II promoter	biological_process	10	0.563675	102183379	TXNIP
GO:0045087	innate immune response	biological_process	5	0.568988	102174906	SFTPD
GO:0030054	cell junction	cellular_component	3	0.573346	102174396	SCAMP1
GO:0006412	translation	biological_process	8	0.601306	108633289	SLC25A53
GO:0005730	nucleolus	cellular_component	6	0.645993	102185060	C27H8orf4
GO:0006468	protein phosphorylation	biological_process	9	0.671458	102185139	PHKG1
GO:0005886	plasma membrane	cellular_component	4	0.687769	102170348;102183468;102188889;102189677;108633896;108635459;108637540;	RHOF;XKR8;HPN;SHC3;KCTD7;LOC108635459;LOC108637540;
GO:0009986	cell surface	cellular_component	4	0.687799	102188889	HPN
GO:0000166	nucleotide binding	molecular_function	5	0.697216	108637994	SRRM5
GO:0005622	intracellular	cellular_component	4	0.713673	102183734;108638020;	GCG;LOC108638020;
GO:0005654	nucleoplasm	cellular_component	6	0.717065	102174396;102184316;108637994;	SCAMP1;ZNF641;SRRM5;
GO:0048471	perinuclear region of cytoplasm	cellular_component	6	0.718115	108637540	LOC108637540
GO:0005515	protein binding	molecular_function	4	0.728826	102189677	SHC3
GO:0006508	proteolysis	biological_process	7	0.748117	102188889	HPN
GO:0005887	integral component of plasma membrane	cellular_component	6	0.787917	102188889	HPN
GO:0005739	mitochondrion	cellular_component	6	0.809347	108635404	LOC108635404
GO:0005783	endoplasmic reticulum	cellular_component	6	0.818004	102172817	UBXN2A
GO:0044822	poly(A) RNA binding	molecular_function	NA	0.822404	102185444;108637994;	MBNL3;SRRM5;
GO:0016021	integral component of membrane	cellular_component	5	0.853652	102174396;102180951;102181811;102183468;102184859;102186982;108633289;108638507;	SCAMP1;LAPTM4B;LOC102181811;XKR8;LOC102184859;TMEM52;SLC25A53;LOC108638507;
GO:0005634	nucleus	cellular_component	6	0.864259	102172817;102173656;102176475;102183627;102184316;102191672;108637994;	UBXN2A;SAP25;ARMC12;ZFP36;ZNF641;ZNF518A;SRRM5;
GO:0005524	ATP binding	molecular_function	5	0.945918	102181811;102185139;	LOC102181811;PHKG1;
GO:0070062	extracellular exosome	cellular_component	7	0.981658	102170348;102188889;	RHOF;HPN;
GO:0007186	G-protein coupled receptor signaling pathway	biological_process	5	0.991429	102180880	LOC102180880
