# Supplementary material for: The mRNA and miRNA profiles of goat bronchial epithelial cells stimulated by Pasteurella multocida strains of serotype A and D
Source: PeerJ. 2022 Mar 18;10:e13047. doi: 10.7717/peerj.13047 (PMC8935994; doi:10.7717/peerj.13047)
Supplement: Table S10 [file peerj-10-13047-s010.xlsx]

## Sheet: Sheet1
GO enrichment analysis of common differentially expressed genes in the P. multocida strain serotypes A- and D- stimulated groups
GO_ID	GO_Term	GO_function	GO_class	p-value(P. multocida strain serotype A stimulated group)	p-value(P. multocida strain serotype D stimulated group)	Gene_ID	Gene_name
GO:0000122	negative regulation of transcription from RNA polymerase II promoter	biological_process	10	0.0729055	0.563675	102171875	KLF4
GO:0000987	core promoter proximal region sequence-specific DNA binding	molecular_function	9	0.117504	0.0521525	102171875	KLF4
GO:0001010	transcription factor activity, sequence-specific DNA binding transcription factor recruiting	molecular_function	8	0.00777932	0.00334081	102171875	KLF4
GO:0001047	core promoter binding	molecular_function	8	0.318267	0.151396	102171875	KLF4
GO:0001077	transcriptional activator activity, RNA polymerase II core promoter proximal region sequence-specific binding	molecular_function	NA	0.00313393	0.459398	102171875	KLF4
GO:0001085	RNA polymerase II transcription factor binding	molecular_function	6	0.21516	0.0986061	102171875	KLF4
GO:0001190	transcriptional activator activity, RNA polymerase II transcription factor binding	molecular_function	NA	0.11058	0.048973	102171875	KLF4
GO:0001588	dopamine neurotransmitter receptor activity, coupled via Gs	molecular_function	8	0.0307582	0.0132974	102180503	GPR21
GO:0001656	metanephros development	biological_process	7	2.31462e-05	0.0710105	106503097	IRX3
GO:0001664	G-protein coupled receptor binding	molecular_function	6	0.00424769	0.131239	102170026	NPFF
GO:0001666	response to hypoxia	biological_process	5	0.103192	0.209141	102176667	DDIT4
GO:0001764	neuron migration	biological_process	7	0.51328	0.265482	102176667	DDIT4
GO:0001963	synaptic transmission, dopaminergic	biological_process	10	0.0751412	0.0329173	102180503	GPR21
GO:0003674	molecular_function	molecular_function	2	0.605292	0.00717116	102176796;102189598;	FAM166B;SAMD10;
GO:0003676	nucleic acid binding	molecular_function	5	0.172074	0.131784	102171875;102172004;	KLF4;ZBTB32;
GO:0003677	DNA binding	molecular_function	6	0.570295	0.930297	106503097	IRX3
GO:0003707	steroid hormone receptor activity	molecular_function	5	0.31291	0.148545	100860876	RORC
GO:0003924	GTPase activity	molecular_function	9	0.754372	0.452049	102176404	TUBA8
GO:0003964	RNA-directed DNA polymerase activity	molecular_function	8	0.0751412	0.0329173	106502407	LOC106502407
GO:0004803	transposase activity	molecular_function	5	0.0154985	0.00667062	102175781	LOC102175781
GO:0004806	triglyceride lipase activity	molecular_function	7	0.103602	0.045783	100860801	LIPE
GO:0004879	RNA polymerase II transcription factor activity, ligand-activated sequence-specific DNA binding	molecular_function	6	0.177458	0.0803003	100860876	RORC
GO:0005184	neuropeptide hormone activity	molecular_function	8	0.131191	0.0584801	102170026	NPFF
GO:0005200	structural constituent of cytoskeleton	molecular_function	4	0.0771887	0.179394	102176404	TUBA8
GO:0005432	calcium:sodium antiporter activity	molecular_function	10	0.0307582	0.0132974	102171644	SLC8A2
GO:0005507	copper ion binding	molecular_function	8	0.328858	0.15707	102185818	F8
GO:0005515	protein binding	molecular_function	4	0.0965556	0.728826	102176573;102183116;	MAPRE2;RSRP1;
GO:0005525	GTP binding	molecular_function	8	0.360448	0.0415085	102176404	TUBA8
GO:0005540	hyaluronic acid binding	molecular_function	6	0.164495	0.0741174	102184100	TNFAIP6
GO:0005575	cellular_component	cellular_component	2	0.570218	0.00139868	102175781;102176796;102189598;	LOC102175781;FAM166B;SAMD10;
GO:0005615	extracellular space	cellular_component	4	0.0675892	0.0972984	102170026	NPFF
GO:0005634	nucleus	cellular_component	6	0.372697	0.864259	106503097	IRX3
GO:0005654	nucleoplasm	cellular_component	6	0.568647	0.717065	102171875	KLF4
GO:0005719	nuclear euchromatin	cellular_component	8	0.157937	0.0710105	102171875	KLF4
GO:0005730	nucleolus	cellular_component	6	0.577085	0.645993	100860876	RORC
GO:0005737	cytoplasm	cellular_component	5	0.000161188	0.0934922	102171875;102176404;102176573;102176667;102190234;106503097;	KLF4;TUBA8;MAPRE2;DDIT4;WDR72;IRX3;
GO:0005739	mitochondrion	cellular_component	6	0.402637	0.809347	102176667	DDIT4
GO:0005768	endosome	cellular_component	7	0.688948	0.393704	102190234	WDR72
GO:0005789	endoplasmic reticulum membrane	cellular_component	5	0.506393	0.321938	102186423	JPH3
GO:0005811	lipid particle	cellular_component	6	0.31291	0.0112394	100860801	LIPE
GO:0005829	cytosol	cellular_component	6	0.773729	0.415962	100860801;102176667;	LIPE;DDIT4;
GO:0005856	cytoskeleton	cellular_component	6	0.259665	0.175701	102176573	MAPRE2
GO:0005874	microtubule	cellular_component	7	0.040162	0.105309	102176404;102176573;	TUBA8;MAPRE2;
GO:0005886	plasma membrane	cellular_component	4	0.193797	0.687769	102186423	JPH3
GO:0005887	integral component of plasma membrane	cellular_component	6	0.505829	0.787917	102171644	SLC8A2
GO:0006310	DNA recombination	biological_process	8	0.279876	0.131239	106502407	LOC106502407
GO:0006313	transposition, DNA-mediated	biological_process	9	0.0154985	0.00667062	102175781	LOC102175781
GO:0006351	transcription, DNA-templated	biological_process	8	0.297385	0.202483	100860876	RORC
GO:0006355	regulation of transcription, DNA-templated	biological_process	8	0.857552	0.0918481	100860876;106503097;108634775;	RORC;IRX3;LOC108634775;
GO:0006366	transcription from RNA polymerase II promoter	biological_process	9	0.00542369	0.684596	102171875	KLF4
GO:0006874	cellular calcium ion homeostasis	biological_process	11	0.0179599	0.211792	102171644	SLC8A2
GO:0007017	microtubule-based process	biological_process	4	0.21516	0.0986061	102176404	TUBA8
GO:0007049	cell cycle	biological_process	4	0.0350985	0.265482	102176573	MAPRE2
GO:0007067	mitotic nuclear division	biological_process	NA	0.231012	0.324714	102176573	MAPRE2
GO:0007154	cell communication	biological_process	4	0.0185859	0.0864426	102171644	SLC8A2
GO:0007155	cell adhesion	biological_process	4	0.210315	0.0305337	102184100	TNFAIP6
GO:0007191	adenylate cyclase-activating dopamine receptor signaling pathway	biological_process	9	0.0751412	0.0329173	102180503	GPR21
GO:0007218	neuropeptide signaling pathway	biological_process	6	0.46943	0.237824	102170026	NPFF
GO:0007283	spermatogenesis	biological_process	7	0.480129	0.501494	102182798	TSGA10
GO:0007420	brain development	biological_process	6	0.528316	0.275292	102176667	DDIT4
GO:0007498	mesoderm development	biological_process	6	0.0894819	0.0393714	106503097	IRX3
GO:0007612	learning	biological_process	5	0.000211996	0.000277007	102171644;102180503;102186423;	SLC8A2;GPR21;JPH3;
GO:0007613	memory	biological_process	5	0.000285621	0.00829404	102171644;102186423;	SLC8A2;JPH3;
GO:0008013	beta-catenin binding	molecular_function	5	0.0166495	0.206481	102171875	KLF4
GO:0008017	microtubule binding	molecular_function	7	0.000548999	0.122652	102176573;108638515;	MAPRE2;LOC108638515;
GO:0008142	oxysterol binding	molecular_function	7	0.023158	0.00998946	100860876	RORC
GO:0008150	biological_process	biological_process	2	0.748358	0.0213578	102176796;102189598;	FAM166B;SAMD10;
GO:0008203	cholesterol metabolic process	biological_process	8	0.0302597	0.11061	100860801	LIPE
GO:0008270	zinc ion binding	molecular_function	8	0.932715	0.976882	100860876	RORC
GO:0008283	cell proliferation	biological_process	3	0.146823	0.435152	102176667	DDIT4
GO:0008285	negative regulation of cell proliferation	biological_process	7	0.00992109	0.543455	102171875	KLF4
GO:0009036	Type II site-specific deoxyribonuclease activity	molecular_function	10	0.0307582	0.0132974	106502407	LOC106502407
GO:0009913	epidermal cell differentiation	biological_process	7	0.0382997	0.0165944	102171875	KLF4
GO:0010801	negative regulation of peptidyl-threonine phosphorylation	biological_process	11	0.060576	0.0264204	102176667	DDIT4
GO:0015278	calcium-release channel activity	molecular_function	9	0.0307582	0.0132974	102186423	JPH3
GO:0016021	integral component of membrane	cellular_component	5	0.984459	0.853652	102180503;102181714;102186423;106503930;108634775;	GPR21;C18H19orf18;JPH3;LOC106503930;LOC108634775;
GO:0016491	oxidoreductase activity	molecular_function	4	0.580702	0.310943	102185818	F8
GO:0019433	triglyceride catabolic process	biological_process	10	0.060576	0.0264204	100860801	LIPE
GO:0019827	stem cell population maintenance	biological_process	4	0.285489	0.134147	102171875	KLF4
GO:0019901	protein kinase binding	molecular_function	7	0.207624	0.637438	100860801	LIPE
GO:0030168	platelet activation	biological_process	5	0.190221	0.0864426	102185818	F8
GO:0030182	neuron differentiation	biological_process	6	0.00147144	0.190336	102176667	DDIT4
GO:0030314	junctional membrane complex	cellular_component	4	0.060576	0.0264204	102186423	JPH3
GO:0030424	axon	cellular_component	6	0.676473	0.383401	106503097	IRX3
GO:0030425	dendrite	cellular_component	6	0.136051	0.423604	102170026	NPFF
GO:0030522	intracellular receptor signaling pathway	biological_process	5	0.208998	0.0955803	100860876	RORC
GO:0031077	post-embryonic camera-type eye development	biological_process	9	0.023158	0.00998946	102171875	KLF4
GO:0032007	negative regulation of TOR signaling	biological_process	10	0.171001	0.0772139	102176667	DDIT4
GO:0032088	negative regulation of NF-kappaB transcription factor activity	biological_process	7	0.0749425	0.176636	102171875	KLF4
GO:0032197	transposition, RNA-mediated	biological_process	5	0.0532081	0.0231559	106502407	LOC106502407
GO:0032199	reverse transcription involved in RNA-mediated transposition	biological_process	11	0.0307582	0.0132974	106502407	LOC106502407
GO:0032270	positive regulation of cellular protein metabolic process	biological_process	8	0.0532081	0.0231559	102171875	KLF4
GO:0032526	response to retinoic acid	biological_process	6	0.183864	0.0833765	102171875	KLF4
GO:0033137	negative regulation of peptidyl-serine phosphorylation	biological_process	11	0.144668	0.064766	102176667	DDIT4
GO:0034115	negative regulation of heterotypic cell-cell adhesion	biological_process	8	0.0382997	0.0165944	102171875	KLF4
GO:0035166	post-embryonic hemopoiesis	biological_process	8	0.0307582	0.0132974	102171875	KLF4
GO:0035240	dopamine binding	molecular_function	5	0.0457828	0.0198805	102180503	GPR21
GO:0035371	microtubule plus-end	cellular_component	7	0.0965692	0.0425825	102176573	MAPRE2
GO:0035640	exploration behavior	biological_process	4	0.0823394	0.0361497	102186423	JPH3
GO:0035725	sodium ion transmembrane transport	biological_process	10	0.403244	0.198449	102171644	SLC8A2
GO:0035778	pronephric nephron tubule epithelial cell differentiation	biological_process	8	0.00777932	0.00334081	106503097	IRX3
GO:0036315	cellular response to sterol	biological_process	8	0.0154985	0.00667062	100860876	RORC
GO:0039023	pronephric duct morphogenesis	biological_process	9	0.0154985	0.00667062	106503097	IRX3
GO:0040011	locomotion	biological_process	3	0.0678868	0.0296742	102186423	JPH3
GO:0040018	positive regulation of multicellular organism growth	biological_process	8	0.196529	0.0894986	102180503	GPR21
GO:0042593	glucose homeostasis	biological_process	8	0.149798	0.255541	102180503	GPR21
GO:0042758	long-chain fatty acid catabolic process	biological_process	11	0.023158	0.00998946	100860801	LIPE
GO:0042771	intrinsic apoptotic signaling pathway in response to DNA damage by p53 class mediator	biological_process	8	0.21516	0.0986061	102176667	DDIT4
GO:0043154	negative regulation of cysteine-type endopeptidase activity involved in apoptotic process	biological_process	10	0.0517664	0.145684	102171875	KLF4
GO:0043204	perikaryon	cellular_component	5	0.279876	0.131239	102170026	NPFF
GO:0043241	protein complex disassembly	biological_process	NA	0.0307582	0.0132974	102176667	DDIT4
GO:0043401	steroid hormone mediated signaling pathway	biological_process	6	0.328858	0.15707	100860876	RORC
GO:0043565	sequence-specific DNA binding	molecular_function	7	0.0703496	0.352476	100860876;106503097;	RORC;IRX3;
GO:0043679	axon terminus	cellular_component	6	0.157937	0.0710105	102170026	NPFF
GO:0044798	nuclear transcription factor complex	cellular_component	5	0.060576	0.0264204	102171875	KLF4
GO:0045415	negative regulation of interleukin-8 biosynthetic process	biological_process	9	0.0154985	0.00667062	102171875	KLF4
GO:0045429	positive regulation of nitric oxide biosynthetic process	biological_process	9	0.131191	0.0584801	102171875	KLF4
GO:0045444	fat cell differentiation	biological_process	6	0.364653	0.176636	102171875	KLF4
GO:0045665	negative regulation of neuron differentiation	biological_process	10	0.0557565	0.151396	106503097	IRX3
GO:0045666	positive regulation of neuron differentiation	biological_process	10	0.0683355	0.168306	106503097	IRX3
GO:0045820	negative regulation of glycolytic process	biological_process	11	0.060576	0.0264204	102176667	DDIT4
GO:0045944	positive regulation of transcription from RNA polymerase II promoter	biological_process	10	0.0174219	0.927581	102171875	KLF4
GO:0046340	diacylglycerol catabolic process	biological_process	10	0.023158	0.00998946	100860801	LIPE
GO:0046627	negative regulation of insulin receptor signaling pathway	biological_process	9	0.171001	0.0772139	102180503	GPR21
GO:0046825	regulation of protein export from nucleus	biological_process	9	0.0382997	0.0165944	106503930	LOC106503930
GO:0046872	metal ion binding	molecular_function	6	0.325331	0.274729	102171875;102172004;106502407;	KLF4;ZBTB32;LOC106502407;
GO:0046985	positive regulation of hemoglobin biosynthetic process	biological_process	9	0.0154985	0.00667062	102171875	KLF4
GO:0048011	neurotrophin TRK receptor signaling pathway	biological_process	8	0.0823394	0.0361497	102176667	DDIT4
GO:0048168	regulation of neuronal synaptic plasticity	biological_process	10	0.0532081	0.0231559	102186423	JPH3
GO:0048172	regulation of short-term neuronal synaptic plasticity	biological_process	11	0.11058	0.048973	102171644	SLC8A2
GO:0048679	regulation of axon regeneration	biological_process	7	0.0382997	0.0165944	102171875	KLF4
GO:0048730	epidermis morphogenesis	biological_process	7	0.0307582	0.0132974	102171875	KLF4
GO:0050728	negative regulation of inflammatory response	biological_process	9	0.31291	0.148545	102184100	TNFAIP6
GO:0050885	neuromuscular process controlling balance	biological_process	7	0.0422752	0.131239	102186423	JPH3
GO:0051209	release of sequestered calcium ion into cytosol	biological_process	8	0.157937	0.0710105	102186423	JPH3
GO:0051301	cell division	biological_process	4	0.345676	0.409836	102176573	MAPRE2
GO:0051607	defense response to virus	biological_process	5	0.671344	0.379232	102176667	DDIT4
GO:0051973	positive regulation of telomerase activity	biological_process	8	0.157937	0.0710105	102171875	KLF4
GO:0055114	oxidation-reduction process	biological_process	4	0.234073	0.887184	102185818	F8
GO:0060070	canonical Wnt signaling pathway	biological_process	8	0.00279385	0.222308	102171875	KLF4
GO:0060079	excitatory postsynaptic potential	biological_process	7	0.151328	0.0678934	102170026	NPFF
GO:0060158	phospholipase C-activating dopamine receptor signaling pathway	biological_process	7	0.060576	0.0264204	102180503	GPR21
GO:0060291	long-term synaptic potentiation	biological_process	10	0.202788	0.0925445	102171644	SLC8A2
GO:0060314	regulation of ryanodine-sensitive calcium-release channel activity	biological_process	10	0.0382997	0.0165944	102186423	JPH3
GO:0060761	negative regulation of response to cytokine stimulus	biological_process	7	0.023158	0.00998946	102171875	KLF4
GO:0070062	extracellular exosome	cellular_component	7	0.881715	0.981658	102181714	C18H19orf18
GO:0070166	enamel mineralization	biological_process	8	0.0823394	0.0361497	102190234	WDR72
GO:0070588	calcium ion transmembrane transport	biological_process	11	0.0510526	0.301609	102171644	SLC8A2
GO:0071363	cellular response to growth factor stimulus	biological_process	7	0.171001	0.0772139	102171875	KLF4
GO:0071499	cellular response to laminar fluid shear stress	biological_process	7	0.0382997	0.0165944	102171875	KLF4
GO:0071889	14-3-3 protein binding	molecular_function	5	0.0678868	0.000390119	102176667	DDIT4
GO:0072086	specification of loop of Henle identity	biological_process	7	0.0307582	0.0132974	106503097	IRX3
GO:0072593	reactive oxygen species metabolic process	biological_process	5	0.164495	0.0741174	102176667	DDIT4
GO:0090051	negative regulation of cell migration involved in sprouting angiogenesis	biological_process	12	0.0532081	0.0231559	102171875	KLF4
GO:0090305	nucleic acid phosphodiester bond hydrolysis	biological_process	8	0.456804	0.230105	106502407	LOC106502407
GO:1901216	positive regulation of neuron death	biological_process	8	0.060576	0.0264204	102176667	DDIT4
GO:1902532	negative regulation of intracellular signal transduction	biological_process	9	0.00777932	0.00334081	102176667	DDIT4
GO:2000342	negative regulation of chemokine (C-X-C motif) ligand 2 production	biological_process	9	0.00777932	0.00334081	102171875	KLF4
GO:2000679	positive regulation of transcription regulatory region DNA binding	biological_process	8	0.0823394	0.0361497	102171875	KLF4
