# Supplementary material for: The mRNA and miRNA profiles of goat bronchial epithelial cells stimulated by Pasteurella multocida strains of serotype A and D
Source: PeerJ. 2022 Mar 18;10:e13047. doi: 10.7717/peerj.13047 (PMC8935994; doi:10.7717/peerj.13047)
Supplement: Table S11 [file peerj-10-13047-s011.xlsx]

## Sheet: Sheet1
KEGG enrichment analysis of specific differentially expressed genes in the P. multocida strain serotype A-stimulated group
pathway_id	pathway_name	p-value	Gene_ID	Gene_name
ko05200	Pathways in cancer	0.000579811	100860905;102168382;102169841;102171226;102176310;102178142;102179524;102184896;102185858;102188440;102190818;108633371;	PTGS2;LOC102168382;GNB3;FGF5;WNT5B;GLI3;EGLN3;WNT9A;ADCY7;FZD2;TMEM102;LOC108633371;
ko04916	Melanogenesis	0.00154408	102176310;102182155;102184896;102185858;102188440;102189791;	WNT5B;YPEL4;WNT9A;ADCY7;FZD2;YPEL2;
ko04320	Dorso-ventral axis formation	0.00210836	102169571;102171737;102173434;102182155;102189791;	CPEB2;ETV2;RHBDL1;YPEL4;YPEL2;
ko05217	Basal cell carcinoma	0.00255282	102176310;102178142;102184896;102188440;	WNT5B;GLI3;WNT9A;FZD2;
ko04150	mTOR signaling pathway	0.00511802	102178709;102182155;102189791;102189927;	BRSK2;YPEL4;YPEL2;DOC2A;
ko04261	Adrenergic signaling in cardiomyocytes	0.00626293	102178326;102182155;102182803;102185858;102189791;102191231;106503653;	JAKMIP3;YPEL4;CACNB2;ADCY7;YPEL2;KANK2;LOC106503653;
ko04540	Gap junction	0.00731416	102182155;102185801;102185858;102189791;	YPEL4;GJB3;ADCY7;YPEL2;
ko04340	Hedgehog signaling pathway	0.00985212	102176310;102177522;102178142;102184896;	WNT5B;VLDLR;GLI3;WNT9A;
ko00562	Inositol phosphate metabolism	0.0161816	102172019;102173853;102178972;102191053;	LOC102172019;ITPKA;PLCE1;GPATCH2L;
ko04727	GABAergic synapse	0.0171164	102169841;102183272;102185858;102190298;	GNB3;PLCL2;ADCY7;SLC38A4;
ko04114	Oocyte meiosis	0.0173067	102169571;102182155;102185858;102189791;102191231;	CPEB2;YPEL4;ADCY7;YPEL2;KANK2;
ko04070	Phosphatidylinositol signaling system	0.0176811	102172019;102173853;102178972;102189927;102191053;	LOC102172019;ITPKA;PLCE1;DOC2A;GPATCH2L;
ko04923	Regulation of lipolysis in adipocyte	0.0180539	100860905;102185858;	PTGS2;ADCY7;
ko04723	Retrograde endocannabinoid signaling	0.0180845	100860905;102169841;102170924;102185858;	PTGS2;GNB3;KCNJ9;ADCY7;
ko04933	AGE-RAGE signaling pathway in diabetic complications	0.0184459	102178972;102182155;102189791;102189927;108635080;	PLCE1;YPEL4;YPEL2;DOC2A;LOC108635080;
ko04014	Ras signaling pathway	0.0190248	102168443;102169841;102171226;102178126;102178972;102190818;108633371;	RGL3;GNB3;FGF5;EFNA4;PLCE1;TMEM102;LOC108633371;
ko04713	Circadian entrainment	0.0211906	102169841;102170924;102185724;102185858;	GNB3;KCNJ9;CACNA1I;ADCY7;
ko04724	Glutamatergic synapse	0.0211906	102169841;102185858;102187803;102190298;	GNB3;ADCY7;DLG4;SLC38A4;
ko04310	Wnt signaling pathway	0.0214348	102176310;102177651;102178101;102184896;102188440;102189927;	WNT5B;FHOD1;LOC102178101;WNT9A;FZD2;DOC2A;
ko04144	Endocytosis	0.0220302	100861132;102174633;102174774;102176547;102178326;102179344;102180584;102183843;102184280;102188250;108635183;	RAB30;KIF5A;THAP8;GLTP;JAKMIP3;VPS37D;LOC102180584;SRL;WNK4;ADAP2;LOC108635183;
ko04914	Progesterone-mediated oocyte maturation	0.0240146	102169571;102182155;102185858;102189791;	CPEB2;YPEL4;ADCY7;YPEL2;
ko04913	Ovarian Steroidogenesis	0.0242703	100860905;102184252;102185858;	PTGS2;LOC102184252;ADCY7;
ko04020	Calcium signaling pathway	0.0307352	102173853;102178972;102184780;102185724;102185858;	ITPKA;PLCE1;GPR85;CACNA1I;ADCY7;
ko04360	Axon guidance	0.0307352	102169974;102171324;102171839;102176310;102177680;102178126;	EFNB2;SEMA6B;LRRC4;WNT5B;LIMK1;EFNA4;
ko04151	PI3K-Akt signaling pathway	0.0365098	102169841;102171226;102173909;102178126;102190818;106503653;108633371;	GNB3;FGF5;LOC102173909;EFNA4;TMEM102;LOC106503653;LOC108633371;
ko04015	Rap1 signaling pathway	0.0380422	102171226;102178126;102178972;102185858;102190818;108633371;	FGF5;EFNA4;PLCE1;ADCY7;TMEM102;LOC108633371;
ko04910	Insulin signaling pathway	0.0391489	102172686;102182155;102189791;102191231;	PPP1R3C;YPEL4;YPEL2;KANK2;
ko05218	Melanoma	0.0397357	102171226;102190818;108633371;	FGF5;TMEM102;LOC108633371;
ko04270	Vascular smooth muscle contraction	0.0397795	102178091;102182155;102185858;102189791;102191231;	ADM;YPEL4;ADCY7;YPEL2;KANK2;
ko04390	Hippo signaling pathway	0.0404162	102176310;102184896;102187803;102188440;106503653;	WNT5B;WNT9A;DLG4;FZD2;LOC106503653;
ko04370	VEGF signaling pathway	0.0453824	100860905;102182155;102189791;	PTGS2;YPEL4;YPEL2;
ko00510	N-Glycan biosynthesis	0.0465572	102184670;102185032;102187705;	KCTD6;KCTD11;KCTD15;
ko04620	Toll-like receptor signaling pathway	0.0473448	102182155;102184116;102189791;106503773;	YPEL4;LOC102184116;YPEL2;IRF7;
ko04728	Dopaminergic synapse	0.0482226	102169841;102170924;102174633;106503653;	GNB3;KCNJ9;KIF5A;LOC106503653;
ko04925	Aldosterone synthesis and secretion	0.0618017	102185724;102185858;	CACNA1I;ADCY7;
ko05032	Morphine addiction	0.064543	102169841;102170924;102185858;	GNB3;KCNJ9;ADCY7;
ko04350	TGF-beta signaling pathway	0.0809912	102174774;102180913;102182155;102189791;	THAP8;PITX3;YPEL4;YPEL2;
ko04068	FoxO signaling pathway	0.0870342	102178036;102178709;102182155;102185425;102189791;	BNIP3;BRSK2;YPEL4;FOXO6;YPEL2;
ko04810	Regulation of actin cytoskeleton	0.0928306	102171226;102177680;102182155;102185379;102189645;102189791;102190818;102191231;108633371;	FGF5;LIMK1;YPEL4;PLAG1;VAV3;YPEL2;TMEM102;KANK2;LOC108633371;
ko04921	Oxytocin signaling pathway	0.0955317	100860905;102170924;102182803;102185858;	PTGS2;KCNJ9;CACNB2;ADCY7;
ko05414	Dilated cardiomyopathy (DCM)	0.0981844	102178403;102182803;102185858;	DAG1;CACNB2;ADCY7;
ko04024	cAMP signaling pathway	0.103701	102178142;102178972;102185858;102189645;	GLI3;PLCE1;ADCY7;VAV3;
ko04912	GnRH signaling pathway	0.11363	102182155;102185858;102189791;	YPEL4;ADCY7;YPEL2;
ko00983	Drug metabolism - other enzymes	0.119688	102173632;102191092;	LOC102173632;CDA;
ko04010	MAPK signaling pathway	0.121551	102171226;102181070;102182155;102182803;102185379;102185724;102189791;102190818;108633371;
ko04152	AMPK signaling pathway	0.131794	102189974;106503653;	RAB39A;LOC106503653;
ko04974	Protein digestion and absorption	0.141191	102190298;108635080;	SLC38A4;LOC108635080;
ko05211	Renal cell carcinoma	0.141966	102168382;102179524;	LOC102168382;EGLN3;
ko05168	Herpes simplex infection	0.156846	102171331;102180584;102184427;102191231;106503773;	SRSF6;LOC102180584;LOC102184427;KANK2;IRF7;
ko05166	HTLV-I infection	0.170266	102176310;102180584;102184896;102185858;102188440;	WNT5B;LOC102180584;WNT9A;ADCY7;FZD2;
ko04213	Longevity regulating pathway - multiple species	0.170907	102185858;106501749;	ADCY7;FOXC2;
ko04611	Platelet activation	0.172867	102173909;102185858;108635080;	LOC102173909;ADCY7;LOC108635080;
ko04726	Serotonergic synapse	0.176956	100860905;102169841;102170924;	PTGS2;GNB3;KCNJ9;
ko04950	Maturity onset diabetes of the young	0.179775	102182306;106501749;	RFX3;FOXC2;
ko04520	Adherens junction	0.181072	102182155;102182806;102189791;	YPEL4;PTK6;YPEL2;
ko03015	mRNA surveillance pathway	0.187294	102186419;102191231;106503653;	TARDBP;KANK2;LOC106503653;
ko04530	Tight junction	0.192631	102178326;102182806;102188225;106503653;	JAKMIP3;PTK6;SPTB;LOC106503653;
ko00533	Glycosaminoglycan biosynthesis - keratan sulfate	0.207795	102176255	B3GNT9
ko04060	Cytokine-cytokine receptor interaction	0.210059	102171182;102181435;102188305;102191637;	CENPBD1;THPO;CD70;TNFRSF18;
ko04550	Signaling pathways regulating pluripotency of stem cells	0.217829	102176310;102184896;102188440;	WNT5B;WNT9A;FZD2;
ko05416	Viral myocarditis	0.221934	102178403;102180584;	DAG1;LOC102180584;
ko05204	Chemical carcinogenesis	0.228031	100860905;102184252;	PTGS2;LOC102184252;
ko05412	Arrhythmogenic right ventricular cardiomyopathy (ARVC)	0.234139	102178403;102182803;	DAG1;CACNB2;
ko04210	Apoptosis	0.241027	102171134;102182992;	CTSW;DFFB;
ko00534	Glycosaminoglycan biosynthesis - heparan sulfate / heparin	0.24641	102176690	HS3ST5
ko05205	Proteoglycans in cancer	0.251574	102176310;102178972;102184896;102188440;	WNT5B;PLCE1;WNT9A;FZD2;
ko04915	Estrogen signaling pathway	0.264794	102170924;102185858;	KCNJ9;ADCY7;
ko04062	Chemokine signaling pathway	0.267695	102169841;102185858;102189645;	GNB3;ADCY7;VAV3;
ko00310	Lysine degradation	0.267864	100861074;106503653;	ANKRD37;LOC106503653;
ko04725	Cholinergic synapse	0.274004	102169841;102185858;	GNB3;ADCY7;
ko04621	NOD-like receptor signaling pathway	0.289342	102182155;102189791;	YPEL4;YPEL2;
ko05410	Hypertrophic cardiomyopathy (HCM)	0.289342	102178403;102182803;	DAG1;CACNB2;
ko04931	Insulin resistance	0.308271	102172686;102178709;102191231;	PPP1R3C;BRSK2;KANK2;
ko04666	Fc gamma R-mediated phagocytosis	0.319889	102177680;102189645;	LIMK1;VAV3;
ko04145	Phagosome	0.321788	102178326;102180584;102184116;	JAKMIP3;LOC102180584;LOC102184116;
ko04260	Cardiac muscle contraction	0.322929	102178326;102182803;	JAKMIP3;CACNB2;
ko05142	Chagas disease (American trypanosomiasis)	0.325966	102184116;106503653;	LOC102184116;LOC106503653;
ko04120	Ubiquitin mediated proteolysis	0.344359	102168382;102174774;102179902;102189403;	LOC102168382;THAP8;TRIM45;SALL2;
ko04071	Sphingolipid signaling pathway	0.353124	102179052;106503653;	DEGS2;LOC106503653;
ko04962	Vasopressin-regulated water reabsorption	0.362133	102188601	PLEKHH2
ko05132	Salmonella infection	0.365078	102182155;102189791;	YPEL4;YPEL2;
ko04066	HIF-1 signaling pathway	0.388729	102168382;102179524;	LOC102168382;EGLN3;
ko05160	Hepatitis C	0.388729	106503653;106503773;	LOC106503653;IRF7;
ko05030	Cocaine addiction	0.40828	102187803	DLG4
ko05330	Allograft rejection	0.40828	102180584	LOC102180584
ko04970	Salivary secretion	0.411991	102179639;102185858;	BEST1;ADCY7;
ko00380	Tryptophan metabolism	0.418076	102184252	LOC102184252
ko04140	Regulation of autophagy	0.418076	102178709	BRSK2
ko05332	Graft-versus-host disease	0.441869	102180584	LOC102180584
ko04610	Complement and coagulation cascades	0.454398	102173909	LOC102173909
ko04960	Aldosterone-regulated sodium reabsorption	0.460206	102170104	SLC9A3R2
ko04510	Focal adhesion	0.463879	102173909;102182155;102185379;102189645;102189791;102191231;	LOC102173909;YPEL4;PLAG1;VAV3;YPEL2;KANK2;
ko00970	Aminoacyl-tRNA biosynthesis	0.469149	102181150	FBXO17
ko05206	MicroRNAs in cancer	0.472929	100860905;102184252;	PTGS2;LOC102184252;
ko05320	Autoimmune thyroid disease	0.473566	102180584	LOC102180584
ko04514	Cell adhesion molecules (CAMs)	0.4793	102168594;102171839;102180584;	AMIGO1;LRRC4;LOC102180584;
ko04940	Type I diabetes mellitus	0.495107	102180584	LOC102180584
ko00600	Sphingolipid metabolism	0.503476	102179052	DEGS2
ko00520	Amino sugar and nucleotide sugar metabolism	0.507609	102186611	LOC102186611
ko04080	Neuroactive ligand-receptor interaction	0.515652	102184780;102188120;	GPR85;APLN;
ko04664	Fc epsilon RI signaling pathway	0.515773	102189645	VAV3
ko00980	Metabolism of xenobiotics by cytochrome P450	0.527768	102184252	LOC102184252
ko03460	Fanconi anemia pathway	0.527768	106503241	HES7
ko04623	Cytosolic DNA-sensing pathway	0.527768	106503773	IRF7
ko05140	Leishmaniasis	0.527768	100860905	PTGS2
ko04918	Thyroid hormone synthesis	0.547107	102185858	ADCY7
ko04022	cGMP - PKG signaling pathway	0.555949	102185858	ADCY7
ko04650	Natural killer cell mediated cytotoxicity	0.555949	102180584;102189645;	LOC102180584;VAV3;
ko04662	B cell receptor signaling pathway	0.558332	102189645	VAV3
ko04512	ECM-receptor interaction	0.572722	102173909;102178403;	LOC102173909;DAG1;
ko04971	Gastric acid secretion	0.58346	102185858	ADCY7
ko00010	Glycolysis / Gluconeogenesis	0.597178	102181330	GAPDHS
ko04211	Longevity regulating pathway - mammal	0.600536	102185858	ADCY7
ko04612	Antigen processing and presentation	0.60717	102180584	LOC102180584
ko05202	Transcriptional misregulation in cancers	0.610915	102177693;106502052;	HOXC11;ZNF775;
ko04012	ErbB signaling pathway	0.619817	102182155;102185379;102189791;	YPEL4;PLAG1;YPEL2;
ko05134	Legionellosis	0.629541	102178036	BNIP3
ko04630	Jak-STAT signaling pathway	0.633102	102181435	THPO
ko05222	Small cell lung cancer	0.644742	100860905	PTGS2
ko00230	Purine metabolism	0.64559	102173632;102185858;	LOC102173632;ADCY7;
ko00140	Steroid hormone biosynthesis	0.647707	102184252	LOC102184252
ko04330	Notch signaling pathway	0.647707	106503241	HES7
ko04911	Insulin secretion	0.647707	102185858	ADCY7
ko04064	NF-kappa B signaling pathway	0.650647	100860905	PTGS2
ko04660	T cell receptor signaling pathway	0.662168	102189645	VAV3
ko04622	RIG-I-like receptor signaling pathway	0.673312	106503773	IRF7
ko05152	Tuberculosis	0.677262	102178326;102184116;	JAKMIP3;LOC102184116;
ko05164	Influenza A	0.688537	102175078;106503773;	PRSS33;IRF7;
ko04750	Inflammatory mediator regulation of TRP channels	0.694517	102185858	ADCY7
ko04668	TNF signaling pathway	0.697069	100860905	PTGS2
ko04922	Glucagon signaling pathway	0.697069	102178709	BRSK2
ko04722	Neurotrophin signaling pathway	0.704847	102181070	NTF4
ko00590	Arachidonic acid metabolism	0.70707	100860905	PTGS2
ko04146	Peroxisome	0.70707	102180469	TRIOBP
ko04640	Hematopoietic cell lineage	0.709519	102181435	THPO
ko03040	Spliceosome	0.710125	102171331;102184427;	SRSF6;LOC102184427;
ko04972	Pancreatic secretion	0.719112	102185858	ADCY7
ko04919	Thyroid hormone signaling pathway	0.721461	102178972	PLCE1
ko04670	Leukocyte transendothelial migration	0.72379	102189645	VAV3
ko05146	Amoebiasis	0.728391	108635080	LOC108635080
ko00240	Pyrimidine metabolism	0.730663	102191092	CDA
ko04742	Taste transduction	0.746046	102169841	GNB3
ko05203	Viral carcinogenesis	0.758707	102180584;106503773;	LOC102180584;IRF7;
ko04141	Protein processing in endoplasmic reticulum	0.768988	102173156;102177676;	MXI1;TXNDC2;
ko05162	Measles	0.772339	106503773	IRF7
ko04976	Bile secretion	0.774246	102185858	ADCY7
ko04072	Phospholipase D signaling pathway	0.776137	102185858	ADCY7
ko05161	Hepatitis B	0.80102	106503773	IRF7
ko05034	Alcoholism	0.871674	102169841	GNB3
ko04142	Lysosome	0.872753	102171134	CTSW
ko05016	Huntington's disease	0.892553	102187803	DLG4
ko05169	Epstein-Barr virus infection	0.908521	102180584	LOC102180584
ko04110	Cell cycle	0.913056	106502052	ZNF775
ko04740	Olfactory transduction	0.99944	108637087	LOC108637087
