# Supplementary material for: The mRNA and miRNA profiles of goat bronchial epithelial cells stimulated by Pasteurella multocida strains of serotype A and D
Source: PeerJ. 2022 Mar 18;10:e13047. doi: 10.7717/peerj.13047 (PMC8935994; doi:10.7717/peerj.13047)
Supplement: Table S12 [file peerj-10-13047-s012.xlsx]

## Sheet: Sheet1
KEGG enrichment analysis of specific differentially expressed genes in the P. multocida strain serotype D- stimulated group
pathway_id	pathway_name	p-value	Gene_ID	Gene_name
ko04910	Insulin signaling pathway	0.0042016	102169001;102185139;102189677;	PLAC8L1;PHKG1;SHC3;
ko04145	Phagosome	0.0183664	102173284;102174906;102184859;	NOXA1;SFTPD;LOC102184859;
ko04662	B cell receptor signaling pathway	0.0335372	102174972;102184859;	CARD14;LOC102184859;
ko04974	Protein digestion and absorption	0.0339261	108635404	LOC108635404
ko04064	NF-kappa B signaling pathway	0.0527881	102174972;102180880;	CARD14;LOC102180880;
ko04922	Glucagon signaling pathway	0.0659809	102183734;102185139;	GCG;PHKG1;
ko04380	Osteoclast differentiation	0.0888889	102173284;102184859;	NOXA1;LOC102184859;
ko04062	Chemokine signaling pathway	0.133252	102180880;102189677;	LOC102180880;SHC3;
ko04650	Natural killer cell mediated cytotoxicity	0.14024	102189677;108635459;	SHC3;LOC108635459;
ko04020	Calcium signaling pathway	0.202832	102185139	PHKG1
ko04722	Neurotrophin signaling pathway	0.214677	102189677	SHC3
ko05214	Glioma	0.226352	102189677	SHC3
ko05206	MicroRNAs in cancer	0.22985	102172910	EGFL7
ko04623	Cytosolic DNA-sensing pathway	0.233189	102180880	LOC102180880
ko05140	Leishmaniasis	0.233189	102173284	NOXA1
ko04917	Prolactin signaling pathway	0.239966	102189677	SHC3
ko00510	N-Glycan biosynthesis	0.248912	108633896	KCTD7
ko05220	Chronic myeloid leukemia	0.251133	102189677	SHC3
ko05100	Bacterial invasion of epithelial cells	0.25995	102189677	SHC3
ko04320	Dorso-ventral axis formation	0.275137	102172910	EGFL7
ko03010	Ribosome	0.295425	102183178;108637994;	LOC102183178;SRRM5;
ko05150	Staphylococcus aureus infection	0.296306	102184859	LOC102184859
ko02010	ABC transporters	0.300467	102181811	LOC102181811
ko04915	Estrogen signaling pathway	0.300467	102189677	SHC3
ko04510	Focal adhesion	0.304576	100860805;102184316;102189677;	SPP1;ZNF641;SHC3;
ko04330	Notch signaling pathway	0.308716	102172910	EGFL7
ko04911	Insulin secretion	0.308716	102183734	GCG
ko04060	Cytokine-cytokine receptor interaction	0.309614	102180880	LOC102180880
ko04012	ErbB signaling pathway	0.311793	102184316;102189677;	ZNF641;SHC3;
ko04660	T cell receptor signaling pathway	0.318894	102174972	CARD14
ko04666	Fc gamma R-mediated phagocytosis	0.336846	102184859	LOC102184859
ko04260	Cardiac muscle contraction	0.338812	102173195	LOC102173195
ko04919	Thyroid hormone signaling pathway	0.363857	102172910	EGFL7
ko04670	Leukocyte transendothelial migration	0.365745	102173284	NOXA1
ko05132	Salmonella infection	0.365745	102180880	LOC102180880
ko05146	Amoebiasis	0.369504	108635404	LOC108635404
ko00190	Oxidative phosphorylation	0.389792	102173195	LOC102173195
ko04151	PI3K-Akt signaling pathway	0.391128	100860805	SPP1
ko04611	Platelet activation	0.400588	108635404	LOC108635404
ko05162	Measles	0.407681	102184859	LOC102184859
ko04072	Phospholipase D signaling pathway	0.411197	102189677	SHC3
ko05012	Parkinson's disease	0.411197	102173195	LOC102173195
ko04933	AGE-RAGE signaling pathway in diabetic complications	0.419898	108635404	LOC108635404
ko04932	Non-alcoholic fatty liver disease (NAFLD)	0.430173	102173195	LOC102173195
ko03420	Nucleotide excision repair	0.467938	108636723	LOC108636723
ko04390	Hippo signaling pathway	0.489716	108638020	LOC108638020
ko04512	ECM-receptor interaction	0.495776	100860805	SPP1
ko05010	Alzheimer's disease	0.504736	102173195	LOC102173195
ko05034	Alcoholism	0.51644	102189677	SHC3
ko04142	Lysosome	0.517883	102180951	LAPTM4B
ko05016	Huntington's disease	0.545891	102173195	LOC102173195
ko05152	Tuberculosis	0.564544	102184859	LOC102184859
ko04360	Axon guidance	0.569735	102170348	RHOF
ko04014	Ras signaling pathway	0.62185	102189677	SHC3
ko05203	Viral carcinogenesis	0.622986	102188889	HPN
ko04141	Protein processing in endoplasmic reticulum	0.630841	102172817	UBXN2A
ko05166	HTLV-I infection	0.651365	102183627	ZFP36
ko04810	Regulation of actin cytoskeleton	0.860112	102184316	ZNF641
ko04740	Olfactory transduction	0.860695	102186826	KCNIP2
ko04144	Endocytosis	0.864767	108637540	LOC108637540
ko04010	MAPK signaling pathway	0.876327	102184316	ZNF641
