# Supplementary material for: The mRNA and miRNA profiles of goat bronchial epithelial cells stimulated by Pasteurella multocida strains of serotype A and D
Source: PeerJ. 2022 Mar 18;10:e13047. doi: 10.7717/peerj.13047 (PMC8935994; doi:10.7717/peerj.13047)
Supplement: Table S13 [file peerj-10-13047-s013.xlsx]

## Sheet: Sheet1
KEGG enrichment analysis of common differentially expressed genes in the P. multocida strain serotype A- and D-stimulated groups
pathway_id	pathway_name	p-value(P. multocida strain serotype A stimulated group)	p-value(P. multocida strain serotype D stimulated group)	Gene_ID	Gene_name
ko00071	Fatty acid degradation	0.455679	0.193651	102175781	LOC102175781
ko00270	Cysteine and methionine metabolism	0.455679	0.193651	102176573	MAPRE2
ko00280	Valine, leucine and isoleucine degradation	0.451113	0.191264	102175781	LOC102175781
ko01212	Fatty acid metabolism	0.482289	0.207828	102175781	LOC102175781
ko04020	Calcium signaling pathway	0.0307352	0.202832	102171644	SLC8A2
ko04022	cGMP - PKG signaling pathway	0.555949	0.485124	102171644	SLC8A2
ko04024	cAMP signaling pathway	0.103701	0.589899	100860801	LIPE
ko04060	Cytokine-cytokine receptor interaction	0.210059	0.309614	108633857	LOC108633857
ko04080	Neuroactive ligand-receptor interaction	0.515652	0.383764	102170026;102180503;	NPFF;GPR21;
ko04145	Phagosome	0.321788	0.0183664	102176404	TUBA8
ko04150	mTOR signaling pathway	0.00511802	0.326931	102176667	DDIT4
ko04151	PI3K-Akt signaling pathway	0.0365098	0.391128	102176667	DDIT4
ko04152	AMPK signaling pathway	0.131794	0.361964	100860801	LIPE
ko04210	Apoptosis	0.241027	0.455088	102176404	TUBA8
ko04530	Tight junction	0.192631	0.66778	102182798	TSGA10
ko04540	Gap junction	0.00731416	0.350489	102176404	TUBA8
ko04550	Signaling pathways regulating pluripotency of stem cells	0.217829	0.576138	102171875	KLF4
ko04610	Complement and coagulation cascades	0.454398	0.421623	102185818	F8
ko04630	Jak-STAT signaling pathway	0.633102	0.534884	108633857	LOC108633857
ko04710	Circadian rhythm	0.27111	0.105876	100860876	RORC
ko04722	Neurotrophin signaling pathway	0.704847	0.214677	102172004	ZBTB32
ko04740	Olfactory transduction	0.99944	0.860695	102171644	SLC8A2
ko04910	Insulin signaling pathway	0.0391489	0.0042016	100860801	LIPE
ko04923	Regulation of lipolysis in adipocyte	0.0180539	0.179227	100860801	LIPE
ko04925	Aldosterone synthesis and secretion	0.0618017	0.275137	100860801	LIPE
ko04974	Protein digestion and absorption	0.141191	0.0339261	102171644;102181714;	SLC8A2;C18H19orf18;
ko04977	Vitamin digestion and absorption	0.345971	0.139517	102184100	TNFAIP6
ko05200	Pathways in cancer	0.000579811	0.804643	102172004	ZBTB32
ko05202	Transcriptional misregulation in cancers	0.610915	0.676679	102172004	ZBTB32
ko05206	MicroRNAs in cancer	0.472929	0.22985	102176667	DDIT4
ko05221	Acute myeloid leukemia	0.455679	0.193651	102172004	ZBTB32
ko05321	Inflammatiory bowel disease (IBD)	0.5317	0.235454	100860876	RORC
